# Hfq CLASH uncovers sRNA-target interaction networks involved in adaptation to nutrient availability

Ira A. Iosub<sup>1</sup>, Marta Marchiorretto<sup>2</sup>, Brandon Sy<sup>4</sup>, Stuart McKellar<sup>1</sup>, Karen J. Nieken<sup>3</sup>, Rob W.  
van Nues<sup>3</sup>, Jai J. Tree<sup>4</sup>, Gabriella Viero<sup>2</sup> and Sander Granneman<sup>1\*</sup>

## **Affiliations:**

<sup>1</sup>Centre for Synthetic and Systems Biology, University of Edinburgh, Edinburgh EH9 3BF, UK.

<sup>2</sup>Institute of Biophysics, CNR Unit at Trento, Italy.

<sup>3</sup>Institute of Cell Biology, University of Edinburgh, Edinburgh EH9 3FF, UK.

<sup>4</sup>School of Biotechnology and Biomolecular Sciences, University of New South Wales, Sydney 2052, NSW, Australia.

\*To whom correspondence should be addressed:

Sander Granneman

e-mail: [sgrannem@ed.ac.uk](mailto:sgrannem@ed.ac.uk)

Tel: +44 131 6519082

## 27 **Abstract**

28           By shaping gene expression profiles, small RNAs (sRNAs) enable bacteria to very  
29 efficiently adapt to constant changes in their environment. To better understand how  
30 *Escherichia coli* acclimatizes to changes in nutrient availability, we performed UV cross-  
31 linking, ligation and sequencing of hybrids (CLASH) to uncover sRNA-target interactions.  
32 Strikingly, we uncovered hundreds of novel Hfq-mediated sRNA-target interactions at specific  
33 growth stages, involving many novel 3'UTR-derived sRNAs and a plethora of sRNA-sRNA  
34 interactions. We discovered sRNA-target interaction networks that play a role in adaptation to  
35 changes in nutrient availability. We characterized a novel 3'UTR-derived sRNA (MdoR), which  
36 is part of a regulatory cascade that enhances maltose uptake by (a) inactivating repressive  
37 pathways that block the accumulation of maltose transporters and (b) by reducing the flux of  
38 general porins to the outer membrane. Our work provides striking examples of how bacteria  
39 utilize sRNAs to integrate multiple regulatory pathways to enhance nutrient stress adaptation.

40 Microorganisms are renowned for their ability to adapt to environmental changes by  
41 rapidly rewiring their gene expression program. These responses are mediated through  
42 integrated transcriptional and post-transcriptional networks. Control at the transcriptional level  
43 dictates which genes are expressed (Balleza et al., 2009; Martínez-Antonio et al., 2008) and  
44 is well-characterised in *Escherichia coli*. Post-transcriptional regulation is key for controlling  
45 adaptive responses. By using riboregulators and RNA-binding proteins (RBPs), cells can  
46 efficiently integrate multiple pathways and incorporate additional signals into regulatory  
47 circuits. *E. coli* employs many post-transcriptional regulators, including small regulatory RNAs  
48 (sRNAs (Waters and Storz, 2009)), *cis*-acting RNAs (Kortmann and Narberhaus, 2012), and  
49 RNA binding proteins (RBPs) (Holmqvist and Vogel, 2018). The sRNAs are the largest class  
50 of bacterial regulators, which work in tandem with RBPs to regulate their RNA targets (Storz  
51 et al., 2011; Waters and Storz, 2009). The base-pairing interactions are often mediated by  
52 RNA chaperones such as Hfq and ProQ, which help to anneal or stabilize the sRNA and  
53 sRNA-target duplex (Smirnov et al., 2017, 2016; Updegrove et al., 2016). Small RNAs can  
54 repress or stimulate translation and transcription, as well as control mRNA stability  
55 (Sedlyarova et al., 2016; Updegrove et al., 2016; Vogel and Luisi, 2011; Waters and Storz,  
56 2009).

57 During growth in rich media, *E. coli* are exposed to continuously changing conditions,  
58 such as fluctuations in nutrient availability, pH and osmolarity. Consequently, *E. coli* elicit  
59 complex responses that result in physiological and behavioural changes such as envelope  
60 composition remodelling, quorum sensing, nutrient scavenging, swarming and biofilm  
61 formation. Even subtle changes in the growth conditions can trigger rapid adaptive responses.  
62 Accordingly, each stage of the growth curve is characterised by different physiological states  
63 driven by activation of different transcriptional and post-transcriptional networks. Moreover,  
64 growth phase dependency of virulence and pathogenic behaviour has been demonstrated in  
65 both Gram-positive and Gram-negative bacteria. In some cases a particular growth stage is  
66 non-permissive for the induction of virulence (Mäder et al., 2016; Mouali et al., 2018). Although  
67 the exponential and stationary phases have been characterised in detail (Navarro Llorens et  
68 al., 2010; Pletnev et al., 2015), little is known about the transition between these two phases.  
69 During this transition, the cell population starts to scavenge alternative carbon sources, which  
70 requires rapid remodelling of their transcriptome (Baev et al., 2006a, 2006b; Sezonov et al.,  
71 2007).

72 To understand sRNA-mediated adaptive responses, detailed knowledge of the  
73 underlying post-transcriptional circuits is required. In *E. coli*, hundreds of sRNAs have been  
74 discovered, but only a fraction of these have been characterised. A key step to unravel the  
75 roles of sRNAs in regulating adaptive responses is to identify their targets. To tackle this  
76 globally, high-throughput methods have been developed that have uncovered a plethora of

77 sRNA-target interactions, many more than previously anticipated (Han et al., 2016; Hör et al.,  
78 2018; Hör and Vogel, 2017; Lalaouna et al., 2015; Melamed et al., 2016; Waters et al., 2016).

79 To uncover sRNA-target RNA interaction dynamics that take place during the entry  
80 into stationary phase, we applied UV cross-linking, ligation and sequencing of hybrids  
81 (CLASH) (Helwak et al., 2013; Kudla et al., 2011) on *E. coli*. First, we demonstrate that the  
82 highly stringent purification steps make CLASH a robust method for direct mapping of Hfq-  
83 mediated sRNA-target interactions in *E. coli*. This enabled us to significantly expand on the  
84 sRNA-target interaction repertoire found by RNase E CLASH (Waters et al., 2016) and RIL-  
85 seq (Melamed et al., 2016), and we show that Hfq CLASH can generate very reliable results.  
86 Using CLASH we identified many potentially novel 3'UTR-derived sRNAs, confirming that this  
87 class of sRNAs (Chao et al., 2012, 2017; Chao and Vogel, 2016; Miyakoshi et al., 2015a) is  
88 highly prevalent.

89 Next, we focussed our analyses on interactions that were specifically recovered during  
90 the transition phase where we identified a surprisingly large number of interactions, including  
91 sRNA-sRNA interactions. Our data suggests that during the transition stage, ArcZ represses  
92 CyaR levels, thereby indirectly controlling genes involving nutrient uptake during the transition  
93 phase. We also characterized a novel 3'UTR-derived sRNA, which we refer to as MdoR (*mal*-  
94 dependent OMP repressor). Unlike the majority of bacterial sRNAs, MdoR is transiently  
95 expressed during the transition phase. We demonstrate that MdoR is a degradation  
96 intermediate of the *malG* 3'UTR, the last transcript of the *malEFG* polycistron that encodes  
97 components of the maltose transport system. We show that MdoR directly downregulates  
98 several mRNAs encoding major porins and suppresses the envelope stress response  
99 controlled by  $\sigma^E$ . We propose that MdoR is part of a regulatory network that, during the  
100 transition phase, promotes accumulation of high affinity maltose transporters in the outer  
101 membrane by repressing competing pathways.

102

## 103 **Results**

### 104 **Hfq CLASH in *E. coli*.**

105 To unravel the post-transcriptional networks that underlie the transition between  
106 exponential and stationary growth phases in *E. coli*, we performed CLASH (Helwak et al.,  
107 2013; Kudla et al., 2011) using Hfq as bait (Figure 1A). To generate high quality Hfq CLASH  
108 data made a number of improvements to the original protocol used for RNase E CLASH  
109 (Waters et al., 2016).

110



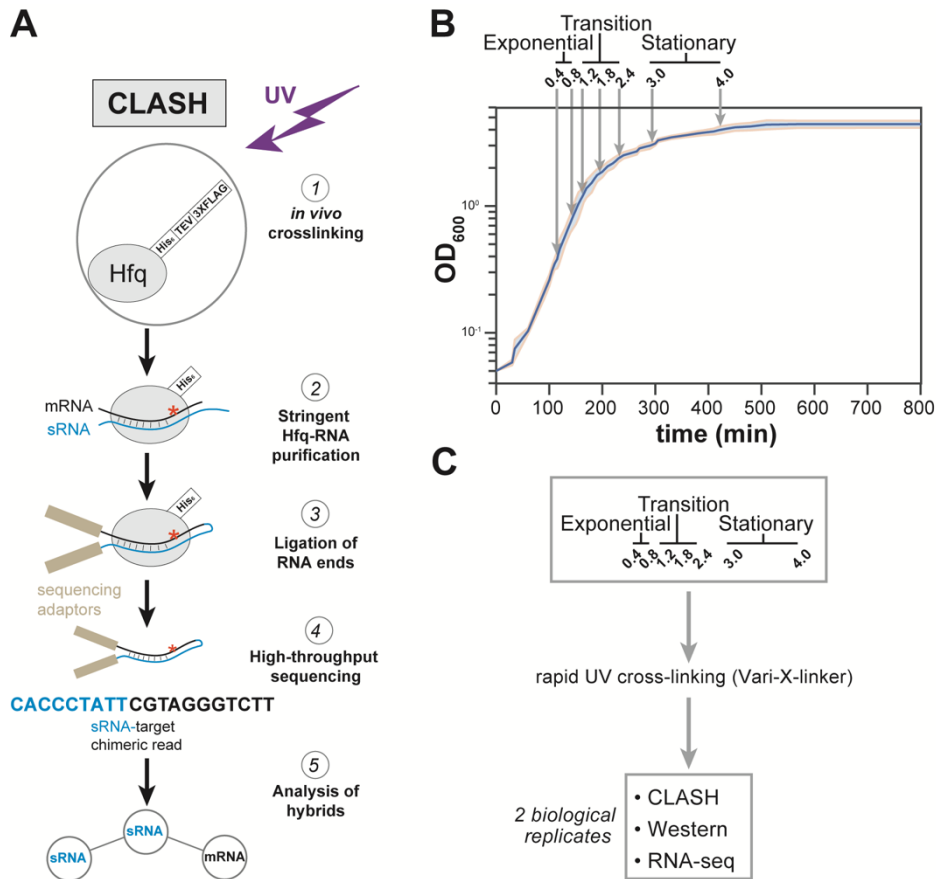

111

112 **Figure 1. Hfq CLASH experiments at different growth phases in *E. coli*.**

113 (A) Overview of the critical experimental steps for obtaining the Hfq CLASH data. *E. coli* cells expressing  
 114 an HTF (His6-TEV-3xFLAG)-tagged Hfq(Jai J. Tree et al., 2014) were grown in LB and an equal number  
 115 of cells were harvested at different optical densities (OD<sub>600</sub>). Hfq binds to sRNA-target RNA duplexes,  
 116 and RNA ends that are in close proximity are ligated together. After removal of the protein, cDNA  
 117 libraries are prepared and sequenced. The single reads can be used to map Hfq-RNA interactions,  
 118 whereas the chimeric reads can be traced to sRNA-target interactions. (B) A growth curve of the  
 119 cultures used for the Hfq CLASH experiments, with OD<sub>600</sub> at which cells were cross-linked indicated by  
 120 circles, and each growth stage is indicated above the plot. The results show the mean and standard  
 121 deviations of two biological replicates. Source data are provided as a Source Data file. (C) Cultures at  
 122 the same OD<sub>600</sub> cross-linked and harvested by filtration were analysed by Hfq CLASH, RNA-seq and  
 123 Western blotting to detect Hfq.

124

125 Our Hfq CLASH protocol has several advantages over the related RIL-seq method  
 126 (see Materials and Methods and Discussion). As negative controls, replicate CLASH  
 127 experiments were performed on the untagged parental strain. When combined, the control  
 128 samples had ~10 times lower number of single-mapping reads and contained only 297 unique  
 129 chimeric reads, compared to the over 70.000 chimeras identified in the tagged Hfq data. This  
 130 demonstrates that the purification method produced very low background levels.

131 Cell samples from seven different optical densities were subjected to Hfq CLASH.  
132 Based on the growth curve analysis shown in Figure 1B, we categorized OD<sub>600</sub> densities 0.4  
133 and 0.8 as exponential growth phase, 1.2, 1.8, 2.4 as the transition phase from exponential to  
134 stationary, and 3.0 and 4.0 as early stationary phase. To complement the CLASH data, RNA-  
135 seq and Western blot analysis was performed on UV-irradiated cells to quantify steady state  
136 RNA and Hfq protein levels, respectively (Figure 1C, Figure 1-figure supplement 1,  
137 Supplementary Table 1). Western blot analyses revealed that Hfq levels gradually increased  
138 during growth, however, when normalized to the levels of the chaperone GroEL, the increase  
139 was modest (Figure 1-figure supplement 1A-B). To determine the cross-linking efficiency, Hfq-  
140 RNA complexes immobilized on nickel beads were radiolabelled, resolved on NuPAGE gels  
141 and detected by autoradiography. The data show that the recovery of Hfq and radioactive  
142 signal was comparable at each optical density studied (Figure 1-figure supplement 1C).  
143 Comparison of normalized read counts of replicate CLASH and RNA-seq experiments showed  
144 that the results were highly reproducible (Figure 1-figure supplement 2).

145

#### 146 **Hfq binds to the transcriptome in a growth-stage dependent manner.**

147 Meta-analyses of the Hfq CLASH sequencing data revealed that the distribution of Hfq  
148 binding across mRNAs was very similar at each growth stage. We observed the expected Hfq  
149 enrichment at the 5'UTRs and at the 3'UTRs at each growth stage (see Figure 1-figure  
150 supplement 3A and 3B for examples). After identifying significantly enriched Hfq binding peaks  
151 (FDR ≤ 0.05; see Methods for details) we used the genomic coordinates of these peaks to  
152 search for Hfq binding motifs in mRNAs. The most enriched k-mer included poly-U stretches  
153 (Figure 1-figure supplement 3C) that resemble the poly-U tracts characteristic to Rho-  
154 independent terminators found at the end of many bacterial transcripts (Wilson and Hippel,  
155 1995), and confirms the motif uncovered in CLIP-seq studies in *Salmonella* (Holmqvist et al.,  
156 2016).

157

158

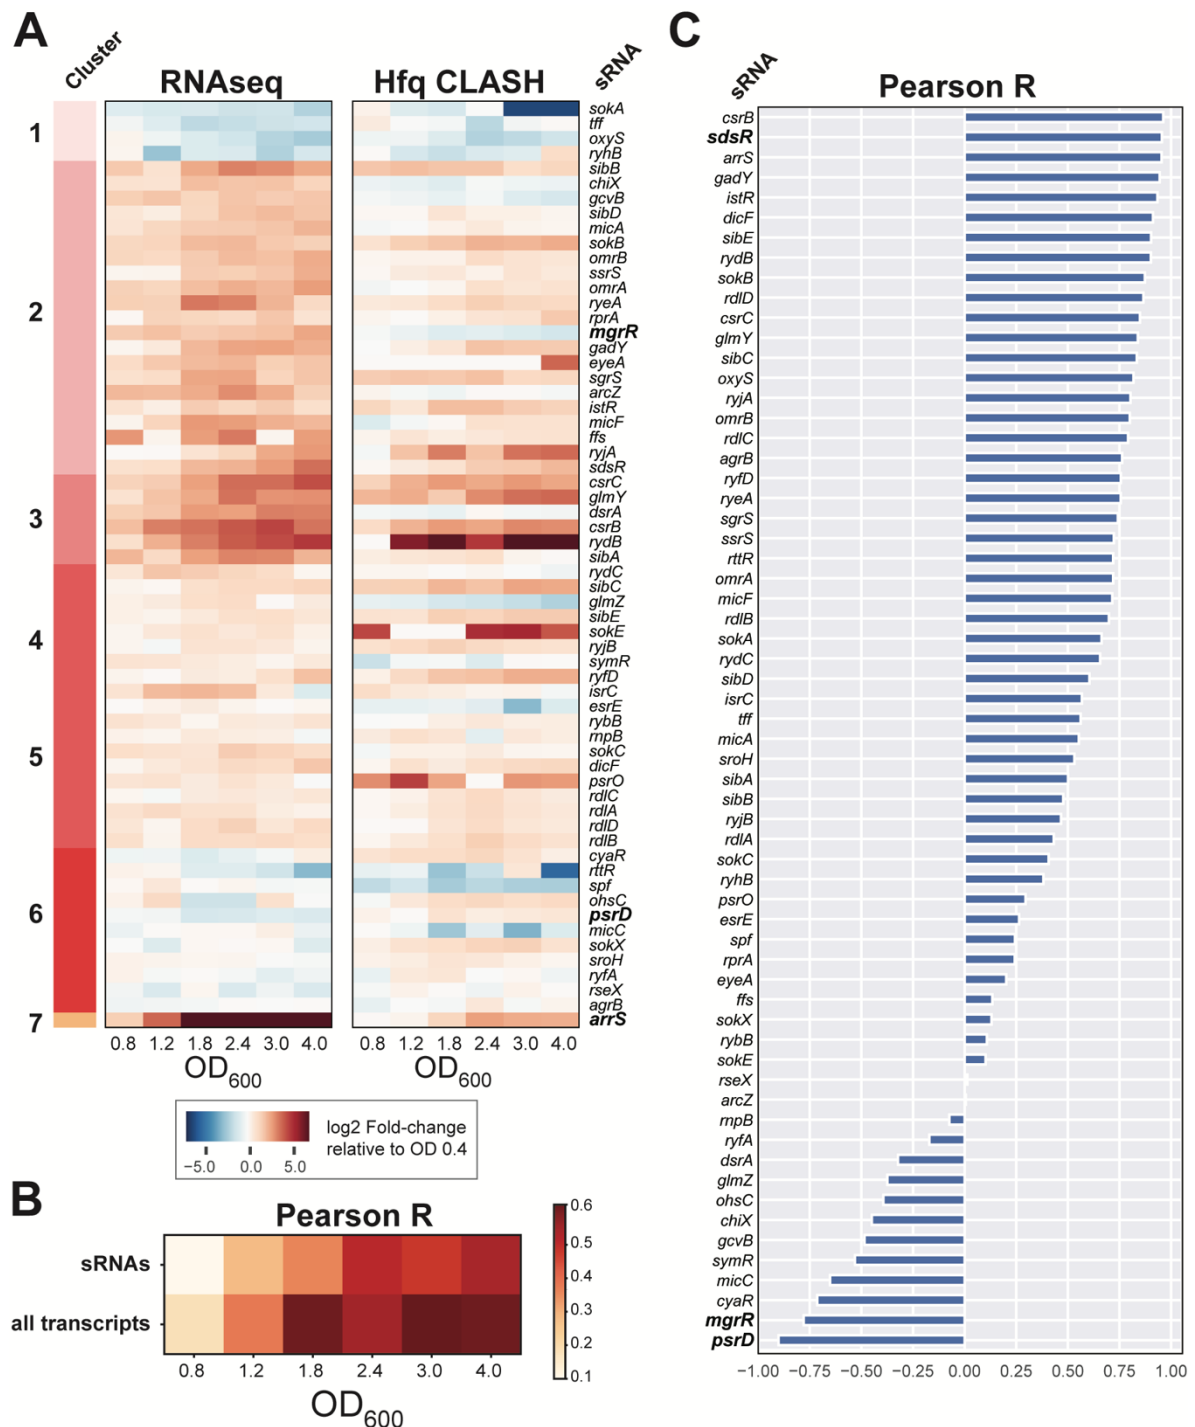

159 **Figure 2. Hfq binding to sRNAs and sRNA steady state levels in *E. coli* do not always correlate**  
 160 **highly.**

161 (A) Heatmaps showing the changes in sRNA steady-states (Left) and Hfq cross-linking (Right) relative  
 162 to  $OD_{600}$  0.4. The clustered RNA-seq data were generated by k-means clustering using the fold-  
 163 changes of normalized counts ( $\log_2$  of transcripts per million (TPM)) relative to  $OD_{600}$  0.4. A blue shade  
 164 indicates a reduction in levels compared to  $OD_{600}$  0.4, whereas a dark orange shade indicates an  
 165 increase. The cluster assignment is indicated at the left, and the growth stage is indicated as  $OD_{600}$   
 166 units below each heatmap. Note that *ssrS* and *ffs* encode the cytoplasmic RNAs 6S, a regulator of RNA  
 167 polymerase, and 4.5S, the signal recognition particle RNA. EyeA is an uncharacterized sRNA mapped  
 168 by (Sætrum et al., 2005). (B) Global correlation of between Hfq binding and steady state RNA levels

169 increases at higher cell densities. The heatmap shows the changes in Pearson R correlation between  
170 Hfq binding and RNA expression (normalised as in (a)), for sRNAs (top) and all transcripts (bottom).  
171 (C) Assessment of correlation between changes in expression and Hfq binding profiles for individual  
172 sRNAs. The y-axis shows the gene name of the sRNAs and the Pearson coefficient indicating the  
173 correlation between Hfq binding and steady state levels for each sRNA is shown on the x-axis.

174

175         Given the established role of Hfq in sRNA stabilization and mediating sRNA-target  
176 interactions, it was logical to assume that changes in Hfq binding would also be reflected in  
177 changes in sRNA steady-state levels. This would imply that the Hfq binding data would show  
178 a strong correlation with the RNA-seq data. To test this, we compared the Hfq cross-linking  
179 data to the RNA-seq data. K-means clustering of the normalized data revealed 7 different  
180 patterns of changes in normalised read counts in the Hfq cross-linking and total RNA-seq data  
181 (Figure 2A). Reminiscent of recent work performed in *Salmonella* (Chao et al., 2012), most  
182 sRNAs in *E. coli* appear to be preferentially expressed when the cells reach the transition and  
183 stationary phase (Figure 2A). However, much to our surprise, the Hfq cross-linking profile did  
184 not always follow the same trend (Figure 2A-C, Figure 2-figure supplement 1A). Globally,  
185 changes in sRNA expression did not correlate strongly with the Hfq-binding profile (and *vice*  
186 *versa*) (Fig 2B-C). The correlation between changes in sRNA expression levels versus  
187 changes in Hfq cross-linking was particularly poor at lower cell density (OD<sub>600</sub> 0.8: r = 0.10)  
188 but gradually improved as the cells approach stationary phase (OD<sub>600</sub> 4.0 r =0.54; Figure 2B  
189 and Figure 2-figure supplement 1A). A very similar result was obtained when comparing all  
190 Hfq-bound RNAs, including mRNAs (Figure 2B and Figure 2-figure supplement 1B). Striking  
191 examples are MgrR and PsrD, which showed a strong anti-correlation between Hfq CLASH  
192 and RNA-seq counts (Figure 2C) In the case of PsrD, Hfq binding showed a modest increase  
193 during the growth phase (Figure 2A; right heat map, cluster 6), whereas sRNA levels steadily  
194 decreased (Figure 2A; left heat map; cluster 2). PsrD/SraB has also been shown to bind ProQ  
195 (Smirnov et al., 2017), which may explain why its accumulation does not correlate with Hfq  
196 binding. On the other side of the spectrum, SdsR showed a very high positive Pearson  
197 correlation (Figure 2), suggesting that its accumulation heavily relies on Hfq binding.

198         We conclude that the dynamics of sRNA expression and binding to Hfq are not always  
199 highly correlated.

200

### 201 **Hfq CLASH robustly detects RNA-RNA interactions.**

202         To get a complete overview of the RNA-RNA interactions captured by Hfq CLASH, we  
203 merged the data from the two biological replicates of CLASH growth phase experiments  
204 (Supplementary Table 2.1). Overlapping paired-end reads were merged and unique chimeric

205

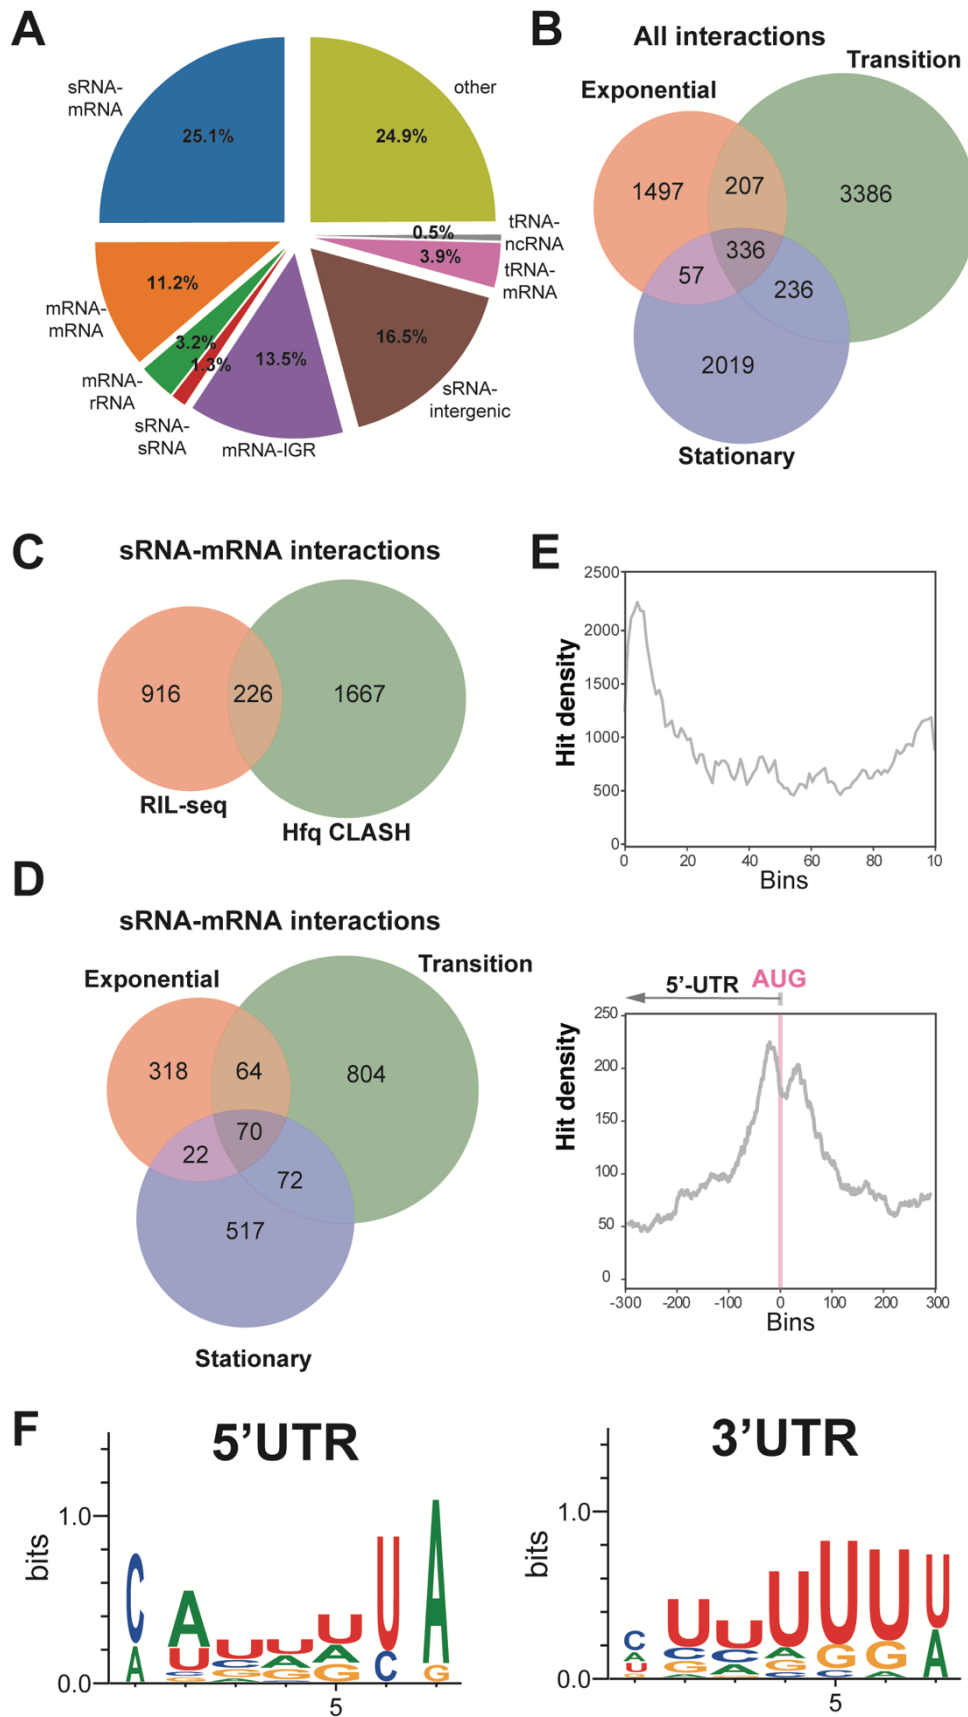

206 **Figure 3. Hfq CLASH detects RNA-RNA interactions in *E. coli*.**

207 (A) Intermolecular transcript combinations found in interactions captured by Hfq CLASH. Combination  
208 count of all uniquely annotated hybrids on genomic features. \*tRNA-tRNA and rRNA-rRNA chimeras  
209 originating from different coding regions were removed. (B) Venn diagram showing the intersection  
210 between interactions from statistically filtered CLASH data from two biological replicates, recovered at  
211 three main growth stages: exponential ( $OD_{600}$  0.4 and 0.8), transition ( $OD_{600}$  1.2, 1.8, 2.4) and early  
212 stationary ( $OD_{600}$  3.0 and 4.0). (C) Comparison of sRNA-mRNA interactions found in RIL-seq S-chimera  
213 data and Hfq CLASH data. (D) Same as in (B) but for sRNA-mRNA interactions. (E) (Top) Distribution  
214 of chimeras representing statistically filtered interactions, which uniquely map to mRNA genes.  
215 Overlapping fragments of the two individual parts of the chimeras were collapsed into single clusters  
216 followed by generation of distribution plots. Each gene was divided in 100 bins the number of clusters  
217 that map to each bin (hit density; y-axis) was calculated; (Bottom) For the distribution plot around the  
218 AUG, the gene length was normalized in 601 bins (x-axis) 5'-end overlap (-300) before the start of the  
219 coding sequence, and 300 bins downstream AUG (+300); the bins corresponding to the start codon are  
220 indicated with a pink line. (F) Enriched motifs in chimeras that uniquely overlap 5'UTRs and 3'UTRs;  
221 the logos were drawn using the top 20 K-mers.

222

223 reads were identified using the hyb pipeline (Travis et al., 2013). To select RNA-RNA  
224 interactions for further analysis, we applied a probabilistic analysis pipeline previously used  
225 for the analysis of RNA-RNA interactions in human cells (Sharma et al., 2016) and adapted it  
226 for the analyses of RNase E CLASH data (Waters et al., 2016). This pipeline tests the  
227 likelihood that observed interactions could have formed spuriously. Strikingly, 87% of the  
228 chimeric reads had a Benjamini-Hochberg adjusted p-value of 0.05 or less, indicating that it is  
229 highly unlikely that these interactions were generated by random ligation of RNA molecules.  
230 These analyses demonstrate the robustness of Hfq CLASH protocol. A complete overview of  
231 statistically significantly enriched chimeras is provided in Supplementary Table 2.2.

232 The distribution of combinations of transcript classes found in the statistically filtered  
233 chimeric reads indicates the sRNA-mRNA interactions as the most frequent recovered Hfq-  
234 mediated interaction type (~25%; Figure 3A). We suspect that this number might be higher,  
235 as about 16% of the chimeras contained sRNA and fragments that mapped to intergenic  
236 regions (Figure 3A). Manual inspection of several of these indicated that some of the intergenic  
237 sequences were located near genes for which the UTRs were unannotated or short. The vast  
238 majority of these interactions were growth stage-specific (Figure 3B). Hfq CLASH identified  
239 almost 2000 sRNA-mRNA interactions (Figure 3C; Supplementary Table 2). Around 20% of  
240 the interactions found with RIL-seq and ~21% (27 out of 126) of the experimentally verified  
241 interactions present in sRNATarbase3 (Supplementary Table 2.7) were recovered. These  
242 results suggest that while the CLASH data contained known and many novel interactions, the  
243 analyses clearly were not exhaustive.



244           Meta-analysis revealed that the majority of interactions were identified in the transition  
245 phase (Figure 3D) and that the mRNA fragments found in chimeric reads were strongly  
246 enriched in 5'UTRs peaking near the translational start codon (Figure 3E). The latter is  
247 consistent with the canonical mode of translational inhibition by sRNAs (Bouvier et al., 2008)  
248 and demonstrates the robustness of the data. Enrichment was also found in 3'UTRs of mRNAs  
249 (Figure 3F). Motif analyses revealed a distinct sequence preference in 5'UTR and 3'UTR  
250 binding sites (Figure 3G, Supplementary Table 3). The motifs enriched in the 5'UTRs chimeric  
251 fragments are more consistent with Hfq binding to Shine Dalgarno-like (ARN)<sub>n</sub> sequences (Jai  
252 J. Tree et al., 2014) and U-tracts, whereas the 3'UTR-containing chimera consensus motif  
253 corresponds to poly-U transcription termination sites (Figure 3F and Supplementary Table 3).

254

### 255 **Hfq CLASH predicts sRNA-sRNA interactions as a widespread layer of post-** 256 **transcriptional regulation.**

257           We also uncovered a surprisingly large number of sRNA-sRNA interactions  
258 (Supplementary Table 2.4), many of which were uniquely found in our Hfq CLASH data (Figure  
259 4A). Many interactions were growth-stage specific and the sRNA-sRNA networks show  
260 extensive rewiring across the exponential, transition and stationary phases (Figure 4-figure  
261 supplement 1). The sRNA-sRNA network is dominated by several abundant sRNAs that  
262 appear to act as hubs that have many interacting partners: ChiX, Spot42 (spf), ArcZ and GcvB.  
263 In many cases the experimentally-validated sRNA seed sequences were found in the chimeric  
264 reads, for both established and novel interactions. For example, the vast majority of ArcZ  
265 sRNA-sRNA chimeras contained the known and well conserved seed sequence (Figure 4B,  
266 Figure 4-figure supplement 2).

267           The sRNA-sRNA chimeras containing CyaR fragments were of particular interest, as  
268 the sRNA is primarily expressed during the transition from late exponential to stationary phase  
269 (De Lay and Gottesman, 2009). In the case of CyaR, the known seed sequence (De Lay and  
270 Gottesman, 2009; Papenfort et al., 2008) as well as a conserved ~25 nt fragment in the 5'  
271 region was found in chimeras (Figure 4-C; Figure 4-figure supplement 2). Similar seed  
272 sequences were identified in CLASH experiments using RNase E as a bait (Waters et al.,  
273 2016), suggesting that this region represents a *bona fide* interaction site. Notably, we identified  
274 ArcZ-CyaR chimeras containing the seed sequence from both sRNAs (Figure 4-figure  
275 supplement 2) and these were detected specifically in the transition phase (Figure 4B-C),  
276 suggesting that these sRNAs could influence each other's activity. To validate these findings,  
277 we used an *E. coli* plasmid-based assay that is routinely used to monitor sRNA-sRNA  
278 interactions and expression of their target mRNAs (Melamed et al., 2016; Miyakoshi et al.,  
279 2015b; Jai J. Tree et al., 2014). An advantage of this system is that each sRNA would be  
280 uncoupled from the chromosomally encoded regulatory networks (that were thought to act

281 largely in a 1:1 stoichiometry) and to allow the specific effects of the sRNA-target RNA to be  
282 assessed (Miyakoshi et al., 2015b). Importantly, these sRNAs were induced during early  
283 exponential growth phase when the endogenous (processed) ArcZ and CyaR sRNAs are  
284 detectable at only very low levels (Figure 4-figure supplement 3B, lanes 1, 2, 5, 7). The qPCR  
285 data were subsequently normalized to the results obtained with a control scrambled sRNA to  
286 calculate fold changes in expression levels. Since it is difficult to predict directly from the  
287 CLASH data which sRNA in each pair acts as the decoy/sponge, we tested both directions.  
288 ArcZ overexpression not only decreased the expression of its mRNA targets (*tpx*, *sdaC*) by  
289 more than 50% but also that of CyaR (Figure 5D, panel I). Concomitantly, we observed a  
290 substantial increase in CyaR targets *nadE* and *yqaE* (Figure 4D, panel I). CyaR  
291 overexpression reduced the level of a direct mRNA target (*nadE*) by ~40% but it did not  
292 significantly alter the level of ArcZ or ArcZ mRNA targets (*tpx* and *sdaC*; Figure 4D, panel II).  
293 Notably, in this two-plasmid assay CyaR was not expressed at levels higher than ArcZ (Figure  
294 4-figure supplement 3A, panel II). Therefore, it is possible that under the tested conditions the  
295 CyaR overexpression was not sufficient to see an effect on ArcZ. We find this unlikely as  
296 overexpression of CyaR also did not significantly affect endogenous ArcZ levels, which was  
297 ~80-fold less abundant than CyaR in this experiment (Figure 4-figure supplement 3A, panel  
298 III). The qPCR results were also confirmed by Northern blot analyses (Figure 4-figure  
299 supplement 3B, lanes 1-8), which also demonstrate that ArcZ processing was not affected  
300 upon CyaR overexpression. These results suggest that the regulation is unidirectional,  
301 reminiscent of what has been described Qrr3 in *Vibrio harveyi* (Feng et al., 2015). We  
302 conclude that ArcZ acts as a CyaR anti-sRNA and can trigger its degradation.

303 To provide additional support for direct interactions between these sRNAs, we  
304 generated mutations in the seed sequences of the sRNAs analysed here (Figure 4C). We  
305 found that two G to C nucleotide substitutions in ArcZ was sufficient to disrupt ArcZ  
306 downregulation of CyaR (Figure 4C-D; ArcZ 70-71 + CyaR). This regulation, however, was  
307 almost fully restored when complementary mutations were introduced in the CyaR region  
308 (Figure 5C-D; ArcZ 70-71 + CyaR 38-39). These data also demonstrate that it is very unlikely  
309 that the observed changes in CyaR levels were be the result of Hfq redistribution due to over-  
310 expression of ArcZ over-expression (Moon and Gottesman, 2011; Papenfort et al., 2009), as  
311 the ArcZ seed mutant stably accumulated (and therefore effectively binds Hfq), but did not  
312 affect CyaR levels. Unexpectedly, the wild-type ArcZ was also able to effectively suppress the  
313 CyaR seed mutant (Figure 5D; ArcZ + CyaR 38-39), possibly because ArcZ can still form  
314 stable base-pairing interactions with the CyaR mutant.

315 These results, together with the CLASH data, strongly support the notion that ArcZ and  
316 CyaR base-pair *in vivo*, resulting in degradation of CyaR but not *vice versa*.

317



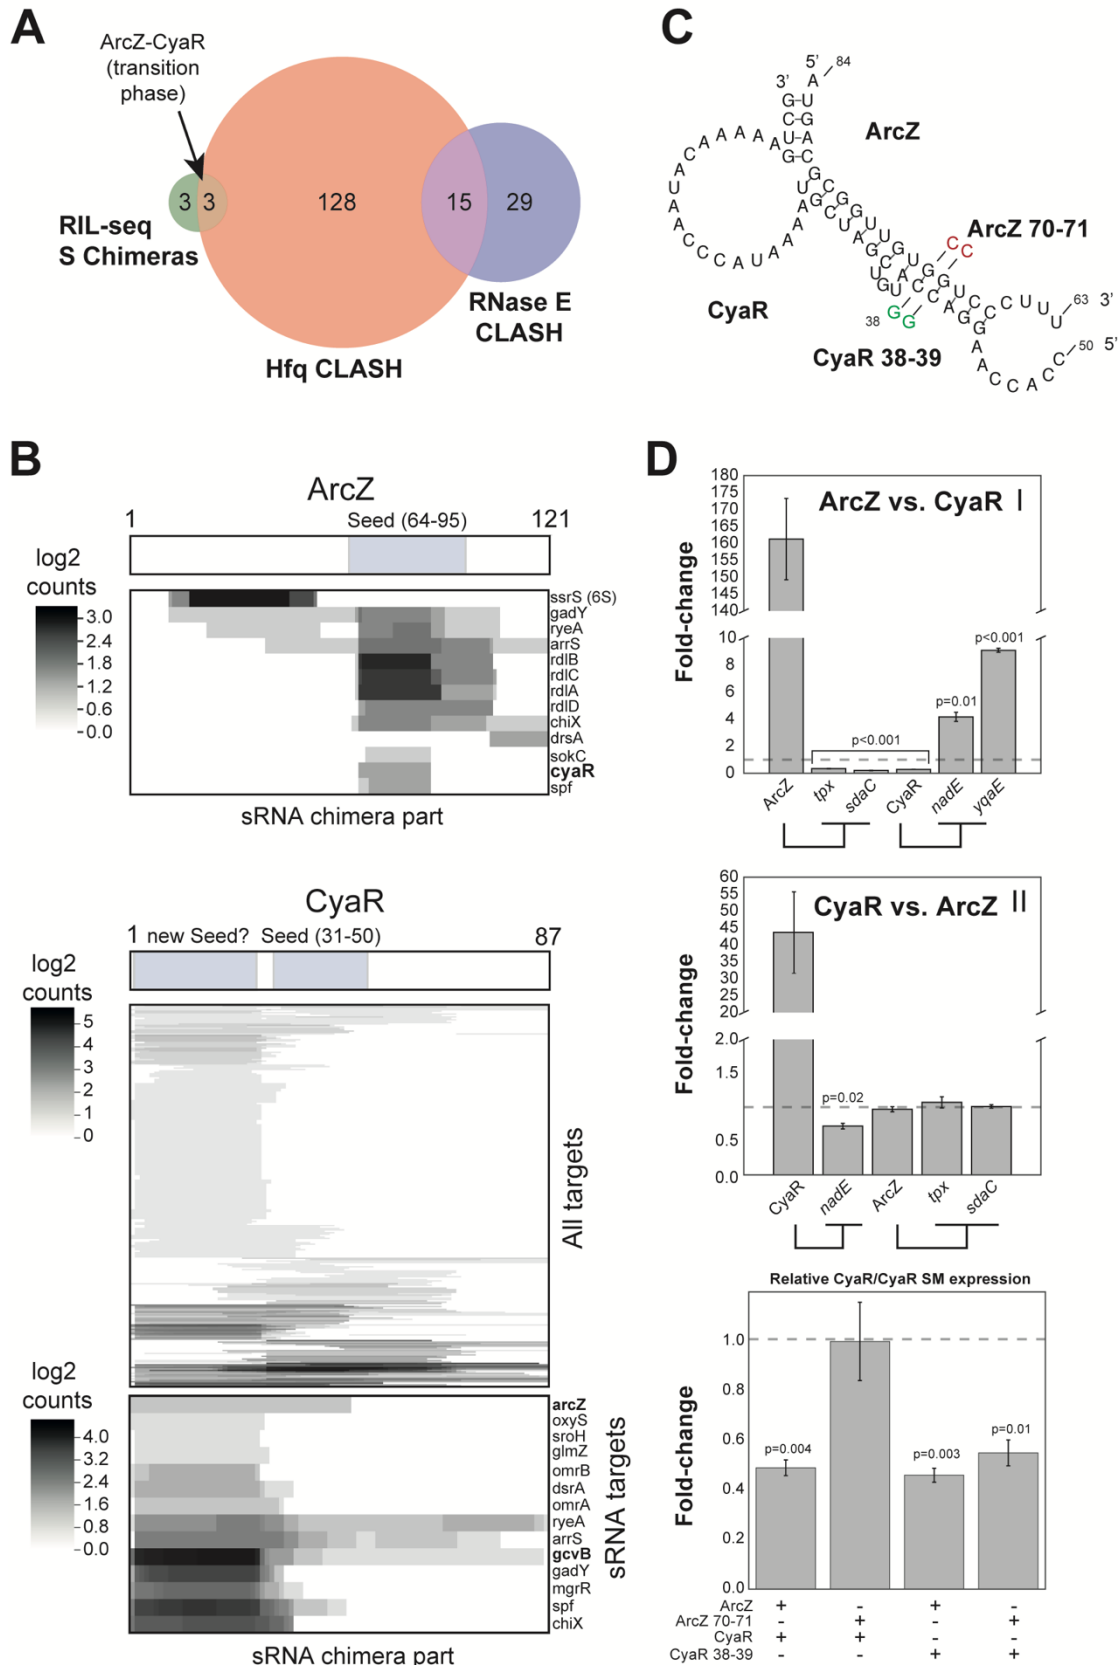

318

319 **Figure 4. sRNA-RNA interactions identified by CLASH are growth-stage specific.**

320 (A) Hfq CLASH uncovers sRNA-sRNA networks: comparison between statistically filtered sRNA-sRNA

321 interactions in the Hfq CLASH data, RIL-seq S-chimeras (Melamed et al., 2016) (log and stationary)

322 and RNase E CLASH (Waters et al., 2016). Only core genome sRNAs were considered. Red coloured  
323 sRNA-sRNA interactions have been characterized in more detail. (B) Heatmaps showing the read  
324 density ( $\log_2(\text{chimera count})$ ) of chimeric fragments mapping to ArcZ and CyaR. (Top) ArcZ regions  
325 involved in sRNA-sRNA interactions. The location of the known ArcZ seed sequence is indicated above.  
326 (Bottom) CyaR heatmaps that show all CyaR chimeras and CyaR-sRNA chimeras, respectively. The  
327 location of the known CyaR seed sequence, as well as a new seed, is indicated above. (C) Base-pairing  
328 interactions predicted from the ArcZ-CyaR chimeras using RNAcofold. The nucleotide substitutions for  
329 experimental validation of direct base-pairing are shown as red or green residues. (D) SRNA-sRNA  
330 interactions coordinate nutritional stress responses. ArcZ, CyaR were overexpressed and the levels of  
331 their targets were monitored by RT-qPCR. The *tpx* and *sdaC* mRNAs are ArcZ mRNA targets. The  
332 *nadE* and *yqaE* mRNAs are CyaR targets. The *dppA* mRNA is a GcvB target. Experiments were  
333 performed in biological and technical triplicates; Error bars indicate the standard error of the mean  
334 (SEM) of the three biological replicates. The dashed horizontal line indicates the level of the  
335 overexpressed scrambled RNA. (E) ArcZ and CyaR directly interact. The sRNAs and mutants as in (C)  
336 were ectopically co-expressed in *E. coli* and CyaR and CyaR 38-39 levels were quantified by RT-qPCR.  
337  
338

### 339 Hfq CLASH identifies novel sRNAs in untranslated regions

340 Two lines of evidence from our data indicate that many more mRNAs may be  
341 harbouring sRNAs in their UTRs or be involved in base-pairing among themselves. First,  
342 around 11% of the intermolecular chimeras mapped to mRNA-mRNA interactions (Figure 3A).  
343 Secondly, we observed extensive binding of Hfq in 3'UTRs near transcriptional terminators  
344 (Figure 1-figure supplement 3A, C), indicating that like in *Salmonella*, *E. coli* 3'UTRs may  
345 harbour many functional sRNAs (Chao et al., 2017). We identified 122 3'UTR-containing  
346 mRNA fragments that were involved in 550 interactions. Sixty-five of these interactions were  
347 also identified in the RIL-seq S-chimeras data (Melamed et al., 2016). Eighteen of the 3'UTRs  
348 were found as part of chimeras in the RIL-seq data, while 10 appeared stabilised upon  
349 transient inactivation of RNase E performed in *Salmonella* (TIER-seq data (Chao et al., 2017));  
350 Figure 6A, Supplementary Tables 2.5 and 2.6). Out of the 550 3'UTR-mRNA chimeric reads,  
351 79 were 3'UTRs fused to 5'UTRs of mRNAs, suggesting that these may represent 3'UTR-  
352 derived sRNAs that base-pair with 5'UTRs of mRNAs, a region frequently targeted by sRNAs  
353 (Supplementary Table 2.6). Strikingly, 223 interactions contained 3'UTR fragment of *cpxP*, 51  
354 of which were also found in the RIL-Seq data (Supplementary Table 2.6). In *Salmonella* *cpxP*  
355 harbours the CpxQ sRNA (Chao and Vogel, 2016). Our analyses greatly increased the  
356 number of potential CpxQ mRNA targets and show that the vast majority of CpxQ interactions  
357 take place during the transition and stationary phases (Supplementary Table 2.6).  
358

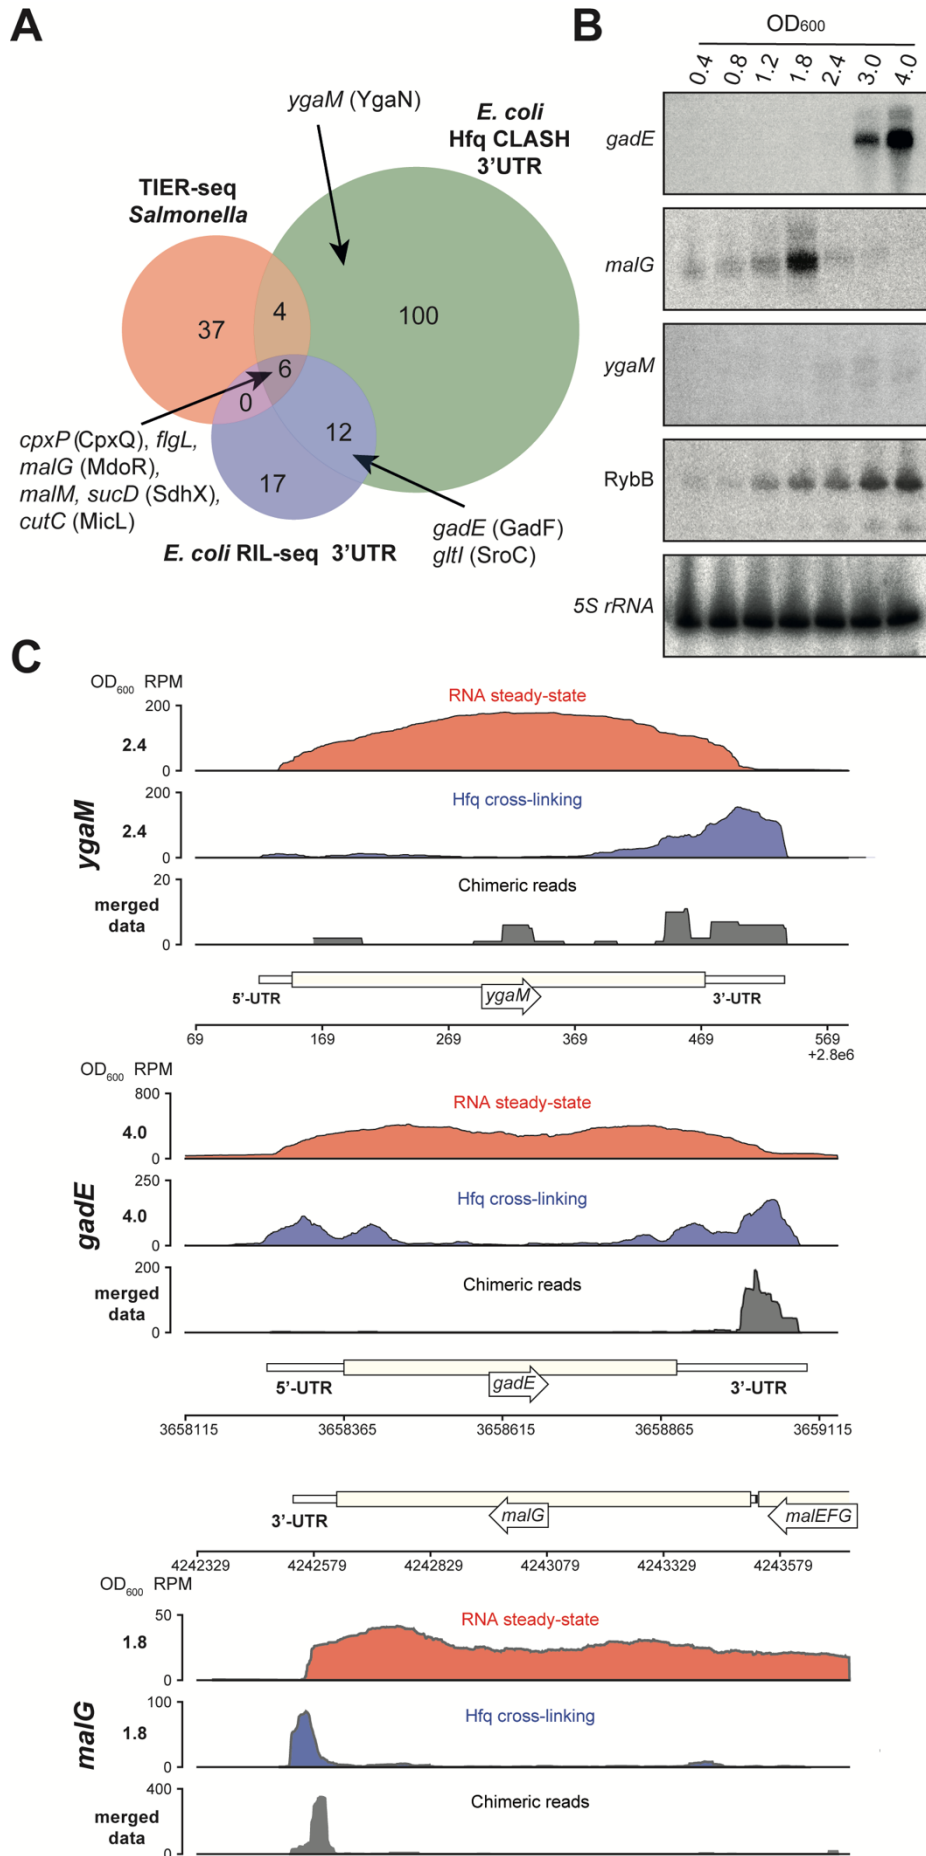

360 **Figure 5. Hfq CLASH uncovers novel 3'UTR-derived sRNAs.**

361 (A) Genes of which the 3'UTRs were found fused to mRNAs, were selected from the statistically filtered  
362 CLASH data and RIL-seq S-chimera data. The RIL-seq RNA-RNA interaction set (Melamed et al., 2016)  
363 S-chimeras for Log and Stationary phases of growth was filtered for the 3'UTR/EST3UTR annotations  
364 on either orientation of the mRNA-mRNA pairs. Both were intersected with the set of mRNAs that were  
365 predicted by TIER-seq studies (Chao et al., 2017) to harbour sRNAs that get released from 3'UTRs by  
366 RNase E processing. Known (CpxQ, SdhX, MicL, GadF and SroC) and novel 3'UTR derived sRNAs  
367 (MdoR, *figL* 3'UTR and YgaN) are indicated. (B) MdoR is transiently expressed during the transition  
368 from exponential to stationary phase. RybB was probed as a sRNA positive control and 5S rRNA as  
369 the loading control. See Figure 6-figure supplement 1 for full-size blots. Source data are provided as a  
370 Source Data file. (C) Genome-browser snapshots of several regions containing candidate sRNAs for  
371 optical densities at which the RNA steady-state was maximal for each candidate; the candidate names  
372 and OD<sub>600</sub> are indicated at the left side of the y-axes; the y-axis shows the normalized reads (RPM:  
373 reads per million); red: RPM of RNA steady-states from an RNA-seq experiment, blue: Hfq cross-linking  
374 from a CLASH experiment; black: unique chimeric reads found in this region.

375

376 We identified six mRNA 3'UTRs that were uncovered in all three (Hfq CLASH, RIL-seq  
377 and TIER-seq) datasets (Figure 5A), suggesting these likely contain sRNAs released from  
378 3'UTRs by RNase E processing. Northern blot analyses confirmed the presence of sRNAs in  
379 *malG* and *gadE* 3'UTRs (Figure 5B, Figure 5-figure supplement 1A). The latter was also  
380 recently experimentally confirmed in the RIL-seq data and was annotated as GadF (Melamed  
381 et al., 2016). Furthermore, significant Hfq cross-linking could be detected in the 3'UTRs of  
382 these transcripts (Figure 5C). In addition, we could show that the 3'UTR of *ygaM*, which was  
383 found in chimeric reads in our data, also likely harbours a ~100 nt sRNA (hereafter referred to  
384 as YgaN; Figure 5-figure supplement 1A) and robust Hfq cross-linking could be detected in  
385 this region (Figure 5B-C).

386 To substantiate these results, we analysed RNA-seq data from a study that used  
387 Terminator 5'-Phosphate Dependent Exonuclease (TEX) to map transcription start sites  
388 (TSS) of coding and non-coding RNAs in *E. coli* (Thomason et al., 2015). TEX degrades  
389 processed transcripts that have 5' monophosphates, but not primary transcripts with 5'  
390 triphosphates. Therefore, these data enabled us to determine whether (a) a TSS was detected  
391 in the 3'UTR and whether these were generated by RNase-dependent processing (TEX  
392 sensitive) or originated from an independent promoter (TEX insensitive). For 47 of the 122  
393 predicted 3'UTR-derived sRNAs TEX data provided strong evidence for the presence of  
394 sRNAs (Figure 5-figure supplement 1B-C, Supplementary Table 2.5 and see Data and Code  
395 availability). The TEX data indicate that *ygaM* has (at least) two promoters, one of which is  
396 located near the 3' end of the gene that we predict is the TSS for YgaN (Figure 5-figure  
397 supplement 1B). Furthermore, we speculate that YgaN is processed by RNases. This is based

398 on the observation that multiple YgaN species were detected in the Northern blot analyses  
399 (Figure 5-figure supplement 1A) and the TEX data indicate that shorter YgaN RNAs are  
400 sensitive to TEX treatment (Figure 5-figure supplement 1B).

401 The majority of the sRNAs we analysed are more abundant at higher cell densities  
402 (including GadF, YgaN and RybB; see Figure 5B, 2A). In sharp contrast, 3' UTR *malG* sRNA  
403 was expressed very transiently and peaked at an OD<sub>600</sub> of 1.8 (Figure 5B). We envisage that  
404 the particularly transient expression of this sRNA may be correlated with a role in the adaptive  
405 responses triggered during transition from exponential to stationary phases of growth. We  
406 named it MdoR (*mal*-dependent OMP repressor) and characterized it in detail.

407 The steady state levels of *malG* and *malEFG* transcripts recapitulate the same  
408 expression profile: both peak at OD<sub>600</sub> of 1.8 and drop to very low levels at OD<sub>600</sub> 2.4 (Figure  
409 6A). Additionally, we identified shorter *malG* 3'UTR-containing fragments of intermediate  
410 length between *malG* and MdoR that could be degradation intermediates (Figure 6B). The  
411 detection of these intermediate species suggests that the *malEFG* primary transcript is  
412 undergoing serial ribonucleolytic cleavage steps.

413 MdoR is a 104 nt sRNA that contains part of the *malG* coding sequence, including the  
414 stop codon and the Rho-independent terminator (Figure 5-figure supplement 1A-B). Two lines  
415 of evidence suggest that MdoR is generated via endonucleolytic cleavage: RNase E cleavage  
416 was detected in the 3'UTR of *malG* in the *Salmonella* TIER-seq data (Chao et al., 2017).  
417 Secondly, the TEX RNA-seq data supported the existence of a short RNA in the same region  
418 that has a 5' monophosphate (Figure 5-figure supplement 1B-C). We verified the MdoR TEX  
419 data by Northern blot analyses (Figure 6C). Consistent with the TEX RNA-seq data, MdoR  
420 could not be detected in our RNA samples treated with TEX (Figure 6C, lanes 2 and 4),  
421 confirming it bears a 5' monophosphate. Like MdoR, the positive control CpxQ (Chao and  
422 Vogel, 2016) was degraded in the presence of TEX (Figure 6C). In contrast, RybB, an sRNA  
423 with a 5' triphosphate transcribed from an independent promoter (Johansen et al., 2006;  
424 Papenfort et al., 2006) was a poor substrate for the exonuclease (Figure 6C).

425



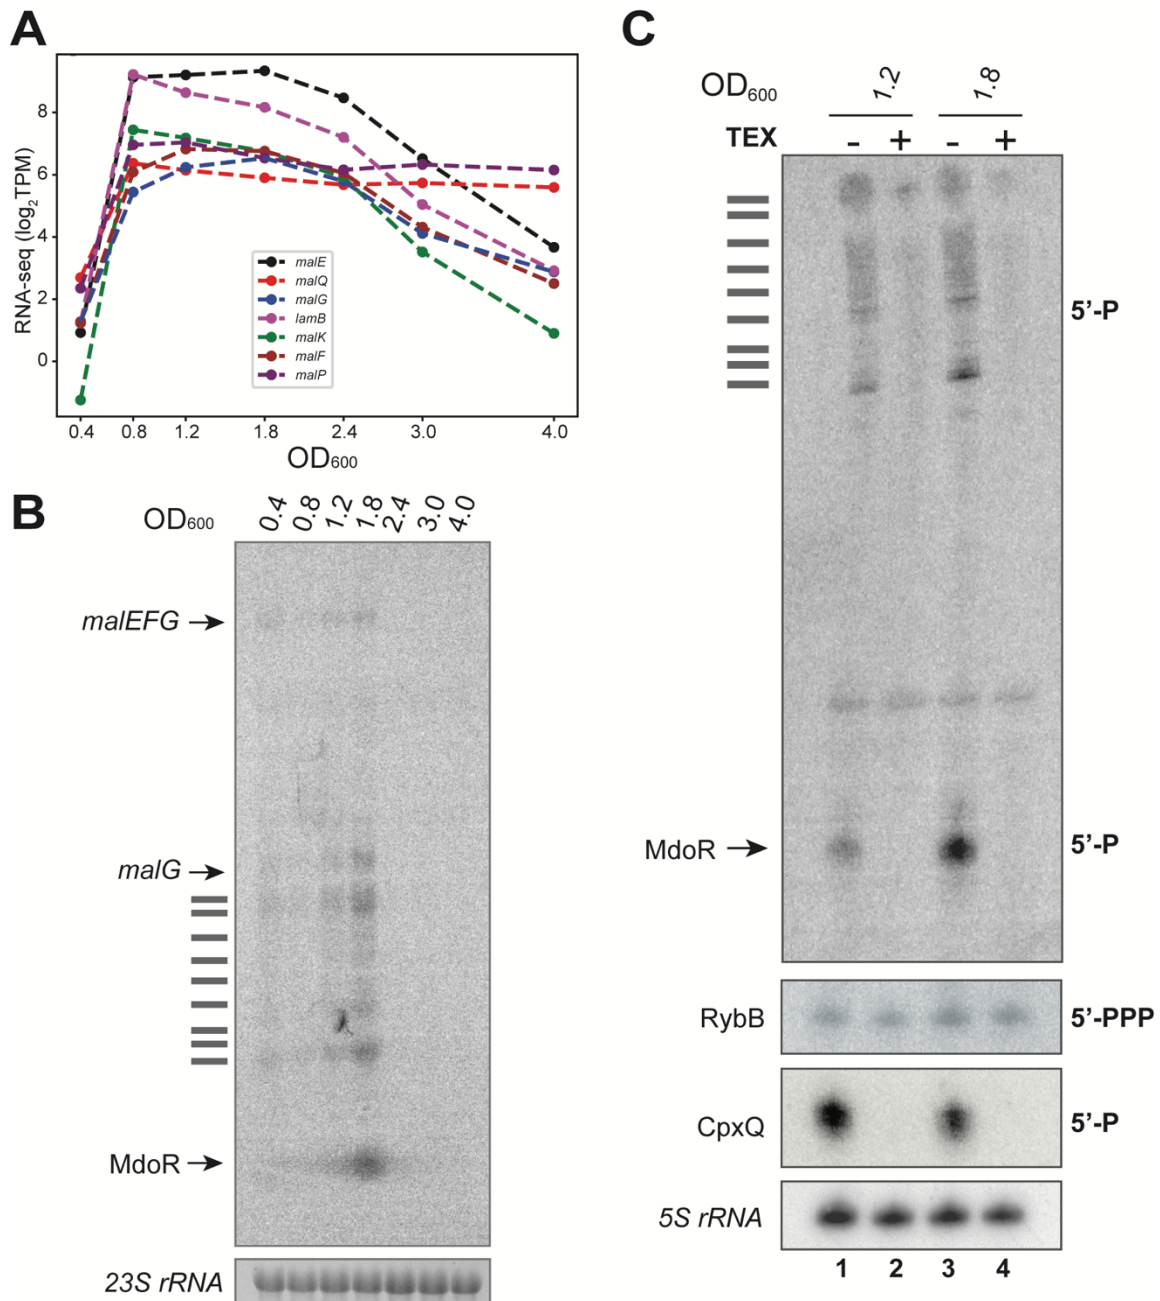

426

427 **Figure 6. MdoR is a degradation product that emerges at the transition between exponential and**  
 428 **stationary phase of growth.**

429 (A) The *mal* regulon gene expression peaks at the transition between exponential and stationary  
 430 phases of growth: the plot shows averages of log<sub>2</sub>(TPM) normalized RNA steady-state levels (y-axis);  
 431 the x-axis indicates the cell densities (OD<sub>600</sub>) at which samples were taken. (B) Northern blot using total  
 432 RNA from *E. coli* harvested at different cell densities (OD<sub>600</sub>) probed with an oligo antisense to *malG*  
 433 3'UTR; 23 S rRNA was used as the loading control; the identity of the bands is indicated at the left of  
 434 the panel; horizontal bars indicate *malEFG* degradation intermediates. (C) MdoR is a degradation  
 435 product: Northern blot using total RNA from cells at indicated OD<sub>600</sub> with (+; lanes 2 and 4) or without (-  
 436 ; lanes 1 and 3) 5'-Phosphate-Dependent Exonuclease (TEX) treatment. The sRNAs RybB (5'ppp) and  
 437 CpxQ (5'p) were used as negative and positive controls, respectively. The 5S rRNA is a loading control.

438 The text on the right of the blot indicates the phosphorylation state of the 5'-termini for each sRNA.

439

440         TEX treatment of the total RNA also reduced the levels of the longer intermediate  
441 species as well as the full-length *malG*. These data support a mechanism by which the full-  
442 length polycistronic RNA undergoes decay that is initiated at a site in the upstream *malEFG*  
443 region. The distal gene *malE* is clipped off by the degradosome and selectively stabilized,  
444 allowing it to be expressed at higher levels than other members of the operon (Newbury et al.,  
445 1987). The *malG* 3'UTR, however, would be less susceptible to degradation as it is stabilized  
446 by Hfq binding.

447

#### 448 **MdoR directly regulates the expression of major outer membrane porins and represses** 449 **the envelope stress response pathway**

450         The MdoR chimeras frequently contained 5'UTR fragments of two mRNAs encoding  
451 major porins, *ompC* and *ompA* (Figure 7A-C), which were also significantly enriched in the  
452 RIL-seq data (Figure 8B). The Hfq CLASH data, however, also contained MdoR fragments  
453 fused to a *cis*-encoded sRNA, OhsC (Figure 7B-C), suggesting that either MdoR controls its  
454 expression by sponging/degradation, or *vice versa*). The most abundant and favourable  
455 interactions of MdoR with mRNAs (*ompC* and *ompA*) appear to be utilizing roughly the same  
456 region of the *malG* 3'UTR for base-pairing (Figure 7C), suggesting that the corresponding site  
457 on the predicted sRNA may be a main, functional seed. The predicted interaction between  
458 MdoR and *ompC* is unusually long and consists of two stems interrupted by a bulge,  
459 suggesting that these two RNAs form a stable complex. Conservation analyses and *in silico*  
460 target predictions (CoproRNA (Wright et al., 2014, 2013)) indicate that the seed sequence  
461 predicted by CLASH is relatively well-conserved (Figure 7-figure supplement 1A), and could  
462 be utilized for the regulation of multiple targets (Figure 7-figure supplement 1B).

463         To verify the MdoR CLASH data we pulse-overexpressed the sRNA from a plasmid-  
464 borne arabinose inducible promoter followed by RNA sequencing (Figure 7D-E). To minimize  
465 secondary changes in gene expression, cells were harvested after only 15 minutes of MdoR  
466 induction. Note that induction was performed at OD<sub>600</sub> = 0.4, when endogenous levels of MdoR  
467 are very low. As a control we used cells harbouring an empty vector. Differential gene  
468 expression analysis (DESeq2 (Love et al., 2014)), identified ~20 transcripts that were  
469 significantly enriched in the control data compared to the MdoR overexpression data (Figure  
470 7E-F; Supplementary Table 4). Thus, these transcripts are likely downregulated by MdoR *in*  
471 *vivo*. This set of transcripts included the sigma factor *rpoE* ( $\sigma^E$ ), which plays an important role  
472 in controlling gene expression during stress responses, including envelope stress (Alba and  
473 Gross, 2004; Bossi et al., 2008; De Las Peñas et al., 1997; Rhodius et al., 2006). The  
474 observed reduction in mRNA levels of the anti- $\sigma^E$  protein RseA can be explained by the fact

475 that  $\sigma^E$  and RseA are encoded by the same operon.

476

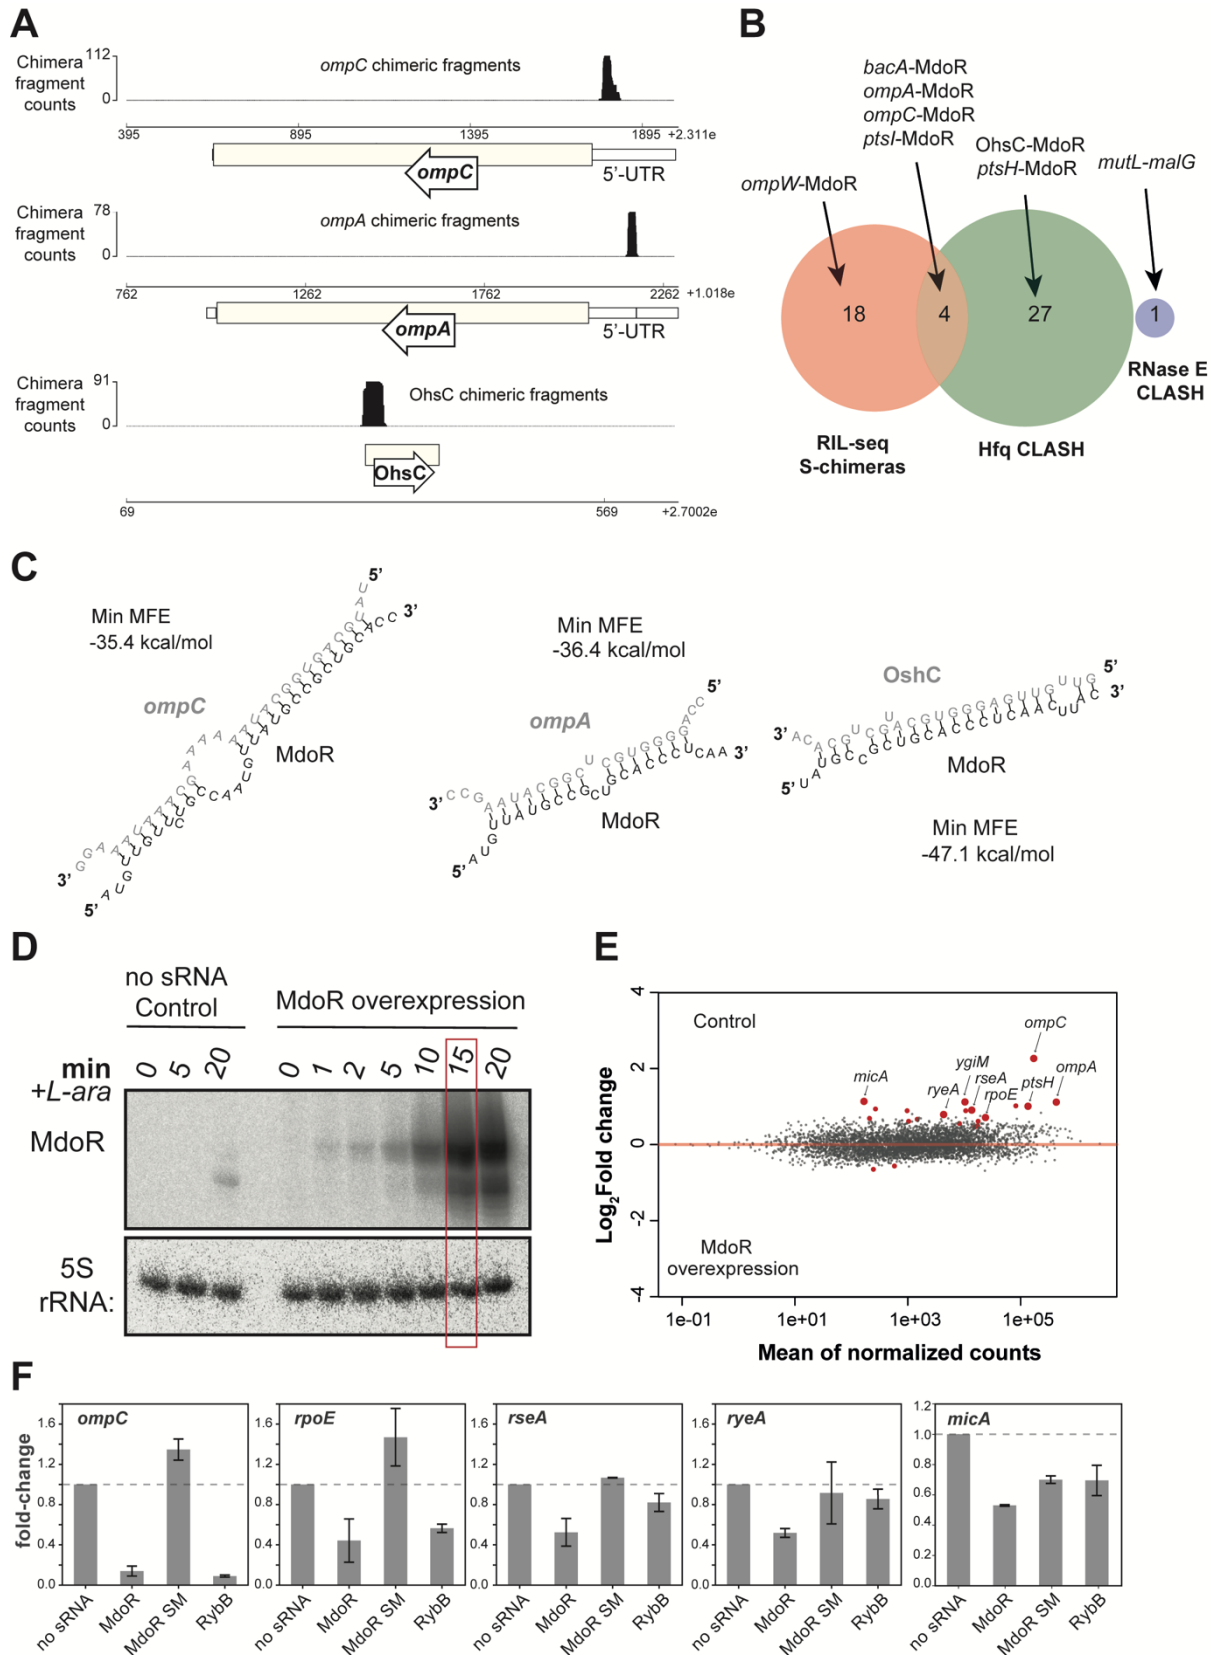

477

478 **Figure 7. MdoR destabilizes *ompC* and *ompA* mRNAs and downregulates key members the  $\sigma^E$**   
 479 **regulon.**



480 (A) The three genome browser tracks show the distribution of target mRNA and sRNA fragments  
481 (*ompC*, *ompA* and *OhsC*) that were fused to MdoR fragments in chimeric reads. (B) MdoR-target  
482 interactions found in Hfq CLASH, RIL-seq S-chimera data (log and stationary phase) and RNase E  
483 CLASH data. (C) MdoR forms stable duplexes with the 5'UTR of porin-encoding mRNAs and the *OhsC*  
484 sRNA. *In silico* prediction (RNAcofold (Lorenz et al., 2011)) of hybrid structures derived from the most  
485 abundant MdoR chimeric reads with the indicated transcripts. The min. MFE is the minimum folding  
486 energy assigned by RNAcofold. (D) Pulse-overexpression of MdoR using L-arabinose. The empty  
487 pBAD plasmid served as a negative control. Samples were harvested 15-minutes after induction. (E)  
488 MdoR regulates expression of various mRNAs. DESeq2 analyses were performed on RNA-seq data  
489 from three biological replicates. Red points indicate differentially expressed transcripts. Transcripts with  
490 a  $\log_2$  fold-change  $> 0$  were enriched in the Control data; those with a  $\log_2$  fold-change  $< 0$  were enriched  
491 in the MdoR overexpression data. The annotated, enlarged red data points indicate several differentially  
492 expressed transcripts discussed in the text. (F) The MdoR seed region is important for target regulation.  
493 RT-qPCR analysis of several differentially expressed transcripts (gene names shown at the top of the  
494 plots), in the presence of sRNAs. The plasmid-borne sRNAs were induced for 15 minutes using L-  
495 arabinose. The sRNA names are indicated below each bar; the 'no sRNA' sample contains the empty  
496 plasmid as reference for fold-change calculations; *recA* was used as the internal reference gene;  
497 experiments were performed in technical triplicates; the standard error of the mean (SEM) of two  
498 biological replicates are reported as error bars.

499

500 Intriguingly, MdoR overexpression also reduced the levels of sRNAs *RyeA* and *MicA*,  
501 the latter of which depends on  $\sigma^E$  for its expression (Udekwu and Wagner, 2007). In  
502 *Salmonella*, *MicA* downregulates *LamB*, a high affinity maltose/maltodextrin transporter (Bossi  
503 and Figueroa-Bossi, 2007). Fragments of three mRNAs (*ompC*, *ompA* and *ptsH*) that were  
504 found in MdoR chimeric reads were also differentially expressed in the MdoR overexpression  
505 RNA-seq data, providing strong evidence that these are direct MdoR targets.

506 All the available data suggest that MdoR is part of a mixed coherent feed forward  
507 regulatory network (FFL) that enhances the uptake of maltose/maltodextrin by maltose  
508 transporters (see Discussion). By base-pairing with the 5'UTRs of the mRNAs it firstly reduces  
509 the flux of the more general porins such as *OmpC* and *OmpA* to the outer membrane.  
510 Secondly, we propose that MdoR stimulates the accumulation of the high-affinity maltose porin  
511 *LamB* in the OMP by suppressing the inhibitory  $\sigma^E$  pathway and *MicA*. To further test this  
512 model, we performed additional validation experiments. First, we confirmed the DESeq2  
513 results for a number of the regulated genes (*ompC*, *rpoE*, *micA* and *ryeA*) by RT-qPCR (Figure  
514 7F). We included an MdoR mutant in which seed sequence in stem 1 was changed into its  
515 complementary sequence (Figure 8-figure supplement 1A). As control we also included the  
516 *RybB* sRNA, which regulates *rpoE* and *ompC* expression (Gogol et al., 2011; Papenfort et al.,  
517 2006; Thompson et al., 2007). In all cases, the MdoR SM mutations reduced the negative

518 regulatory effect on target expression (Figure 7F).

519 To demonstrate direct target regulation *in vivo*, we employed a well-established  
520 reporter system where an sRNA is co-expressed with a construct containing the mRNA target  
521 region fused to the coding sequence of superfolder green fluorescent protein (sfGFP)  
522 (Corcoran et al., 2012; Urban and Vogel, 2007) (Figure 8-figure supplement 1B). Fusions for  
523 *ompC*, *ompA* and  $\sigma^E$  were constructed, but only the OmpC and OmpA-sfGFP reporters  
524 produced stable fusions that could be analysed. We also included an MdoR sRNA seed  
525 sequence mutant (MdoR SM) and an *ompC* mutant containing compensatory mutations  
526 (OmpC SM; Figure 8-figure supplement 1A). Unfortunately, our OmpA-GFP reporter construct  
527 that contained compensatory mutations in the target region did not generate a stable fusion.  
528 Therefore, we were unable to use this reporter system to verify the MdoR-*ompA* interaction.  
529 As positive controls we used the MicC and RybB sRNAs as they both regulate *E. coli ompC*  
530 expression (Chen et al., 2004; Gogol et al., 2011). Fluorescence measurements confirmed  
531 that levels of OmpC-sfGFP and OmpA-sfGFP fusions were significantly lower in cells  
532 expressing MdoR (Figure 8-figure supplement 1C). Importantly, MdoR overexpression did not  
533 change the expression of the GFP reporter itself (Figure 8-figure supplement 1C). Mutating  
534 the MdoR seed region largely restored OmpA- and OmpC-sfGFP reporter levels to the levels  
535 of the no sRNA negative control. The MdoR SM mutant was still able to partially suppress the  
536 expression of the OmpC SM-sfGFP mutant, suggesting that base-pairing interactions between  
537 these two mutants is less stable compared to the wild-type (Figure 8-figure supplement 1C).  
538 The wild-type MdoR was also able to partially suppress the expression of the *ompC* SM  
539 mutant. We suggest that the predicted base-pairing interactions between MdoR and *ompC* in  
540 the second stem (Figure 8-figure supplement 1A) might be sufficient to partially suppress  
541 *ompC* expression. Regardless, the data strongly imply that MdoR directly regulates *ompC*  
542 expression.

543 To determine whether the changes in fluorescence signal correlate with changes in  
544 reporter mRNA levels, we measured the expression of the GFP reporters by RT-qPCR. The  
545 results were essentially identical to the GFP fluorescence measurements (Figure 8A);  
546 Overexpression of the wild-type MdoR, but not seed mutant, reduced *ompC*-sfGFP mRNA  
547 levels. The *ompC* seed mutation (SM) did not fully disrupt regulation by wild-type MdoR.  
548 However, the MdoR mutant containing compensatory mutations (SM mutant) was able to  
549 much better suppress the *ompC* SM mRNA levels, consistent with the idea that base-pairing  
550 was (largely) restored. Next, we performed polysome profiling experiments to assess the level  
551 of *ompC* translation upon overexpression of MdoR. Although MdoR overexpression did not  
552 noticeably affect 70S and polysome levels (Figure 8-figure supplement 2A), we observed a  
553 significant (~37%) reduction of *ompC* mRNA in the polysomal fractions, relative to the upper  
554 fractions (Figure 8-figure supplement 2B). We conclude that MdoR can regulate *ompC*

555 expression at the post-transcriptional and translational level.

556

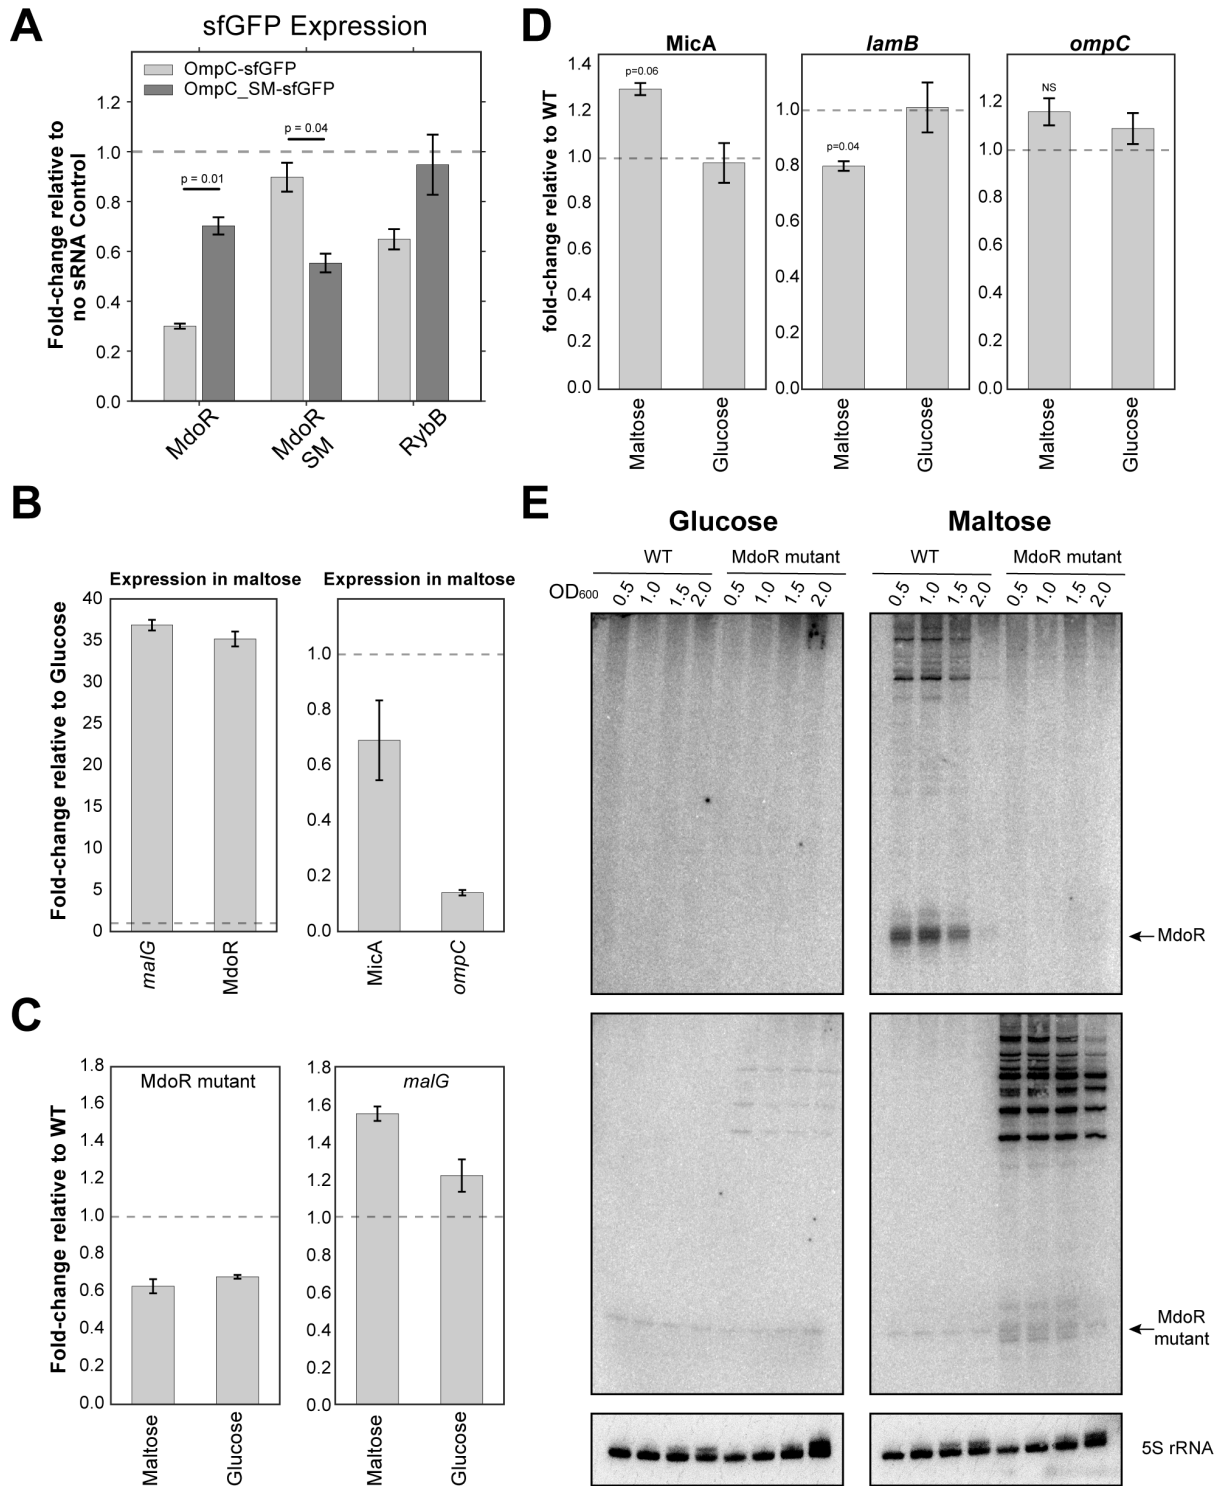

557

558

559 **Figure 8. MdoR modulates expression of key factors involved in maltose intake.**

560 (A) MdoR directly downregulates *ompC* mRNA through base-pairing interactions: RT-qPCR analyses  
 561 of the *ompC-sfGFP* and *ompC SM-sfGFP* fusions expression in the presence of MdoR. The bars  
 562 indicate the mean fold-change in expression relative to the no sRNA Control (horizontal dashed line).

563 Error bars indicate the standard error of the mean from two biological replicates. The significance of the  
564 differences between the WT and MdoR SM was assessed with a two-tailed Student's t-test. **(B)**  
565 Endogenous MdoR and *malG* expression is induced during growth on maltose, and *ompC* levels are  
566 significantly lower in maltose compared to glucose. Total RNA extracted from exponentially growing  
567 cells (OD<sub>600</sub> 0.5) and MdoR, *malG* (Left), and MdoR direct (*ompC*) and indirect (MicA) targets was  
568 quantified by RT-qPCR. The data were normalized to 5S rRNA levels. The bars indicate the mean fold-  
569 change in expression relative to expression in cells growing in glucose (indicated on the plot with a  
570 horizontal dashed line). Error bars indicate the standard error of the mean from two biological replicates.  
571 **(C)** The mutant MdoR is ~50% less abundant than the wild-type. Cell growth and RT-qPCR analysis  
572 of MdoR and *malG* expression was performed as in (b). The bars indicate the mean fold-change in  
573 expression relative to the wild-type. Error bars indicate the standard error of the mean from two  
574 biological replicates. **(D)** Increased MicA and decreased *lamB* levels in the MdoR seed mutant. P-values  
575 were calculated using with a one-sample t-test. **(E)** MdoR seed sequences are important for RNase E  
576 recruitment and MdoR biogenesis. Northern blot that compares MdoR and longer *malG*-3'UTR  
577 containing fragments expression in wild-type *E. coli* and the MdoR seed mutant strain.

578

### 579 **MdoR enhances maltoporin expression during maltose fermentation**

580 To further substantiate these results, we next switched to a more controlled system to  
581 investigate the effect of endogenous MdoR on its targets. To determine whether MdoR has a  
582 role in adaptation to maltose-metabolising conditions, single overnight cultures grown in  
583 glucose were split and (re)inoculated in fresh medium containing either glucose or maltose as  
584 the sole carbon sources, and expression of several *mal* regulon genes and MdoR targets were  
585 quantified. We show that MdoR and its parental transcript *malG* are almost undetectable  
586 during growth in glucose, and highly expressed during growth in maltose (~35-fold increase,  
587 Figure 8B). This is consistent with catabolite repression of the *mal* regulon by glucose, and its  
588 induction by maltose (Boos and Shuman, 1998). Intriguingly, we observed that *ompC* mRNA  
589 levels are overall significantly lower during growth in maltose, compared to glucose (Figure  
590 8B). This suggests that porin expression is also regulated by nutrient source in *E. coli*.  
591 Similarly, MicA, a repressor of LamB synthesis, has reduced levels in maltose compared to  
592 glucose (Figure 8B). We next mutated the entire seed sequence of the chromosomal copy of  
593 MdoR (both stem 1 and 2; Figure 8-figure supplement 1A) in the chromosomal context, to  
594 completely disrupt base-pairing with *ompC* mRNA. Notably, the fully-processed mutant MdoR  
595 sRNA is less abundant than the wild-type (Figure 9C) and longer (unprocessed) fragments  
596 that contain upstream *malG* regions could be readily detected (Figure 9E). We speculate that  
597 the mutation in the upstream MdoR sequence might have affected RNase E recruitment or  
598 cleavage, impairing MdoR processing. The MdoR mutant strain also accumulated significantly  
599 higher levels of MicA (Figure 8D) and less *lamB*. Levels of *ompC* mRNA levels were also

600 slightly elevated in the mutant in maltose relative to the parental strain, although in this case  
601 a similar increase was also observed in glucose.

602 Collectively, the data suggest a role for MdoR in enhancing the uptake of maltose when  
603 more favourable carbon sources become limiting.

## 604 605 **Discussion**

606  
607 Microorganisms need to constantly adapt their transcriptional program to counteract  
608 changes in their environment, such as changes in temperature, cell density and nutrient  
609 availability. In bacteria, small RNAs (sRNAs) and their associated RNA-binding proteins are  
610 believed to play a key role in this process. By controlling translation and degradation rates of  
611 mRNAs upon stress imposition (Holmqvist and Wagner, 2017; Nitzan et al., 2017; Shimoni et  
612 al., 2007), they can regulate the kinetics of gene expression as well as suppress noisy signals  
613 (Beisel and Storz, 2011), enabling organisms to more efficiently adapt to environmental  
614 changes. A major challenge for bacteria is the transition from exponential growth to stationary  
615 phase, when the most favourable nutrients become limiting. To counteract this challenge, cells  
616 need to rapidly remodel their transcriptome to be able to efficiently metabolize alternative  
617 carbon sources. This transition is very dynamic and involves activation and repression of  
618 diverse metabolic pathways. However, it is unclear to what degree sRNAs contribute to this  
619 transition. The most useful piece of information would be to know what sRNAs are upregulated  
620 during this transition phase and to identify their RNA targets. This would help to uncover the  
621 regulatory networks that govern this adaptation, as well as provide a starting point for more  
622 detailed functional analyses on sRNAs predicted to play a key role in this process. For this  
623 purpose, we performed UV cross-linking, ligation and sequencing of hybrids (CLASH (Kudla  
624 et al., 2011)) to unravel the sRNA-target interactions during this transition. Using Hfq as a bait  
625 we uncovered thousands of unique sRNA-target interactions. Our data are consistent with  
626 previously published work (Melamed et al., 2016; Waters et al., 2016) but we also identified  
627 almost 1700 novel sRNA-mRNA interactions and over 100 novel sRNA-sRNA interactions.  
628 We experimentally validated several of the interactions found in our CLASH findings. We  
629 identified functional sRNA-sRNA interactions and describe a novel 3'UTR derived sRNA that  
630 plays a role in enhancing uptake of an alternative carbon source during the transition to  
631 stationary phase.

632  
633  
634  
635



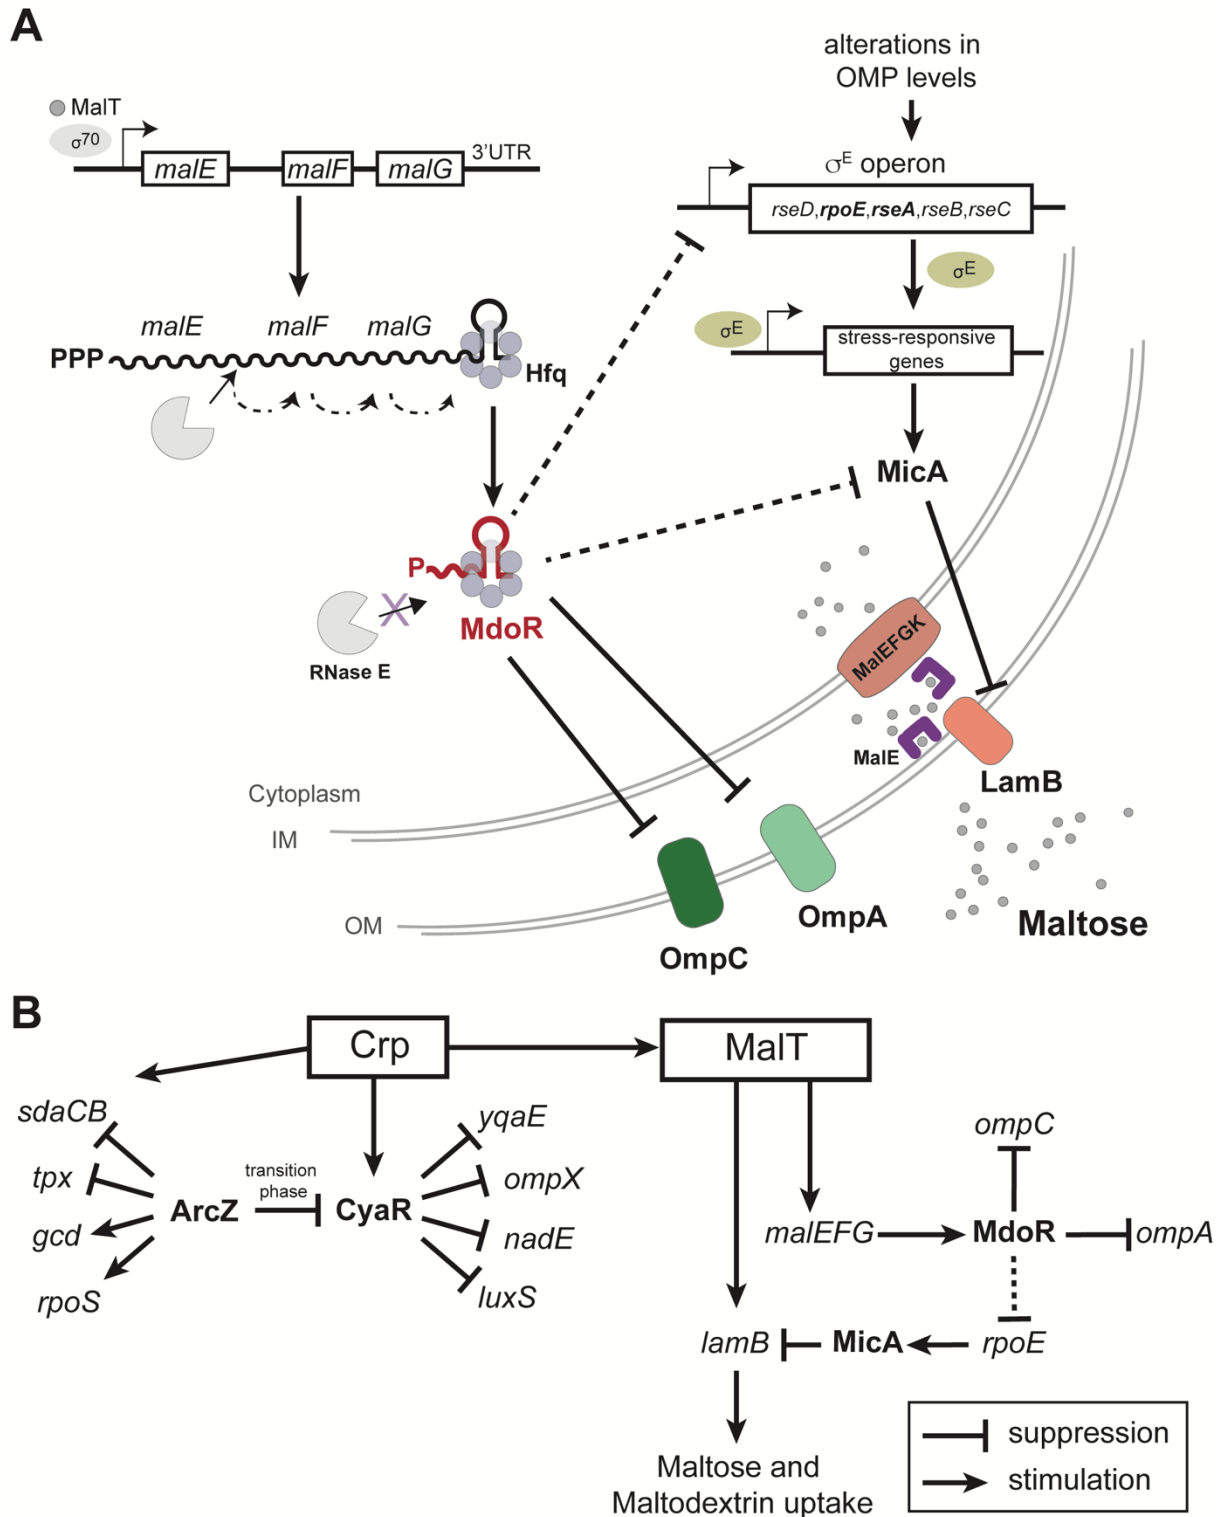

644 (FFL), MdoR promotes accumulation of maltose specific porins, which facilitates maltodextrin uptake.  
645 Increased production of LamB exerts additional pressure on the OM assembly machinery. This  
646 extracytoplasmic stress, is suppressed by  $\sigma^E$  activation, that controls the expression of stress-  
647 responsive genes and most of the assembly and insertion factors. But  $\sigma^E$  activation is not desirable in  
648 these conditions for two reasons: its unbalanced activation has precarious effects on the cell, and would  
649 produce high amounts of MicA, that would ultimately repress LamB production. For these reasons,  
650 MdoR regulation includes a regulatory arm that mitigates excessive  $\sigma^E$  response through MdoR  
651 repression of *rpoE* expression and prevention of  $\sigma^E$  activation. The latter is achieved by downregulation  
652 of *omp* mRNAs, which indirectly relieves envelope stress. **(B)** sRNA-target networks regulating  
653 peptide/amino acids and maltose/maltodextrin uptake. Boxed are the key transcription factors, sRNAs  
654 are in bold and italicized names are mRNA targets. CRP-cAMP induces expression of CyaR, which is  
655 repressed by ArcZ, specifically during the transition phase, a regulatory circuit that connects multiple  
656 pathways related to the onset of stationary phase and biofilm formation to quorum sensing, cellular  
657 adherence and the nutritional state of the cell. MalT transcribes *lamB* and, via *malEFG* transcription,  
658 promotes MdoR accumulation. MdoR indirectly promotes LamB synthesis by repressing the opposing  
659  $\sigma^E$  pathway and its sRNA, MicA. Thus, MalT and MdoR jointly promote *lamB* expression, forming a  
660 mixed coherent FFL.

661

## 662 **Hfq CLASH**

663 Our *S. cerevisiae* Cross-linking and cDNA analysis data (CRAC; (Granneman et al.,  
664 2009)) showed that a percentage of the cDNAs were formed by intermolecular ligations of two  
665 RNA fragments (chimeras) known to base pair *in vivo* (Kudla et al., 2011). These findings  
666 prompted us to develop a refined protocol to enrich for sRNA-target chimeric reads using Hfq  
667 as an obvious bait. The initial Hfq UV cross-linking data (CRAC; (Tree et al., 2014)) did not  
668 yield sufficiently high numbers of chimeric reads to extract new biological insights. In line with  
669 observations from other groups (Bandyra et al., 2012; Bruce et al., 2018; Morita et al., 2005),  
670 it was proposed that duplexes formed by Hfq are rapidly transferred to the RNA degradosome  
671 (Bandyra et al., 2012; Bruce et al., 2018; Morita et al., 2005). This can cause an extensive  
672 reduction in the likelihood of capturing sRNA-target interactions with Hfq using CLASH  
673 (Waters et al., 2016). However, a recent study demonstrated that Hfq can be used effectively  
674 as a bait to enrich for sRNA-target duplexes under lower-stringency purification conditions  
675 suggesting that sRNA-mRNA duplexes are sufficiently stable on Hfq during purification  
676 (Melamed et al., 2016). This encouraged us to further optimize the CLASH method. We made  
677 a number changes to the protocol that, when combined, enabled us to recover a large number  
678 of sRNA-target chimeric reads (detailed in Materials and Methods). We shortened various  
679 incubation steps to minimize RNA degradation and performed very long and stringent washes  
680 after bead incubation steps to remove background binding of non-specific proteins and RNAs.  
681 Crucially, we very carefully controlled the RNase digestion step that is used to trim the cross-

682 linked RNAs prior to making cDNA libraries, ensuring the recovery of longer chimeric RNA  
683 fragments. The resulting cDNA libraries were paired-end sequenced to increase the recovery  
684 of chimeric reads with high mapping scores from the raw sequencing data. These  
685 modifications led to a substantial improvement in the recovery of chimeric reads (9.5%  
686 compared to 0.001%. 0.71% were intermolecular chimeras).

687 Both RIL-seq and Hfq CLASH have advantages and disadvantages, but they are highly  
688 complementary approaches. A major strength of CLASH, however, is that the purification  
689 steps are performed under highly stringent and denaturing conditions. During the first FLAG  
690 affinity purification steps the beads are extensively washed with high salt buffers and the  
691 second Nickel affinity purification step is done under completely denaturing conditions (6M  
692 guanidium hydrochloride). These stringent purification steps enable can significantly reduce  
693 noise by strongly enriching for RNAs covalently cross-linked to the bait protein (Granneman  
694 et al., 2009). Indeed, we show that Hfq CLASH can generate high quality RNA-RNA interaction  
695 data with very low background: Only a few hundred chimeric reads were found in control  
696 datasets, compared to the over 70,000 that co-purified with Hfq. The RIL-seq library  
697 preparation protocol uses an rRNA depletion step to remove contaminating ribosomal RNA,  
698 whereas for Hfq CLASH this is not necessary. Our library preparation protocol also includes  
699 the use of random nucleotides in adapter sequences to remove potential PCR duplicates  
700 (“collapsing”) from the data.

701 The very stringent purification conditions used in CLASH could, in some cases also be  
702 a disadvantage as it completely relies on UV cross-linking to isolate directly bound RNAs. In  
703 cases where protein-RNA cross-linking efficiencies are low (for example proteins that only  
704 recognize double-stranded RNA), RIL-seq may be a better approach as it does not completely  
705 rely on UV cross-linking (Melamed et al., 2016).

706 A large number of interactions were unique to both RIL-seq and Hfq CLASH datasets,  
707 which we believe can be explained by a number of technical and experimental factors. The  
708 denaturing purification conditions used with CLASH completely disrupts the Hfq hexamer  
709 ((Tree et al., 2014) and this work) and therefore during the adapter ligation reactions the RNA  
710 ends are likely more accessible for ligation. In support of this, in the RIL-Seq data, the sRNAs  
711 are mostly found in the second half of the chimeras (Melamed et al., 2016), in the Hfq CLASH  
712 data we see sRNAs fragments roughly equally distributed in both sides (45% in left fragment  
713 and 55% in right fragment). Indeed, it was proposed that in RIL-seq the 3' end of the sRNA is  
714 buried in the hexamer and therefore not always accessible for ligation (Melamed et al., 2016).

715 For the RIL-seq experiments, the authors harvested the cells at 4°C and they  
716 resuspend the cells in ice-cold PBS prior to UV irradiation (Melamed et al., 2018, 2016), which  
717 results in a cold-shock that can affect the sRNA-interactome as well as sRNA stability. We  
718 cross-link actively growing cells in their growth medium and we UV irradiate our cells only for



719 several seconds using the Vari-X-linker we recently developed (van Nues et al., 2017). We  
720 use filtration devices to rapidly harvest our cells (less than 30 seconds) and the filtered cells  
721 are subsequently stored at -80°C. We previously showed that filtration combined with short  
722 UV cross-linking times dramatically reduces noise introduced by the activation of the DNA  
723 damage response and significantly increased the recovery of short-lived RNA species (van  
724 Nues et al., 2017). We speculate that many of the interactions that are unique to our Hfq  
725 CLASH data represent short-lived RNA duplexes that are preferentially captured with our UV  
726 cross-linking and rapid cell filtration setup.

727

### 728 **The 3'UTR derived sRNA MdoR functions in a mixed feed forward loop by suppressing** 729 **opposing pathways**

730 We found a large number of chimeras that represent over a hundred distinct  
731 intermolecular interactions between 3'UTRs and other mRNA regions, which implicate direct  
732 mRNA-mRNA communication. These interactions could have been formed by 3'UTR  
733 fragments that have been processed by RNase E (or other RNases) or by an sRNA located  
734 within the 3'UTR that transcribed from an internal promoter. These 3'UTR fragments are  
735 primarily described as decoys or sponges for other sRNAs (Miyakoshi et al., 2015b), but could  
736 act as *trans*-acting sRNAs as well (Chao and Vogel, 2016). Among the interactions in our data  
737 we found 79 interactions between 3'UTRs and 5'UTRs (Supplementary Table 2.6). We  
738 speculate that many of these represent novel 3'UTR-derived sRNAs that target 5'UTRs of  
739 mRNAs. Reanalysis of RNA-seq data from a study that globally mapped *E. coli* transcription  
740 start sites (TSS) (Thomason et al., 2015) identified 47 TSS in these 3'UTR, strongly  
741 suggesting that these 3'UTRs host sRNAs. The majority of these 3'UTR fragments appear to  
742 have 5' monophosphates. We also verified some of our findings by Northern blot analyses.  
743 Thus, we have potentially uncovered many novel 3'UTR-derived sRNAs.

744 Some of these predictions were validated by our follow up work (discussed below) and,  
745 while this work was in progress, also by others (Melamed et al., 2016). One of the 3'UTR-  
746 derived sRNAs we uncovered (MdoR) was of particular interest as it is only detected during  
747 the transition from late exponential to early stationary phase. A model of how MdoR  
748 contributes to maltose uptake is shown in Figure 9A.

749 The genetic structure and transcriptional regulation of the *mal* regulon are well  
750 understood. However, its post-transcriptional regulation has remained largely unexplored. Our  
751 work uncovered new links between the maltose uptake (*mal*) regulon, envelope stress-  
752 responses and membrane composition/assembly pathways. While initially cells metabolize  
753 more favourable carbon sources such as glucose, these are generally rapidly depleted and  
754 bacteria need to quickly switch to alternative carbon sources, such as maltose and  
755 maltodextrins. During maltose utilisation, the *malEFG* operon is transcribed by the MalT

756 transcription factor and the transcript is processed by RNase E as well as other degradosome  
757 components (Khemici and Carpousis, 2004). Here we show that the MdoR sRNA is a product  
758 of *malEFG* processing, which is protected from further degradation by Hfq.

759 MdoR is unique in a sense that it not only a 3'UTR derived sRNA that targets multiple  
760 pathways, but also because it is part of a mixed coherent feed forward loop (FFL) that we  
761 predict promotes maltose uptake via LamB. Efficient uptake of maltose/maltodextrin not only  
762 requires the inner membrane transporters encoded by the *malEFG* operon, but also the high-  
763 affinity maltose transporter LamB (Figure 9A), which cooperates with the inner membrane  
764 proteins to import these carbon sources. *lamB* is significantly upregulated when cells start to  
765 utilize alternative carbon sources. A major advantage of a coherent FFL is that it can  
766 accelerate or delay responses to stimuli, such as changes in carbon source availability. In this  
767 FFL, the key activator is the MalT transcription factor, which induces the expression of both  
768 *malEFG* and *lamB* when cells start to consume maltose (Figure 9B). Expression of new OMPs,  
769 however, needs to be carefully coordinated as any changes in the protein composition of the  
770 OM, such as increased levels of LamB (or accumulation of misfolded LamB in the periplasm),  
771 can lead to induction of the  $\sigma^E$  envelope stress response caused by the reorganisation of the  
772 membrane when maltodextrins are utilised (Figure 9A)(Kenyon et al., 2005). We propose that  
773 *malEFG* indirectly promotes LamB accumulation via the MdoR sRNA that (a) reduces the  
774 levels of general porins (OmpC and OmpA) and (b), likely indirectly, dampens the  $\sigma^E$  stress  
775 response as a result of OMP level reduction. Dampening  $\sigma^E$  expression important during  
776 maltose uptake as it induces the expression of MicA, which directly downregulates *lamB*  
777 translation (Bossi and Figueroa-Bossi, 2007). When ectopically expressed at high levels,  
778 MdoR reduces mRNA levels of *ompC* and *ompA*, which may free up the resources enabling  
779 efficient accumulation of LamB in the outer membrane. At physiological levels MdoR  
780 significantly reduces MicA expression and we observed a ~20% increase in *lamB* mRNA  
781 levels. *OmpC* mRNA levels were not substantially affected. While these changes appear  
782 modest, it is important to take into consideration the very high abundance and intrinsic stability  
783 of *lamB* and *ompC* mRNAs (minute-long half-lives). It is therefore expected that even a mild  
784 reduction in their mRNA levels can profoundly relieve the pressure on the OMP translation  
785 and assembly pathways (Guo et al., 2014). The net outcome of *mal* regulon transcription,  
786 MdoR biogenesis and regulatory activity, is increased expression of high-affinity components  
787 of maltose-specific transport (MalE and LamB).

788 MdoR is reminiscent of the *Vibrio cholerae* MicX sRNA that also mapped to the 3'  
789 region of *malG* and regulates levels of outer membrane proteins (Davis and Waldor, 2007).  
790 However, the MicX targets are different from MdoR. Furthermore, unlike MdoR, MicX is  
791 produced from an independent promoter: Conditions that change the expression of the

792 upstream Mal operon in *V. cholerae* do not affect accumulation of MicX (Davis and Waldor,  
793 2007), whereas the levels of MdoR strongly correlate with *malEFG* mRNA levels.  
794 Nevertheless, both studies demonstrate that an sRNA resides in the 3'UTR of the *malG*  
795 transcript and pinpoint a mechanism where the expression of multiple porins is regulated by  
796 sRNAs encoded within transporter mRNAs.

797

## 798 **CLASH reveals large sRNA-sRNA interaction networks.**

799 Our analyses unearthed an unexpectedly large number (>100) of sRNA-sRNA  
800 interactions. The majority of these interactions involved known sRNA seed sequences,  
801 suggesting that these could represent *bona fide* interactions that prevent sRNAs from base-  
802 pairing with their targets or result in the degradation of the sRNAs. About 40 sRNA-sRNA  
803 interactions involving sRNAs from the core genome were detected in the RNase E CLASH  
804 dataset, about a quarter of which were also detected in our Hfq data. The relatively low overlap  
805 between the datasets is not surprising, given the differences in the growth conditions  
806 (virulence inducing conditions for enterohaemorrhagic *E. coli* vs growth transitions for  
807 commensal *E. coli* MG1655). Moreover, many of the sRNA-sRNA interactions recovered in  
808 association with RNase E are likely duplexes in the process of being degraded. Many of the  
809 sRNA-sRNA interactions unique to our Hfq data may represent interactions between anti-  
810 sRNAs and seed sequences of sRNAs which may not necessarily involve recruitment/activity  
811 of RNase E.

812 The chimeras containing CyaR fragments were of particular interest as CyaR is  
813 preferentially expressed during the transition from late exponential to stationary phase (De  
814 Lay and Gottesman, 2009; Wassarman et al., 2001) and may therefore play an important role  
815 in adaptation to nutrient availability. We could show that overexpression of ArcZ, which base-  
816 pairs with CyaR in our CLASH data, significantly reduced CyaR levels (Figure 9B). Using seed  
817 mutants and compensatory mutations, we confirmed direct interactions between ArcZ and  
818 CyaR and our data suggests that this interaction specifically takes place during the transition  
819 phase. Interestingly in *Salmonella*, overexpression of ArcZ showed a dramatic reduction in  
820 CyaR bound to Hfq and upregulation of CyaR targets, such as *nadE* (Papenfort et al., 2009),  
821 suggesting that this activity is conserved between these two Gram-negative bacteria. A similar  
822 type of asymmetric regulation has also been elegantly demonstrated for the Qrr3 sRNA of  
823 *Vibrio cholera* (Feng et al., 2015). The fate of these sRNA-sRNA duplexes may depend on the  
824 position of the interaction; It was shown that if sRNA-target RNA base-pair within a stabilizing  
825 5' stem, the sRNA will be preferentially degraded (Feng et al., 2015). Consistent with this,  
826 folding of the chimeric reads suggests that ArcZ preferentially base-pairs with CyaR at the 5'  
827 end (Figure 4), which may alter secondary structures that normally help to stabilize the sRNA.

828 The biological role of ArcZ targeting CyaR is unclear, however, a possible function could be  
829 to reduce noise in CyaR expression by preventing CyaR levels from overshooting during the  
830 transition phase.

831 ArcZ and CyaR target mRNAs are associated with many different processes. Thus,  
832 these interactions are expected to connect multiple pathways. For example, ArcZ regulation  
833 of CyaR may connect adaptation to stationary phase/biofilm development (De Lay and  
834 Gottesman, 2009; Monteiro et al., 2012) to quorum sensing and cellular adherence (De Lay  
835 and Gottesman, 2009). CyaR expression is controlled by the global regulator Crp. Most of the  
836 genes controlled by Crp are involved in transport and/or catabolism of amino acids or sugar.  
837 Interestingly, ArcZ downregulates the *sdaCB* dicistron which encodes for proteins involved in  
838 serine uptake and metabolism (Papenfort et al., 2009). This operon has been shown to be  
839 regulated by Crp as well, suggesting that ArcZ can counteract the activity of Crp.

840

## 841 **Materials and Methods**

842

### 843 **Bacterial strains and culture conditions**

844 An overview of the bacterial strains used in this study is provided in Supplementary  
845 Table 5. The *E. coli* MG1655, TOP10 or TOP10F' strains served as parental strains. The *E.*  
846 *coli* K12 strain used for CLASH experiments, MG1655 *hfq::HTF* was previously reported (Tree  
847 et al., 2014). Cells were grown in Lysogeny Broth (LB) or minimal medium with supplements  
848 (1xM9 salts, 2 mM MgSO<sub>4</sub>, 0.1 mM CaCl<sub>2</sub>, 0.03 mM thiamine, 0.2% carbon-source) at 37°C  
849 under aerobic conditions with shaking at 200 rpm. The media were supplemented with  
850 antibiotics where required at the following concentrations: ampicillin (Sigma, UK, A9518) - 100  
851 µg/ml, chloramphenicol (Corning, US, C239RI) - 25 µg/ml, kanamycin (Gibco, US, 11815-024)  
852 - 50 µg/ml. Where indicated, 0.2% glucose or maltose were used. For induction of sRNA  
853 expression from plasmids, 1 mM IPTG, 200 nM anhydrotetracycline hydrochloride (Sigma,  
854 1035708-25MG) or 0.2% L-arabinose (Sigma, A3256) were used.

855

### 856 **Construction of sRNA expression plasmids**

857 For the pulse-overexpression constructs, the sRNA gene of interest was cloned at the  
858 transcriptional +1 site under *Para* control by amplifying the pBAD+1 plasmid (Supplementary  
859 Table 5) by inverse PCR using Q5 DNA Polymerase (NEB). The pBAD+1 template is derived  
860 from pBAD*mycHisA* (Tree et al., 2014). The sRNA genes and seed mutants (SM) were  
861 synthesized as ultramers (IDT; Supplementary Table 5), which served as the forward primers,  
862 as described (Tree et al., 2014). The reverse primer (oligo pBAD+1\_5P\_rev) bears a  
863 monophosphorylated 5'-end to allow blunt-end self-ligation. The PCR reaction was digested  
864 with 10U DpnI (NEB) for 1h at 37°C and purified by ethanol precipitation. The sRNA-pBAD

865 linear PCR product was circularized by self-ligation, performed as above. Ligations were  
866 transformed in DH5 $\alpha$  competent cells. Positive transformants were screened by sequencing.  
867 The control plasmid pBAD+1 was constructed similarly by self-ligation of the PCR product  
868 generated from oligonucleotides pBAD+1\_XbaI\_fwd and pBAD+1\_5P\_rev. Small RNA  
869 overexpression constructs derived from the pZA21MCS and pZE12*luc* (Expressys) were  
870 generated identically, using the indicated ultramers in Supplementary Table 5 as forward  
871 primers, and oligos pZA21MCS\_5P\_rev and pZE12\_5P\_rev as reverse primers, respectively,  
872 and transformed in *E. coli* TOP10F'.

873

#### 874 **Construction of mRNA-superfolder GFP fusions**

875 Supplementary Table 5 lists all the plasmids, gene fragments and primers used for  
876 cloning procedures in this work. To construct constitutively expressed, in-frame mRNA-*sfGFP*  
877 fusions for the fluorescence reporter studies, the 5'UTR, start codon and first ~5 codons of  
878 target genes were cloned under the control of PLtetO-1 promoter in a pXG10-SF backbone  
879 as previously described (Corcoran et al., 2012; Urban and Vogel, 2007). Derivatives of the  
880 target-GFP fusion plasmids harbouring seed mutations (SM) were generated using synthetic  
881 mutated gene-fragments (IDT, Belgium, Supplementary Table 5). To prepare the inserts, the  
882 target region of mRNA of interest was either amplified by PCR from *E. coli* genomic DNA or  
883 synthesized as g-blocks (IDT, Belgium) and cloned using NheI and NsiI restriction sites.  
884 Transformants were screened by restriction digest analysis and verified by Sanger sequencing  
885 (Edinburgh Genomics, Edinburgh, UK).

886

#### 887 **Hfq UV Cross-linking, Ligation and Analysis of Hybrids (Hfq-CLASH)**

888 CLASH was performed essentially as described (Waters et al., 2016), with a number  
889 of modifications including changes in incubation steps, cDNA library preparation, reaction  
890 volumes and UV cross-linking. *E. coli* expressing the chromosomal Hfq-HTF were grown  
891 overnight in LB at 37°C with shaking (200 rpm), diluted to starter OD<sub>600</sub> 0.05 in fresh LB, and  
892 re-grown with shaking at 37°C in 750 ml LB. A volume of culture equivalent to 80 OD<sub>600</sub> per  
893 ml was removed at the following cell-densities (OD<sub>600</sub>): 0.4, 0.8, 1.2, 1.8, 2.4, 3.0 and 4.0, and  
894 immediately subjected to UV (254 nm) irradiation for 22 seconds (~500 mJ/cm<sup>2</sup>) in the Vari-  
895 X-linker (van Nues et al., 2017) (<https://www.vari-x-link.com>). Cells were harvested using a  
896 rapid filtration device (van Nues et al., 2017) (<https://www.vari-x-link.com>) onto 0.45  $\mu$ M  
897 nitrocellulose filters (Sigma, UK, HAWP14250) and flash-frozen on the membrane in liquid  
898 nitrogen. Membranes were washed with ~15 ml ice-cold phosphate-buffered saline (PBS),  
899 and cells were harvested by centrifugation. Cell pellets were lysed by bead-beating in 1  
900 volume per weight TN150 buffer (50mM Tris pH 8.0, 150 mM NaCl, 0.1% NP-40, 5 mM  $\beta$ -  
901 mercaptoethanol) in the presence of protease inhibitors (Roche, A32965), and 3 volumes 0.1



902 mm Zirconia beads (Thistle Scientific, 11079101z), by performing 5 cycles of 1 minute  
903 vortexing followed by 1-minute incubation on ice. One additional volume of TN150 buffer was  
904 added. To reduce the viscosity of the lysate and remove contaminating DNA the lysate was  
905 incubated with RQ1 DNase I (10U/ml Promega, M6101) for 30 minutes on ice. Two-additional  
906 volumes of TN150 were added and mixed with the lysates by vortexing. The lysates were  
907 centrifuged for 20 minutes at 4000 rpm at 4°C and subsequently clarified by a second  
908 centrifugation step at 13.4 krpm, for 20 min at 4°C. Purification of the UV cross-linked Hfq-  
909 HTF-RNA complexes and cDNA library preparation was performed as described (Granneman  
910 et al., 2009). Cell lysates were incubated with 50 µl of pre-equilibrated M2 anti-FLAG beads  
911 (Sigma, M8823-5ML) for 1-2 hours at 4°C. The anti-FLAG beads were washed three times 10  
912 minutes with 2 ml TN1000 (50 mM Tris pH 7.5, 0.1% NP-40, 1M NaCl) and three times 10  
913 minutes with TN150 without protease inhibitors (50 mM Tris pH 7.5, 0.1% NP-40, 150mM  
914 NaCl). For TEV cleavage, the beads were resuspended in 250 µl of TN150 buffer (without  
915 protease inhibitors) and incubated with home-made GST-TEV protease at room temperature  
916 for 1.5 hours. The TEV eluates were then incubated with a fresh 1:100 dilution preparation of  
917 RNacelt (RNase A and T1 mixture; Agilent, 400720) for exactly 5 minutes at 37°C, after which  
918 they were mixed with 0.4g GuHCl (6M, Sigma, G3272-100G), NaCl (300mM), and Imidazole  
919 (10mM, I202-25G). Note this needs to be carefully optimized to obtain high-quality cDNA  
920 libraries. The samples were then transferred to 50 µl Nickel-NTA agarose beads (Qiagen,  
921 30210), equilibrated with wash buffer 1 (6 M GuHCl, 0.1% NP-40, 300 mM NaCl, 50 mM Tris  
922 pH 7.8, 10 mM Imidazole, 5 mM beta-mercaptoethanol). Binding was performed at 4°C  
923 overnight with rotation. The following day, the beads were transferred to Pierce SnapCap spin  
924 columns (Thermo Fisher, 69725), washed 3 times with wash buffer 1 and 3 times with 1xPNK  
925 buffer (10 mM MgCl<sub>2</sub>, 50mM Tris pH 7.8, 0.1% NP-40, 5 mM beta-mercaptoethanol). The  
926 washes were followed by on-column TSAP incubation (Thermosensitive alkaline  
927 phosphatase, Promega, M9910) treatment for 1h at 37°C with 8 U of phosphatase in 60 µl of  
928 1xPNK, in the presence of 80U RNasin (Promega, N2115). The beads were washed once  
929 with 500 µl wash buffer 1 and three times with 500 µl 1xPNK buffer. To add 3'-linkers (App-  
930 PE – Supplementary Table 5), the Nickel-NTA beads were incubated in 80 µl 3'-linker ligation  
931 mix with (1 X PNK buffer, 1 µM 3'-adapter, 10% PEG8000, 30U Truncated T4 RNA ligase 2  
932 K227Q (NEB, M0351L), 60U RNasin). The samples were incubated for 4 hours at 25°C. The  
933 5'-ends of bound RNAs were radiolabelled with 30U T4 PNK (NEB, M0201L) and 3µl <sup>32</sup>P-  
934 γATP (1.1µCi; Perkin Elmer, NEG502Z-500) in 1xPNK buffer for 40 min at 37°C, after which  
935 ATP (Roche, 11140965001) was added to a final concentration of 1mM, and the incubation  
936 prolonged for another 20 min to complete 5'-end phosphorylation. The resin was washed three  
937 times with 500 µl wash buffer 1 and three times with equal volume of 1xPNK buffer. For on-

938 bead 5'-linker ligation, the beads were incubated 16h at 16°C in 1xPNK buffer with 40U T4  
939 RNA ligase I (NEB, M0204L), and 1 µl 100 µM L5 adapter (Supplementary Table 5), in the  
940 presence of 1mM ATP and 60U RNasin. The Nickel-NTA beads were washed three times with  
941 wash buffer 1 and three times with buffer 2 (50 mM Tris-HCl pH 7.8, 50 mM NaCl, 10 mM  
942 imidazole, 0.1% NP-40, 5 mM β-mercaptoethanol). The protein-RNA complexes were eluted  
943 in two steps in new tubes with 200 µl of elution buffer (wash buffer 2 with 250 mM imidazole).  
944 The protein-RNA complexes were precipitated on ice by adding TCA (T0699-100ML) to a final  
945 concentration of 20%, followed by a 20-minute centrifugation at 4°C at 13.4 krpm. Pellets were  
946 washed with 800 µl acetone, and air dried for a few minutes in the hood. The protein pellet  
947 was resuspended and incubated at 65°C in 20 µl 1x NuPage loading buffer (Thermo Scientific,  
948 NP0007), resolved on 4–12% NuPAGE gels (Thermo Scientific, NP0323PK2) and visualised  
949 by autoradiography. The cross-linked proteins-RNA were cut directly from the gel and  
950 incubated with 160 µg of Proteinase K (Roche, 3115801001) in 600 µl wash buffer 2  
951 supplemented with 1% SDS and 5 mM EDTA at 55°C for 2-3 hours with mixing. The RNA was  
952 subsequently extracted by phenol-chloroform extraction and ethanol precipitated. The RNA  
953 pellet was directly resuspended in RT buffer and was transcribed in a single reaction with the  
954 SuperScript IV system (Invitrogen, 18090010) according to manufacturer's instructions using  
955 the PE\_reverse oligo as primer. The cDNA was purified with the DNA Clean and Concentrator  
956 5 kit (Zymo Research) and eluted in 11 µl DEPC water. Half of the cDNA (5 µl) was amplified  
957 by PCR using Pfu Polymerase (Promega, M7745) with the cycling conditions (95°C for 2 min;  
958 20-24 cycles: 95°C for 20s, 52°C for 30s and 72°C for 1 min; final extension of 72°C for 5 min).  
959 The PCR primers are listed in Supplementary Table 5. PCR products were treated with 40U  
960 Exonuclease 1 (NEB, M0293L) for 1 h at 37°C to remove free oligonucleotide and purified by  
961 ethanol precipitation/ or the DNA Clean and Concentrator 5 kit (Zymo Research, D4003T).  
962 Libraries were resolved on a 2% MetaPhor agarose (Lonza, LZ50181) gel and 175-300bp  
963 fragments were gel-extracted with the MinElute kit (Qiagen, 28004) according to  
964 manufacturer's instructions. All libraries were quantified on a 2100 Bionalyzer using the High-  
965 Sensitivity DNA assay and a Qubit 4 (Thermo Scientific, Q33226). Individual libraries were  
966 pooled based on concentration and barcode sequence identity. Paired-end sequencing (75  
967 bp) was performed by Edinburgh Genomics on an Illumina HiSeq 4000 platform.

968

## 969 **RNA-seq**

970 *E. coli* MG1655 was cultured, UV-irradiated and harvested as described for the CLASH  
971 procedure. Total RNA was extracted using the Guanidium thiocyanate phenol method. RNA  
972 integrity was assessed with the Prokaryote Total RNA Nano assay on a 2100 Bioanalyzer  
973 (Agilent, G2939BA). Sequencing libraries from two biological replicates were prepared by

974 NovoGene using the TruSeq library preparation protocol and 150bp paired-end sequencing  
975 was performed on an Illumina NovaSeq 6000 system. This yielded ~7-8 million paired-end  
976 reads per sample. For the overexpression analysis of MdoR, we generated RNA-seq libraries  
977 using an in-house protocol. Genomic DNA was removed by incubating 10 µg of total RNA with  
978 2U Turbo DNase (Thermo Scientific, AM2238) in a 50 µl final volume for 30 minutes at 37°C  
979 in the presence of 10 U SuperaseIn RNase Inhibitor (Thermo Scientific, AM2694). RNA was  
980 subsequently phenol-chloroform extracted and purified by ethanol-precipitation. Ribosomal  
981 RNA was removed with the Ribo-Zero rRNA Removal Kit (Gram-Negative Bacteria; Illumina,  
982 MRZGN126) according to the manufacturer's instructions. Successful rRNA depletion was  
983 verified on the Agilent 2100 Bioanalyzer. The RNA was fragmented for 5 min at 95°C in the  
984 presence of Superscript III buffer (Invitrogen) followed by a five-minute incubation on ice.  
985 Reverse-transcription (RT) was performed with Superscript III (Thermo Scientific, 18080044)  
986 in 20 µl reactions according to manufacturer's procedures using 250 ng of ribosomal RNA  
987 depleted RNA and 2.5 µM random hexamers (PE\_solexa\_hexamer, oligo 73, Supplementary  
988 Table 5). The RNA and free primers were degraded using 20U of Exonuclease I (NEB,  
989 M0293L) and 50U RNaseI (NEB, M0243S) and the cDNA was purified with the DNA Clean &  
990 Concentrator 5 kit (Zymo Research). Ligation of the 5' adapter (P5\_phospho\_adapter, oligo  
991 39) to the cDNA was performed using CircLigase II (Lucigen, CL9021K) for 6 hours at 60°C,  
992 followed by a 10-minute inactivation at 80°C. The cDNA was purified with the DNA Clean &  
993 Concentrator 5 kit. Half of the cDNA library was PCR amplified using Pfu polymerase  
994 (Promega, M7745) using the P5 forward PCR oligonucleotide and barcoded BC reverse  
995 oligonucleotides (200 nM; Supplementary Table 5; 95°C for 2 min, 95°C for 20s, 52°C for 30s  
996 and 72°C for 1 min, and a final extension of 72°C for 5 min. 20 cycles of amplification). The  
997 PCR products were treated with Exonuclease 1 (NEB, M0293L) for 1 h at 37°C and purified  
998 by ethanol precipitation. Libraries were resolved on a 2% MetaPhor agarose gel 200-500 bp  
999 fragments were gel-extracted using the MinElute kit. All libraries were quantified on a 2100  
1000 Bionalyzer using the High-Sensitivity DNA assay (Agilent, 5067-4627). Individual libraries  
1001 were pooled in equimolar amounts. Paired-end sequencing (75 bp) was performed by  
1002 Edinburgh Genomics on the Illumina HiSeq 4000 platform.

1003

#### 1004 **Small RNA overexpression studies**

1005 Individual TOP10F' clones carrying pZA21 and pZE12-derived sRNA constructs and  
1006 control plasmids combinations (Supplementary Table 5) were cultured to OD<sub>600</sub> 0.1 and  
1007 expression of sRNAs was induced with IPTG and anhydrotetracycline hydrochloride (Sigma,  
1008 I6758-1G and 1035708-25MG) for one hour. Cells were collected by centrifugation for 30  
1009 seconds at 14000 rpm, flash-frozen in liquid nitrogen and total RNA was isolated as above.



1010 Genomic DNA was digested with Turbo DNase (Thermo Scientific, AM2238) , then the RNA  
1011 was purified with RNAClean XP beads (Beckman Coulter, A63987). Gene expression was  
1012 quantified by RT-qPCR (see below) using 10 ng total RNA as template, and expressed as fold  
1013 change relative to the reference sample containing pJV300 (Sittka et al., 2007) or pZA21.

1014 For pulse-overexpression studies overnight MG1655 cultures containing pBAD::sRNA  
1015 and empty pBAD+1 control plasmids were inoculated in fresh LB-ampicillin medium at a  
1016 starting OD<sub>600</sub> of 0.05 and grown aerobically at 37°C to OD<sub>600</sub> 0.4. Pre-induction (0 min) and  
1017 post-induction samples were harvested. For induction, cultures were supplemented with L-  
1018 arabinose (Sigma, A3256) and rapidly collected by filtration and flash-frozen in liquid nitrogen  
1019 at the indicated time-points. RNA was extracted from three biological replicate time-series,  
1020 followed by RNA-seq library preparation, next generation sequencing and DESeq2 analysis  
1021 of differentially expressed genes.

1022

### 1023 **GFP reporter system to quantify sRNA effect on target expression**

1024 A two-plasmid system was used to express each sRNA, and mRNA-*sfGFP* fusions  
1025 (Corcoran et al., 2012; Urban and Vogel, 2007) with modifications. The sRNA and *sfGFP*-  
1026 fusion plasmids were co-transformed in *E. coli* TOP10 cells by electroporation and cells were  
1027 maintained on dual selection with ampicillin and chloramphenicol. In TOP10 cells, the mRNA-  
1028 *sfGFP* constructs are constitutively expressed, whereas sRNA expression requires L-  
1029 arabinose induction. The expression of *sfGFP*-fused targets in the presence or absence of  
1030 sRNAs was quantified at the protein level, by plate reader experiments and at the RNA level,  
1031 by RT-qPCR.

1032 For the plate reader experiments, a single colony of bacterial strain harbouring a  
1033 sRNA-target-*sfGFP* combination was inoculated in a 96-well Flat Bottom Transparent  
1034 Polystyrene plate with lid (Thermo Scientific, 152038) and cultured overnight at 37°C in 100  
1035 µl LB supplemented with antibiotics and L-arabinose (Sigma, A3256) to induce expression of  
1036 sRNAs. Next day, each overnight inoculum was diluted 1:100 by serial dilution, in triplicate, in  
1037 LB with freshly prepared L-arabinose to a final volume of 100 µl. Cultures were grown in a 96-  
1038 well plate in an Infinite 200 Pro plate reader (Tecan) controlled by i-control software (Tecan)  
1039 for 192 cycles at 37°C with 1 min orbital shaking (4 mm amplitude) every 5th minute. To  
1040 monitor optical density over time, the following parameters were used: wavelength 600 nm,  
1041 bandwidth 9 nm. Fluorescence was monitored with excitation wavelength 480 nm, bandwidth  
1042 9 nm and emission wavelength 520 nm, bandwidth 20 nm. Measurements were recorded at  
1043 5-minute intervals, by top reading. Raw data was processed following guidance from previous  
1044 reports (Urban and Vogel, 2007). First, the range of linearity of increase of fluorescence with  
1045 OD<sub>600</sub> was identified for all individual triplicates. Only the linearity range common to all

1046 triplicates was considered for further analysis. For each set of triplicates, the mean  
1047 fluorescence was calculated at each OD<sub>600</sub>. To correct for background and cell  
1048 autofluorescence, the mean fluorescence of a strain with plasmid pXG-0 was subtracted from  
1049 all strains with GFP plasmids at the equivalent OD<sub>600</sub>. Ultimately, a curve was generated for  
1050 each sample, plotting the background-corrected fluorescence (GFP) versus OD<sub>600</sub>. The  
1051 experiments were performed for three biological replicates, and mean values and standard  
1052 error of the means calculated for each strain.

1053

#### 1054 **RT-qPCR**

1055 Total RNA (12.5µg) was treated with 2U of Turbo DNase (Thermo Scientific, AM2238)  
1056 for 1 hour at 37°C in a 10 µl reaction in the presence of 2U SuperaseIn RNase inhibitor  
1057 (Thermo Scientific, AM2694). The DNase was inactivated by 10 minutes incubation at 75°C.  
1058 Reverse transcription (RT) was performed in a single reaction for all target genes of interest  
1059 using a mix of gene-specific RT primers at 3.5 µM concentration each. After addition of 2.5 µl  
1060 RT primer mix, the RNA and primers were denatured at 70°C for 3 min, then snap chilled and  
1061 incubated on ice for 5 min. RT was performed for 1 hour at 55°C with SuperScript III (Thermo  
1062 Scientific, 18080051) using 5 µl of RNA-RT primers mix in 10 µl final volume (100 U  
1063 Superscript III, 2.5 mM DTT, 1xFS Buffer, 0.75 mM dNTPs) in the presence of 1U RNasin  
1064 (Promega, N2115). RT was followed by treatment with 5U RNase H for 30 min at 37°C to  
1065 remove the RNA from the RNA-cDNA duplexes. The cDNA was diluted 10-fold with DEPC  
1066 water. Quantitative PCR was performed on 50ng of DNase I-treated total RNA using the  
1067 Brilliant III UltraFast SYBR Green QPCR Master Mix (Agilent, #600883) and the Luna  
1068 Universal One-Step RT-qPCR Kit (NEB, E3005E) according to manufacturer's instructions.  
1069 The qPCRs were run on a LightCycler 480 (Roche), and the specificity of the product was  
1070 assessed by generating melting curves, as follows: 65°C-60s, 95°C (0.11 ramp rate with 5  
1071 acquisitions per °C, continuous). The data analyses were performed with the IDEAS2.0  
1072 software, at default settings: Absolute Quantification/Fit Points for Cp determination and Melt  
1073 Curve Genotyping.

1074 The qPCR efficiency of primer pairs was assessed by performing standard curves by serial  
1075 dilution of template RNA or genomic DNA. Negative controls such as -RT or no template  
1076 control were used throughout, and the qPCR for all samples was performed in technical  
1077 triplicate. Outliers from the samples with technical triplicate standard deviations of Cp > 0.3  
1078 were discarded from the analyses. To calculate the fold-change relative to the control, the 2<sup>-  
1079 ddCp</sup> method was employed, using *recA* or 5S rRNA (*rrfD*) as the reference genes where  
1080 indicated. Experiments were performed for minimum two biological replicates, and the mean  
1081 fold-change and standard error of the mean were computed. Unless otherwise stated,

1082 significance of the fold-change difference compared to the reference sample control (for which  
1083 fold-change =1) was tested with a one-sample t-test.

1084

### 1085 **Northern Blot analysis**

1086 Total RNA was extracted from cell lysates by GTC-Phenol extraction. For large RNA  
1087 fragments, 10 µg of total RNA was resolved on a 1.25% BPTE- gel (pH 7) and transferred to  
1088 a nylon membrane (HyBond N+, GEHealthcare, RPN1210B) by capillarity. For short RNA  
1089 fragments, 10 µg total RNA was separated on an 8% polyacrylamide TBE-Urea gel and  
1090 transferred to a nitrocellulose membrane by electroblotting for four hours at 50 V. Membranes  
1091 were pre-hybridised in 10 ml of UltraHyb Oligo Hyb (Thermo Scientific, AM8663) for one hour  
1092 and probed with <sup>32</sup>P-labeled DNA oligo at 42°C for 12-18 hours in a hybridization oven. The  
1093 sequences of the probes used for Northern blot detection are detailed in Supplementary Table  
1094 5. Membranes were washed twice with 2xSSC + 0.5% SDS solution for 10 minutes and  
1095 visualized using a Phosphor imaging screen and FujiFilm FLA-5100 Scanner (IP-S mode).  
1096 For detection of highly abundant species (5S rRNA) autoradiography was used for exposure.

1097

### 1098 **Western blot analyses**

1099 A fraction of the *E. coli* MG1655 Hfq::*htf* lysates used for the RNA-seq experiments  
1100 using strains cultured, cross-linked, harvested and lysed in identical conditions as the CLASH  
1101 experiments containing 40 µg protein was run on PAGE gels and transferred to a nitrocellulose  
1102 membrane. The membranes were blocked for one hour in blocking solution (5% non- fat milk  
1103 in PBST (1X phosphate saline buffer, 0.1% Tween-20). To detect Hfq-HTF protein, the  
1104 membrane was probed overnight at 4°C with the Rabbit anti-TAP polyclonal primary antibody  
1105 (Thermo Fisher, 1:5000 dilution in blocking solution), which recognizes an epitope at the  
1106 region between the TEV-cleavage site and His6. For the loading control we used a rabbit  
1107 polyclonal to GroEL primary antibody (Abcam, 1:150000 dilution, ab82592), for 2 hours at  
1108 room temperature. After 3x10 min PBST washes, the membranes were blotted for one hour  
1109 with a Goat anti-rabbit IgG H&L (IRDye 800) secondary antibody (Abcam, ab216773, 1:10000  
1110 in blocking solution) at room temperature. Finally, after three 10-minute PBST washes, the  
1111 blot was rinsed in PBS, and the proteins were visualised with a LI-COR (Odyssey CLx) using  
1112 the 800 nm channel and scan intensity 4. Image acquisition and quantifications were  
1113 performed with the Image Studio Software.

1114

### 1115 **Primer extension analysis**

1116 One microgram total RNA was reverse-transcribed using SuperScript III reverse  
1117 transcriptase (Thermo Scientific, 18080051) using <sup>32</sup>P-radiolabelled oligonucleotides as

1118 primers (Supplementary Table 5). Primers were added to the RNA and annealing was  
1119 performed by heating the samples at 85°C for three minutes and then snap chilling them on  
1120 ice. The RT was performed for one hour at 45°C, followed by Exonuclease I and RNaseH  
1121 (NEB M0293L and M0243S) (0.5 µl each) treatment for 30 minutes at 37°C. Reactions were  
1122 stopped by mixing with an equal volume of 2XRNA loading dye (NEB, B0363S), 2 minutes  
1123 incubation at 95°C and snap chilled. The sequencing ladders were prepared with Sequenase  
1124 v2.0 (Thermo Scientific, 70775Y200UN) according to specified instructions. Samples were  
1125 resolved on 6% PAA/8M TBE-urea gels and visualized using the FujiFilm FLA5100 scanner.

1126

### 1127 **Construction of the MdoR seed-mutant strain**

1128 To mutate the chromosomal copy of MdoR, we used the λRed system (Datsenko and  
1129 Wanner, 2000). We amplified the integration cassette from plasmid pKD4 with ultramers 895  
1130 and 896, containing homology regions to the coding sequence of *malG*, the desired MdoR  
1131 sequence and to the region immediately downstream of the Rho-independent terminator,  
1132 respectively. With this design, the scar after removal of the *Kan<sup>r</sup>* cassette was expected at a  
1133 site outside the MdoR/*malG* sequence. The PCR product was electroporated in *E. coli*  
1134 MG1566 strains carrying the pKD46 plasmid from which λRed recombinase was induced with  
1135 10 mM L-arabinose. Correct replacement of the MdoR seed sequence was screened by  
1136 colony PCR using primer pairs: 725 & 909 and 726 & 910 (Supplementary Table 5). The  
1137 antibiotic resistance cassette was removed from substitution mutants by FLP-recombinase  
1138 expressed constitutively from pE-FLP (St-Pierre et al., 2013). Successful allele replacement  
1139 was confirmed by Sanger sequencing.

1140

### 1141 **Polysome profiling analyses**

1142 Wild-type *E. coli* MG1655 containing empty pBAD plasmid and an isogenic strain  
1143 containing pBAD::MdoR were grown in LB until OD<sub>600</sub> 0.4, then treated for 15 minutes with L-  
1144 arabinose (Sigma, A3256) to induce overexpression of MdoR, and cycloheximide (Sigma,  
1145 C4859-1ML) at a final concentration of 100 µg/ml for 3 minutes. 200 ml of cells were harvested  
1146 by rapid filtration and flash frozen. The cells were washed in ice-cold PBS supplemented with  
1147 100µg/ml cycloheximide.

1148 Polysomal profiling was performed according to previously described protocols  
1149 (Bernabò et al., 2017; Lunelli et al., 2016) with minor changes in the lysis buffer (10 mM NaCl,  
1150 10 mM MgCl<sub>2</sub>, 10 mM Tris-HCl (pH 7.5), 100 µg/ml cycloheximide, 1% (w/v) Na-Deoxycholate,  
1151 1U RQ DNase I (Promega, M6101), 0.6U/mL RiboLock (Thermo Scientific, EO0381) in DEPC  
1152 water). Lysates were kept on ice for 30 min, centrifuged 3X at 15000 g for 10 min. The  
1153 supernatants were loaded on a linear 10%–30% [w/v] sucrose gradient and centrifuged for 4

1154 hours using a SW41 rotor at 40000 rpm in a Beckman Optima XPN-100 Ultracentrifuge.  
1155 Fractions of 1 mL in volume were collected monitoring the absorbance at 254 nm with the UA-  
1156 6 UV/VIS detector (Teledyne Isco). Fractions from the entire gradient (total RNA) and from the  
1157 fractions corresponding to ribosomes (70S) and polysomes (polysomal RNA) were pooled  
1158 and RNA was purified by acid phenol–chloroform extraction according to (Tebaldi et al., 2012).

1159

#### 1160 **Terminator™ 5'-PhosphateDependent Exonuclease treatment**

1161 Ten micrograms of total RNA extracted from cell-samples at OD<sub>600</sub> 1.2 and 1.8 were  
1162 treated with 5'-Terminator Dependent Exonuclease (Lucigen, TER51020) as per manufacturer  
1163 instructions using Buffer A. The reaction was terminated by phenol extraction and ethanol  
1164 precipitation, and the RNA was loaded on 8% polyacrylamide-urea gels and transferred to  
1165 nylon membranes that were probed for MdoR, CpxQ, RybB and 5S rRNA (Supplementary  
1166 Table 5).

1167

#### 1168 **Seed mutant studies**

1169 Wild-type MG1655 and seed mutant strains were grown overnight in minimal medium  
1170 with glucose. Next day, each starter culture was split and inoculated at OD<sub>600</sub> 0.05 in fresh M9  
1171 medium with glucose or maltose as the sole carbon source. Growth was monitored and cells  
1172 were harvested at OD<sub>600</sub> 0.5. Total RNA was extracted, and gene expression was quantified  
1173 by RT-qPCR or Northern Blot.

1174

#### 1175 **Computational analysis**

1176 *Pre-processing of the raw sequencing data.*

1177 Raw sequencing reads in fastq files were processed using a pipeline developed by  
1178 Sander Granneman, which uses tools from the pyCRAC package (Webb et al., 2014). The  
1179 entire pipeline is available at <https://bitbucket.org/sgrann/>. The CRAC\_pipeline\_PE.py  
1180 pipeline first demultiplexes the data using pyBarcodeFilter.py and the in-read barcode  
1181 sequences found in the L5 5' adapters. Flexbar then trims the reads to remove 3'-adapter  
1182 sequences and poor-quality nucleotides (Phred score <23). Using the random nucleotide  
1183 information present in the L5 5'-adaptor sequences, the reads are then collapsed to remove  
1184 potential PCR duplicates. The reads were then mapped to the *E. coli* MG1655 genome using  
1185 Novoalign ([www.novocraft.com](http://www.novocraft.com)). To determine to which genes the reads mapped to, we  
1186 generated an annotation file in the Gene Transfer Format (GTF). This file contains the start  
1187 and end positions of each gene on the chromosome as well as what genomic features (i.e.  
1188 sRNA, protein- coding, tRNA) it belongs to. To generate this file, we used the Rockhopper  
1189 software (Tjaden, 2015) on *E. coli* rRNA-depleted total RNA-seq data (generated by Christel  
1190 Sirocchi), a minimal GTF file obtained from ENSEMBL (without UTR information). The



1191 resulting GTF file contained information not only on the coding sequences, but also complete  
1192 5' and 3' UTR coordinates. We then used pyReadCounters.py with Novoalign output files as  
1193 input and the GTF annotation file to count the total number of unique cDNAs that mapped to  
1194 each gene.

1195

1196 *Normalization steps.*

1197 To normalise the read count data generated with pyReadCounters.py and to correct  
1198 for differences in library depth between time-points, we calculated Transcripts Per Million  
1199 reads (TPM) for each gene. Briefly, for each time-point the raw counts for each gene was first  
1200 divided by the gene length and then divided by the sum of all the values for the genes in that  
1201 time-point to normalize for differences in library depth. The TPM values for each OD<sub>600</sub> studied  
1202 were divided by the TPM values of the first sample (OD<sub>600</sub> 0.4) and were then log<sub>2</sub>-normalized.  
1203 The log<sub>2</sub>-normalized fold-changes were used to compare RNA-seq and Hfq-cross-linking  
1204 profiles among samples, and to perform k-means clustering with the python sklearn.  
1205 cluster.KMeans class.

1206

1207 *Hfq-binding coverage plots.*

1208 For the analysis of the Hfq binding sites the pyCRAC package (Webb et al., 2014) was  
1209 used (versions. 1.3.2-1.4.4). The pyBinCollector tool was used to generate Hfq cross-linking  
1210 distribution plots over genomic features. First, PyCalculateFDRs.py was used to identify the  
1211 significantly enriched Hfq-binding peaks (minimum 10 reads, minimum 20 nucleotide  
1212 intervals). Next, pyBinCollector was used to normalize gene lengths by dividing their  
1213 sequences into 100 bins and calculate nucleotide densities for each bin. To generate the  
1214 distribution profile for all genes individually, we normalized the total number of read clusters  
1215 (assemblies of overlapping cDNA sequences) covering each nucleotide position by the total  
1216 number of clusters that cover the gene. Motif searches were performed with pyMotif.py using  
1217 the significantly enriched Hfq-binding peaks (FDR intervals). The 4-8 nucleotide k-mers with  
1218 Z-scores above the indicated threshold were used for making the motif logo with the k-mer  
1219 probability logo tool (Wu and Bartel, 2017) with the -ranked option (<http://kplogo.wi.mit.edu/>).

1220

1221 *Analysis of chimeric reads.*

1222 Chimeric reads were identified using the hyb package using default settings (Travis et  
1223 al., 2013) and further analysed using the pyCRAC package (Webb et al., 2014). To apply this  
1224 single-end specific pipeline to our paired-end sequencing data, we joined forward and reverse  
1225 reads using FLASH (Magoč and Salzberg, 2011), which merges overlapping paired reads into  
1226 a single read. These, as well as any remaining single reads, were then analysed using hyb.  
1227 The -anti option for the hyb pipeline was used to be able to use a genomic *E. coli* hyb database,

1228 rather than a transcript database. Uniquely annotated hybrids (.ua.hyb) were used in  
1229 subsequent analyses. To visualise the hybrids in the genome browser, the .ua.hyb output files  
1230 were converted to the GTF format. To generate distribution plots for the genes to which the  
1231 chimeric reads mapped, the parts of the chimeras were clustered with pyClusterReads.py and  
1232 BEDtools (Quinlan and Hall, 2010) (intersectBed) was used to remove clusters that map to  
1233 multiple regions. To produce the coverage plots with pyBinCollector, each cluster was counted  
1234 only once, and the number of reads belonging to each cluster was ignored.

1235

1236 *sRNA density plots.*

1237 To visualize the nucleotide read density of sRNA-target pairs for a given sRNA, we  
1238 first merged the hyb datasets for all OD<sub>600</sub> and biological replicates and filtered the interactions  
1239 that were found statistically significant in the unified dataset. For each sRNA-target pair in the  
1240 filtered dataset, the hit counts at each nucleotide position for all chimeras were summed. The  
1241 count data was log<sub>2</sub>-normalised (actually log<sub>2</sub>(Chimera count +1) to avoid NaN for nucleotide  
1242 positions with 0 hits when log-transforming the data).

1243

1244 *sRNA-sRNA network visualization.*

1245 Only the sRNA-sRNA chimeric reads representing statistically significant interactions  
1246 in the merged CLASH dataset were considered. For each such interaction, chimera counts  
1247 corresponding in either orientation were summed, log<sub>2</sub>-transformed and visualized with the  
1248 igraph Python package.

1249

1250 *Differential expression analyses.*

1251 For the differential expression analyses DESeq2 was used (Love et al., 2014). Three  
1252 MdoR pulse-overexpression datasets were compared to three pBAD Control overexpression  
1253 datasets. Only differentially expressed genes that had an adjusted p-value of 0.05 or lower  
1254 were considered significant.

1255

1256 *Multiple sequence alignments and conservation analyses.*

1257 The homologous sequences of MdoR in other enterobacteria were retrieved by  
1258 BLAST. JalView was used for the multiple sequence alignments, using the MAFFT algorithm  
1259 (Waterhouse et al., 2009).

1260

1261 **Data and Code availability.**

1262 The next generation sequencing data have been deposited on the NCBI Gene  
1263 Expression Omnibus (GEO) with accession number GSE123050. The python pyCRAC(Webb  
1264 et al., 2014), kinetic-CRAC and GenomeBrowser software packages used for analysing the

1265 data are available from <https://bitbucket.org/sgrann> (pyCRAC up to version 1.3.3),  
1266 <https://git.ecdf.ed.ac.uk/sgrannem/> and pypi ([https://pypi.org/user/g\\_ronimo/](https://pypi.org/user/g_ronimo/)). The hyb  
1267 pipeline for identifying chimeric reads is available from <https://github.com/gkudla/hyb>. The  
1268 FLASH algorithm for merging paired reads is available from  
1269 <https://github.com/dstreett/FLASH2>. Bedgraph and Gene Transfer Format (GTF) generated  
1270 from the analysis of the Hfq CLASH, RNA-seq and TEX RNA-seq data(Thomason et al., 2015)  
1271 are available from the Granneman lab DataShare repository  
1272 (<https://datashare.is.ed.ac.uk/handle/10283/2915>).

1273

## 1274 **Acknowledgement**

1275 We are grateful to Lionello Bossi and Meriem El Karoui for their valuable feedback on  
1276 the project and fruitful discussions. We thank Christel Sirocchi for help with preparing *E. coli*  
1277 RNA-seq libraries, Erica de Leau for expert technical assistance and the members of the  
1278 Granneman lab for critically reading the manuscript. We thank Jean-Marie Pages and Julia  
1279 Vergalli for help the analyses of LamB levels and for fruitful discussions. This work was  
1280 supported by grants from the Wellcome Trust (091549 to S.G and 102334 to I.A.I.), the  
1281 Wellcome Trust Centre for Cell Biology core grant (092076), a Medical Research Council non  
1282 Clinical Senior Research Fellowship (MR/R008205/1 to S.G.), the Australian National Health  
1283 and Medical Research Council Project grants (GNT1067241 and GNT1139313 to J.J.T) and  
1284 the Autonomous Province of Trento (Axonomix to G.V and M.M.). Sequencing of Hfq CLASH  
1285 data was carried out by Edinburgh Genomics that is partly supported through core grants from  
1286 NERC (R8/H10/56), MRC (MR/K001744/1) and BBSRC (BB/J004243/1).

1287

## 1288 **Competing interest.**

1289 The authors declare no competing financial interest.

1290

## 1291 **Materials & Correspondence**

1292 All requests for code, materials and reagents should be sent to Sander Granneman

1293 ([sgrannem@ed.ac.uk](mailto:sgrannem@ed.ac.uk))

1294

## 1295 **References**

1296 Alba BM, Gross CA. 2004. Regulation of the Escherichia coli  $\sigma^E$ -dependent envelope  
1297 stress response. *Mol Microbiol* **52**:613–619. doi:10.1111/j.1365-2958.2003.03982.x  
1298 Baev M V., Baev D, Jansco Radek A, Campbell JW. 2006a. Growth of Escherichia coli

- 1299 MG1655 on LB medium: Monitoring utilization of amino acids, peptides, and  
1300 nucleotides with transcriptional microarrays. *Appl Microbiol Biotechnol* **71**:317–322.  
1301 doi:10.1007/s00253-005-0310-5
- 1302 Baev M V., Baev D, Radek AJ, Campbell JW. 2006b. Growth of Escherichia coli MG1655 on  
1303 LB medium: Determining metabolic strategy with transcriptional microarrays. *Appl*  
1304 *Microbiol Biotechnol* **71**:323–328. doi:10.1007/s00253-006-0392-8
- 1305 Balleza E, López-Bojorquez LN, Martínez-Antonio A, Resendis-Antonio O, Lozada-Chávez I,  
1306 Balderas-Martínez YI, Encarnación S, Collado-Vides J. 2009. Regulation by  
1307 transcription factors in bacteria: Beyond description. *FEMS Microbiol Rev* **33**:133–151.  
1308 doi:10.1111/j.1574-6976.2008.00145.x
- 1309 Bandyra KJ, Said N, Pfeiffer V, Górna MW, Vogel J, Luisi BF. 2012. The Seed Region of a  
1310 Small RNA Drives the Controlled Destruction of the Target mRNA by the  
1311 Endoribonuclease RNase E. *Mol Cell* **47**:943–953. doi:10.1016/j.molcel.2012.07.015
- 1312 Beisel CL, Storz G. 2011. The Base-Pairing RNA Spot 42 Participates in a Multioutput  
1313 Feedforward Loop to Help Enact Catabolite Repression in Escherichia coli. *Mol Cell*  
1314 **41**:286–297. doi:10.1016/j.molcel.2010.12.027
- 1315 Bernabò P, Tebaldi T, Groen EJN, Lane FM, Perenthaler E, Mattedi F, Newbery HJ, Zhou H,  
1316 Zuccotti P, Potrich V, Shorrock HK, Muntoni F, Quattrone A, Gillingwater TH, Viero G.  
1317 2017. In Vivo Translatome Profiling in Spinal Muscular Atrophy Reveals a Role for SMN  
1318 Protein in Ribosome Biology. *Cell Rep*. doi:10.1016/j.celrep.2017.10.010
- 1319 Boos W, Shuman H. 1998. Maltose / Maltodextrin System of Escherichia coli : Transport ,  
1320 Metabolism , and Regulation Maltose / Maltodextrin System of Escherichia coli :  
1321 Transport , Metabolism , and Regulation. *Microbiol Mol Biol Rev* **62**:204–229.
- 1322 Bossi L, Figueroa-Bossi N. 2007. A small RNA downregulates LamB maltoporin in  
1323 Salmonella. *Mol Microbiol* **65**:799–810. doi:10.1111/j.1365-2958.2007.05829.x
- 1324 Bossi L, Maloriol D, Figueroa-Bossi N. 2008. Porin biogenesis activates the  $\sigma$ E response in  
1325 Salmonella hfq mutants. *Biochimie* **90**:1539–1544. doi:10.1016/j.biochi.2008.06.001
- 1326 Bouvier M, Sharma CM, Mika F, Nierhaus KH, Vogel J. 2008. Small RNA binding to 5'  
1327 mRNA coding region inhibits translational initiation. *Mol Cell* **32**:827–837.
- 1328 Bruce HA, Du D, Matak-Vinkovic D, Bandyra KJ, Broadhurst RW, Martin E, Sobott F,  
1329 Shkumatov A V., Luisi BF. 2018. Analysis of the natively unstructured RNA/protein-  
1330 recognition core in the Escherichia coli RNA degradosome and its interactions with  
1331 regulatory RNA/Hfq complexes. *Nucleic Acids Res*. doi:10.1093/nar/gkx1083
- 1332 Chao Y, Li L, Girodat D, Forstner KU, Said N, Corcoran C, Smiga M, Papenfort K, Reinhardt  
1333 R, Wieden HJ, Luisi BF, Vogel J. 2017. *in vivo* cleavage map illuminates the central  
1334 role of RNase E in coding and non-coding RNA pathways. *Mol Cell* **65**:39–51.  
1335 doi:10.1016/j.molcel.2016.11.002
- 1336 Chao Y, Papenfort K, Reinhardt R, Sharma CM, Vogel J. 2012. An atlas of Hfq-bound  
1337 transcripts reveals 3' UTRs as a genomic reservoir of regulatory small RNAs. *EMBO J*  
1338 **31**:4005–4019.
- 1339 Chao Y, Vogel J. 2016. A 3' UTR-Derived Small RNA Provides the Regulatory Noncoding  
1340 Arm of the Inner Membrane Stress Response. *Mol Cell* **61**:352–363.  
1341 doi:10.1016/j.molcel.2015.12.023
- 1342 Chen S, Zhang A, Blyn LB, Storz G. 2004. MicC, a second small-RNA regulator of omp  
1343 protein expression in Escherichia coli. *J Bacteriol*. doi:10.1128/JB.186.20.6689-  
1344 6697.2004
- 1345 Corcoran CP, Podkaminski D, Papenfort K, Urban JH, Hinton JCD, Vogel J. 2012.  
1346 Superfolder GFP reporters validate diverse new mRNA targets of the classic porin  
1347 regulator, MicF RNA. *Mol Microbiol* **84**:428–445.
- 1348 Datsenko KA, Wanner BL. 2000. One-step inactivation of chromosomal genes in  
1349 Escherichia coli K-12 using PCR products. *Proc Natl Acad Sci U S A* **97**:6640–5.  
1350 doi:10.1073/pnas.120163297
- 1351 Davis BM, Waldor MK. 2007. RNase E-dependent processing stabilizes MicX, a Vibrio  
1352 cholerae sRNA. *Mol Microbiol*. doi:10.1111/j.1365-2958.2007.05796.x
- 1353 De Las Peñas A, Connolly L, Gross CA. 1997. The sigmaE-mediated response to

- 1354 extracytoplasmic stress in *Escherichia coli* is transduced by RseA and RseB, two  
1355 negative regulators of sigmaE. *Mol Microbiol* **24**:373–385. doi:9159523
- 1356 De Lay N, Gottesman S. 2009. The crp-activated small noncoding regulatory RNA CyaR  
1357 (RyeE) links nutritional status to group behavior. *J Bacteriol.* doi:10.1128/JB.01157-08
- 1358 Feng L, Rutherford ST, Papenfort K, Bagert JD, Van Kessel JC, Tirrell DA, Wingreen NS,  
1359 Bassler BL. 2015. A Qrr noncoding RNA deploys four different regulatory mechanisms  
1360 to optimize quorum-sensing dynamics. *Cell.* doi:10.1016/j.cell.2014.11.051
- 1361 Gogol EB, Rhodius VA, Papenfort K, Vogel J, Gross CA. 2011. Small RNAs endow a  
1362 transcriptional activator with essential repressor functions for single-tier control of a  
1363 global stress regulon. *Proc Natl Acad Sci U S A* **108**:12875–12880.
- 1364 Granneman S, Kudla G, Petfalski E, Tollervey D. 2009. Identification of protein binding sites  
1365 on U3 snoRNA and pre-rRNA by UV cross-linking and high-throughput analysis of  
1366 cDNAs. *Proc Natl Acad Sci U S A* **106**:9613–9618. doi:10.1073/pnas.0901997106
- 1367 Guo MS, Updegrave TB, Gogol EB, Shabalina SA, Gross CA, Storz G. 2014. MicL, a new  
1368 sigmaE-dependent sRNA, combats envelope stress by repressing synthesis of Lpp, the  
1369 major outer membrane lipoprotein. *Genes Dev* **28**:1620–1634.  
1370 doi:10.1101/gad.243485.114
- 1371 Han K, Tjaden B, Lory S. 2016. GRIL-seq provides a method for identifying direct targets of  
1372 bacterial small regulatory RNA by in vivo proximity ligation. *Nat Microbiol* **2**:16239.
- 1373 Helwak A, Kudla G, Dudnakova T, Tollervey D. 2013. Mapping the human miRNA  
1374 interactome by CLASH reveals frequent noncanonical binding. *Cell* **153**:654–665.  
1375 doi:10.1016/j.cell.2013.03.043
- 1376 Holmqvist E, Vogel J. 2018. RNA-binding proteins in bacteria. *Nat Rev Microbiol.*  
1377 doi:10.1038/s41579-018-0049-5
- 1378 Holmqvist E, Wagner EGH. 2017. Impact of bacterial sRNAs in stress responses. *Biochem*  
1379 *Soc Trans.* doi:10.1042/BST20160363
- 1380 Holmqvist E, Wright PR, Li L, Bischler T, Barquist L, Reinhardt R, Backofen R, Vogel J.  
1381 2016. Global RNA recognition patterns of post-transcriptional regulators Hfq and CsrA  
1382 revealed by UV crosslinking in vivo. *EMBO J* **35**:e201593360–1011.
- 1383 Hör J, Gorski SA, Vogel J. 2018. Bacterial RNA Biology on a Genome Scale. *Mol Cell* **785**–  
1384 **799**. doi:10.1016/j.molcel.2017.12.023
- 1385 Hör J, Vogel J. 2017. Global snapshots of bacterial RNA networks. *EMBO J* **36**:245–247.  
1386 doi:10.15252/embj.201696072
- 1387 Johansen J, Rasmussen AA, Overgaard M, Valentin-Hansen P. 2006. Conserved small non-  
1388 coding RNAs that belong to the sigmaE regulon: role in down-regulation of outer  
1389 membrane proteins. *J Mol Biol* **364**:1–8.
- 1390 Kenyon WJ, Thomas SM, Johnson E, Pallen MJ, Spector MP. 2005. Shifts from glucose to  
1391 certain secondary carbon-sources result in activation of the extracytoplasmic function  
1392 sigma factor sigmaE in *Salmonella enterica* serovar Typhimurium. *Microbiology*  
1393 **151**:2373–2383. doi:10.1099/mic.0.27649-0
- 1394 Khemici V, Carpousis AJ. 2004. The RNA degradosome and poly(A) polymerase of  
1395 *Escherichia coli* are required in vivo for the degradation of small mRNA decay  
1396 intermediates containing REP-stabilizers. *Mol Microbiol.* doi:10.1046/j.1365-  
1397 2958.2003.03862.x
- 1398 Kortmann J, Narberhaus F. 2012. Bacterial RNA thermometers: molecular zippers and  
1399 switches. *Nat Rev Microbiol* **10**:255–265.
- 1400 Kudla G, Granneman S, Hahn D, Beggs JD, Tollervey D. 2011. Cross-linking, ligation, and  
1401 sequencing of hybrids reveals RNA-RNA interactions in yeast. *Proc Natl Acad Sci U S*  
1402 *A* **108**:10010–10015. doi:10.1073/pnas.1017386108
- 1403 Lalaouna D, Carrier M-C, Semsey S, Brouard J-S, Wang J, Wade JT, Massé E. 2015. A 3'  
1404 External Transcribed Spacer in a tRNA Transcript Acts as a Sponge for Small RNAs to  
1405 Prevent Transcriptional Noise. *Mol Cell* **58**:393–405.
- 1406 Lorenz R, Bernhart SH, Höner Zu Siederdisen C, Tafer H, Flamm C, Stadler PF, Hofacker  
1407 IL. 2011. ViennaRNA Package 2.0. *Algorithms Mol Biol* **6**:26. doi:10.1186/1748-7188-6-  
1408 26



- 1409 Love MI, Huber W, Anders S. 2014. Moderated estimation of fold change and dispersion for  
1410 RNA-seq data with DESeq2. *Genome Biol* **15**:550.
- 1411 Lunelli L, Bernabò P, Bolner A, Vaghi V, Marchioretto M, Viero G. 2016. Peering at Brain  
1412 Polysomes with Atomic Force Microscopy. *J Vis Exp*. doi:10.3791/53851
- 1413 Mäder U, Nicolas P, Depke M, Pané-Farré J, Debarbouille M, van der Kooi-Pol MM, Guérin  
1414 C, Dérozier S, Hiron A, Jarmer H, Leduc A, Michalik S, Reilman E, Schaffer M, Schmidt  
1415 F, Bessières P, Noirot P, Hecker M, Msadek T, Völker U, van Dijl JM. 2016.  
1416 *Staphylococcus aureus* Transcriptome Architecture: From Laboratory to Infection-  
1417 Mimicking Conditions. *PLoS Genet* **12**:e1005962.
- 1418 Magoč T, Salzberg SL. 2011. FLASH: Fast length adjustment of short reads to improve  
1419 genome assemblies. *Bioinformatics*. doi:10.1093/bioinformatics/btr507
- 1420 Martínez-Antonio A, Janga SC, Thieffry D. 2008. Functional organisation of *Escherichia coli*  
1421 transcriptional regulatory network. *J Mol Biol* **381**:238–247.  
1422 doi:10.1016/j.jmb.2008.05.054
- 1423 Melamed S, Faigenbaum-Romm R, Peer A, Reiss N, Shechter O, Bar A, Altuvia Y, Argaman  
1424 L, Margalit H. 2018. Mapping the small RNA interactome in bacteria using RIL-seq. *Nat*  
1425 *Protoc* **13**:1–33.
- 1426 Melamed S, Peer A, Faigenbaum-Romm R, Gatt YEE, Reiss N, Bar A, Altuvia YYY,  
1427 Argaman L, Margalit H. 2016. Global Mapping of Small RNA-Target Interactions in  
1428 Bacteria. *Mol Cell* **63**:884–897. doi:10.1016/j.molcel.2016.07.026
- 1429 Miyakoshi M, Chao Y, Vogel J. 2015a. Regulatory small RNAs from the 3' regions of  
1430 bacterial mRNAs. *Curr Opin Microbiol*. doi:10.1016/j.mib.2015.01.013
- 1431 Miyakoshi M, Chao Y, Vogel J. 2015b. Cross talk between ABC transporter mRNAs via a  
1432 target mRNA-derived sponge of the GcvB small RNA. *EMBO J* **34**:e201490546--1492.  
1433 doi:10.15252/embj.201490546
- 1434 Monteiro C, Papenfort K, Hentrich K, Ahmad I, Le Guyon S, Reimann R, Grantcharova N,  
1435 Römling U. 2012. Hfq and Hfq-dependent small RNAs are major contributors to  
1436 multicellular development in *Salmonella enterica* serovar typhimurium. *RNA Biol*.  
1437 doi:10.4161/rna.19682
- 1438 Moon K, Gottesman S. 2011. Competition among Hfq-binding small RNAs in *Escherichia*  
1439 *coli*. *Mol Microbiol* **82**:1545–1562. doi:10.1111/j.1365-2958.2011.07907.x
- 1440 Morita T, Maki K, Aiba H. 2005. RNase E-based ribonucleoprotein complexes: Mechanical  
1441 basis of mRNA destabilization mediated by bacterial noncoding RNAs. *Genes Dev*.  
1442 doi:10.1101/gad.1330405
- 1443 Mouali Y El, Gaviria-Cantin T, Sá Nchez-Romero MA, Gibert M, Westermann AJ, Rg Vogel  
1444 J, Balsalobre C. 2018. CRP-cAMP mediates silencing of *Salmonella* virulence at the  
1445 post-transcriptional level 1–26. doi:10.1371/journal.pgen.1007401
- 1446 Navarro Llorens JM, Tormo A, Martínez-García E. 2010. Stationary phase in gram-negative  
1447 bacteria. *FEMS Microbiol Rev* **34**:476–495. doi:10.1111/j.1574-6976.2010.00213.x
- 1448 Newbury SF, Smith NH, Higgins CF. 1987. Differential mRNA stability controls relative gene  
1449 expression within a polycistronic operon. *Cell* **51**:1131–1143. doi:10.1016/0092-  
1450 8674(87)90599-X
- 1451 Nitzan M, Rehani R, Margalit H. 2017. Integration of Bacterial Small RNAs in Regulatory  
1452 Networks. *Annu Rev Biophys* **46**:131–148. doi:10.1146/annurev-biophys-070816-  
1453 034058
- 1454 Nues R van, Schweikert G, Leau E de, Selega A, Langford A, Franklin R, Iosub I,  
1455 Wadsworth P, Sanguinetti G, Granneman S, Van Nues R, Schweikert G, De Leau E,  
1456 Selega A, Langford A, Franklin R, Iosub I, Wadsworth P, Sanguinetti G, Granneman S,  
1457 Nues R van, Schweikert G, Leau E de, Selega A, Langford A, Franklin R, Iosub I,  
1458 Wadsworth P, Sanguinetti G, Granneman S, Van Nues R, Schweikert G, De Leau E,  
1459 Selega A, Langford A, Franklin R, Iosub I, Wadsworth P, Sanguinetti G, Granneman S.  
1460 2017. Kinetic CRAC uncovers a role for Nab3 in determining gene expression profiles  
1461 during stress. *Nat Commun* **8**:12. doi:10.1038/s41467-017-00025-5
- 1462 Papenfort K, Pfeiffer V, Lucchini S, Sonawane A, Hinton JCD, Vogel J. 2008. Systematic  
1463 deletion of *Salmonella* small RNA genes identifies CyaR, a conserved CRP-dependent

- 1464 riboregulator of OmpX synthesis. *Mol Microbiol*. doi:10.1111/j.1365-2958.2008.06189.x  
1465 Papenfort K, Pfeiffer V, Mika F, Lucchini S, Hinton JCD, Vogel J. 2006.  $\sigma$ E-dependent small  
1466 RNAs of Salmonella respond to membrane stress by accelerating global omp mRNA  
1467 decay. *Mol Microbiol* **62**:1674–1688.  
1468 Papenfort K, Said N, Welsink T, Lucchini S, Hinton JCDD, Vogel J. 2009. Specific and  
1469 pleiotropic patterns of mRNA regulation by ArcZ, a conserved, Hfq-dependent small  
1470 RNA. *Mol Microbiol* **74**:139–158. doi:10.1111/j.1365-2958.2009.06857.x  
1471 Pletnev P, Osterman I, Sergiev P, Bogdanov A, Dontsova O. 2015. Survival guide:  
1472 Escherichia coli in the stationary phase. *Acta Naturae* **7**:22–33.  
1473 Quinlan AR, Hall IM. 2010. BEDTools: a flexible suite of utilities for comparing genomic  
1474 features. *Bioinformatics* **26**:841–842.  
1475 Rhodius VA, Suh WC, Nonaka G, West J, Gross CA. 2006. Conserved and variable  
1476 functions of the  $\sigma$ E stress response in related genomes. *PLoS Biol* **4**:0043–0059.  
1477 doi:10.1371/journal.pbio.0040002  
1478 Sætrom P, Sneve R, Kristiansen KI, Snøve O, Grünfeld T, Rognes T, Seeberg E. 2005.  
1479 Predicting non-coding RNA genes in Escherichia coli with boosted genetic  
1480 programming. *Nucleic Acids Res*. doi:10.1093/nar/gki644  
1481 Sedlyarova N, Shamovsky I, Bharati BK, Epshtein V, Chen J, Gottesman S, Schroeder R,  
1482 Nudler E. 2016. sRNA-Mediated Control of Transcription Termination in E. coli. *Cell*  
1483 **167**:111–121.e13.  
1484 Sezonov G, Joseleau-Petit D, D’Ari R. 2007. Escherichia coli physiology in Luria-Bertani  
1485 broth. *J Bacteriol* **189**:8746–8749. doi:10.1128/JB.01368-07  
1486 Sharma E, Sterne-Weiler T, O’Hanlon D, Blencowe BJ. 2016. Global Mapping of Human  
1487 RNA-RNA Interactions. *Mol Cell* **62**:618–626. doi:10.1016/j.molcel.2016.04.030  
1488 Shimoni Y, Friedlander G, Hetzroni G, Niv G, Altuvia S, Biham O, Margalit H. 2007.  
1489 Regulation of gene expression by small non-coding RNAs: a quantitative view. *Mol Syst*  
1490 *Biol* **3**:138.  
1491 Sittka A, Pfeiffer V, Tedin K, Vogel J. 2007. The RNA chaperone Hfq is essential for the  
1492 virulence of Salmonella typhimurium. *Mol Microbiol*. doi:10.1111/j.1365-  
1493 2958.2006.05489.x  
1494 Smirnov A, Förstner KU, Holmqvist E, Otto A, Günster R, Becher D, Reinhardt R, Vogel J.  
1495 2016. Grad-seq guides the discovery of ProQ as a major small RNA-binding protein.  
1496 *Proc Natl Acad Sci* **113**:11591–11596. doi:10.1073/pnas.1609981113  
1497 Smirnov A, Wang C, Drewry LL, Vogel J. 2017. Molecular mechanism of mRNA repression  
1498 in *trans* by a ProQ-dependent small RNA. *EMBO J* **36**:1029–1045.  
1499 doi:10.15252/embj.201696127  
1500 St-Pierre F, Cui L, Priest DG, Endy D, Dodd IB, Shearwin KE. 2013. One-step cloning and  
1501 chromosomal integration of DNA. *ACS Synth Biol*. doi:10.1021/sb400021j  
1502 Storz G, Vogel J, Wassarman KM. 2011. Regulation by Small RNAs in Bacteria: Expanding  
1503 Frontiers. *Mol Cell* **43**:880–891. doi:10.1016/j.molcel.2011.08.022  
1504 Tebaldi T, Re A, Viero G, Pegoretti I, Passerini A, Blanzieri E, Quattrone A. 2012.  
1505 Widespread uncoupling between transcriptome and translome variations after a  
1506 stimulus in mammalian cells. *BMC Genomics*. doi:10.1186/1471-2164-13-220  
1507 Thomason MK, Bischler T, Eisenbart SK, Förstner KU, Zhang A, Herbig A, Nieselt K,  
1508 Sharma CM, Storza G. 2015. Global transcriptional start site mapping using differential  
1509 RNA sequencing reveals novel antisense RNAs in Escherichia coli. *J Bacteriol*.  
1510 doi:10.1128/JB.02096-14  
1511 Thompson KM, Rhodius VA, Gottesman S. 2007. SigmaE regulates and is regulated by a  
1512 small RNA in Escherichia coli. *J Bacteriol* **189**:4243–4256.  
1513 Tjaden B. 2015. De novo assembly of bacterial transcriptomes from RNA-seq data. *Genome*  
1514 *Biol* **16**:1–10. doi:10.1186/s13059-014-0572-2  
1515 Travis AJ, Moody J, Helwak A, Tollervey D, Kudla G. 2013. Hyb: A bioinformatics pipeline  
1516 for the analysis of CLASH (crosslinking, ligation and sequencing of hybrids) data.  
1517 *Methods*.  
1518 Tree Jai J., Granneman S, McAteer SP, Tollervey D, Gally DL. 2014. Identification of

- 1519 bacteriophage-encoded anti-sRNAs in pathogenic *Escherichia coli*. *Mol Cell* **55**:199–  
1520 213. doi:10.1016/j.molcel.2014.05.006
- 1521 Tree J J, Granneman S, McAteer SP, Tollervey D, Gally DL. 2014. Identification of  
1522 bacteriophage-encoded anti-sRNAs in pathogenic *Escherichia coli*.  
1523 doi:10.1016/j.molcel.2014.05.006
- 1524 Udekwu KI, Wagner EGH. 2007. Sigma E controls biogenesis of the antisense RNA MicA.  
1525 *Nucleic Acids Res*. doi:10.1093/nar/gkl1154
- 1526 Updegrove TB, Zhang A, Storz G. 2016. Hfq: The flexible RNA matchmaker. *Curr Opin*  
1527 *Microbiol* **30**:133–138. doi:10.1016/j.mib.2016.02.003
- 1528 Urban JH, Vogel J. 2007. Translational control and target recognition by *Escherichia coli*  
1529 small RNAs in vivo. *Nucleic Acids Res* **35**:1018–1037. doi:10.1093/nar/gkl1040
- 1530 Vogel J, Luisi BF. 2011. Hfq and its constellation of RNA. *Nat Rev Microbiol* **9**:578–589.
- 1531 Wassarman KM, Repoila F, Rosenow C, Storz G, Gottesman S. 2001. Identification of novel  
1532 small RNAs using comparative genomics and microarrays. *Genes Dev*.  
1533 doi:10.1101/gad.901001
- 1534 Waterhouse AM, Procter JB, Martin DMA, Clamp M, Barton GJ. 2009. Jalview Version 2-A  
1535 multiple sequence alignment editor and analysis workbench. *Bioinformatics* **25**:1189–  
1536 1191. doi:10.1093/bioinformatics/btp033
- 1537 Waters LS, Storz G. 2009. Regulatory RNAs in Bacteria. *Cell* **136**:615–628.  
1538 doi:10.1016/j.cell.2009.01.043
- 1539 Waters SA, McAteer SP, Kudla G, Pang I, Deshpande NP, Amos TG, Leong KW, Wilkins  
1540 MR, Strugnell R, Gally DL, Tollervey D, Tree JJ. 2016. Small RNA interactome of  
1541 pathogenic *E. coli* revealed through crosslinking of RNase E. *EMBO J* **36**:e201694639.  
1542 doi:10.15252/embj.201694639
- 1543 Webb S, Hector RD, Kudla G, Granneman S. 2014. PAR-CLIP data indicate that Nrd1-  
1544 Nab3-dependent transcription termination regulates expression of hundreds of protein  
1545 coding genes in yeast. *Genome Biol* **15**:R8. doi:10.1186/gb-2014-15-1-r8
- 1546 Wilson KS, Hippel PH Von. 1995. Transcription termination at intrinsic terminators: The role  
1547 of the RNA hairpin (*Escherichia coli*/RNA polymerase/rho-independent termination).  
1548 *Biochemistry* **92**:8793–8797. doi:10.1073/pnas.92.19.8793
- 1549 Wright PR, Georg J, Mann M, Sorescu DA, Richter AS, Lott S, Kleinkauf R, Hess WR,  
1550 Backofen R. 2014. CopraRNA and IntaRNA: Predicting small RNA targets, networks  
1551 and interaction domains. *Nucleic Acids Res* **42**:119–123. doi:10.1093/nar/gku359
- 1552 Wright PR, Richter AS, Papenfort K, Mann M, Vogel J, Hess WR, Backofen R, Georg J.  
1553 2013. Comparative genomics boosts target prediction for bacterial small RNAs. *Proc*  
1554 *Natl Acad Sci* **110**:E3487–E3496. doi:10.1073/pnas.1303248110
- 1555 Wu X, Bartel DP. 2017. KpLogo: Positional k -mer analysis reveals hidden specificity in  
1556 biological sequences. *Nucleic Acids Res*. doi:10.1093/nar/gkx323  
1557  
1558  
1559

## Supplementary Figures and legends

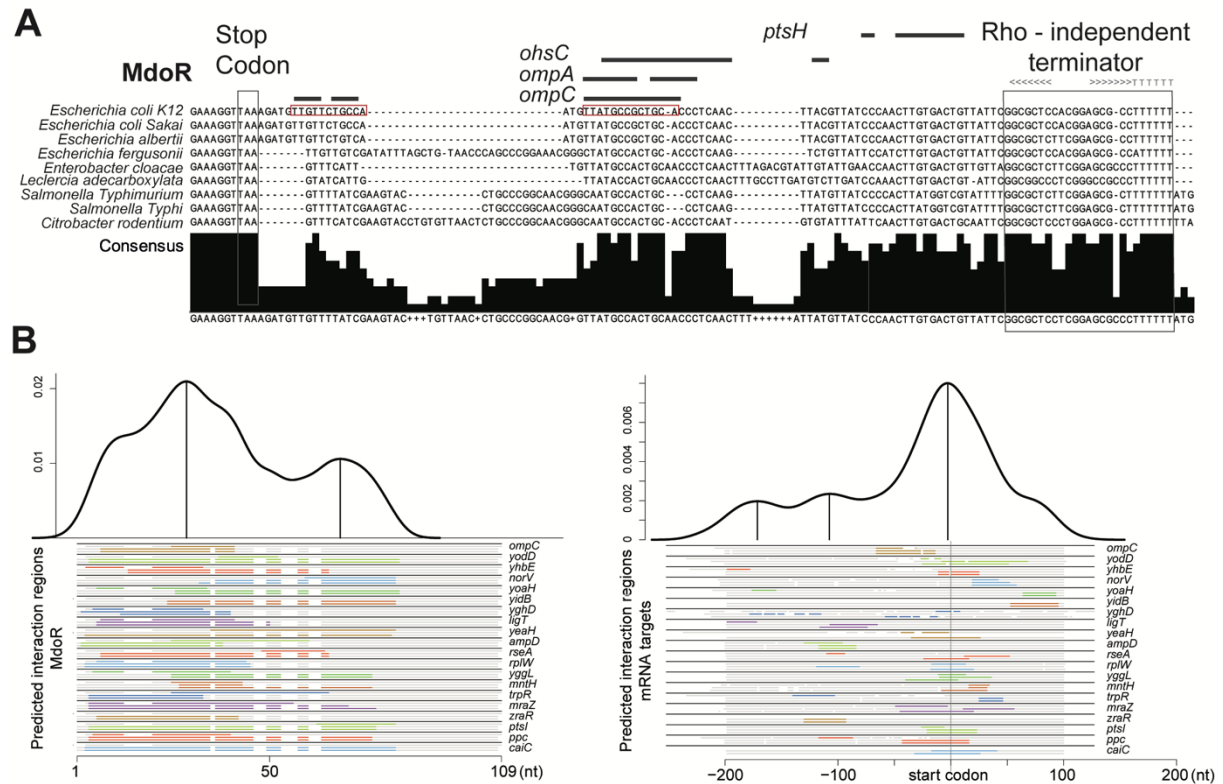

**Figure 1—figure supplement 1. Hfq expression and Hfq binding to RNAs at different cell densities in UV-irradiated *E. coli*.**

(A) Western blot analyses of Hfq levels during various growth stages. Hfq-HTF was detected using an anti-TAP primary antibody, and a fluorescent secondary antibody. GroEL was used as a loading control.

(B) Quantification of Hfq levels from the Western blot result. The fluorescent signal for Hfq-HTF and GroEL was measured with the LI-COR from biological replicate experiments. The levels of Hfq were normalised to GroEL and expressed as fold-change relative to OD<sub>600</sub> 0.4.

(C) Hfq crosslinking to RNA is similar at each optical density. Autoradiogram showing the purified radioactively labelled Hfq-RNA complexes for each OD<sub>600</sub> after elution from the nickel beads. Source data for (A-C) are provided as a Source Data file.



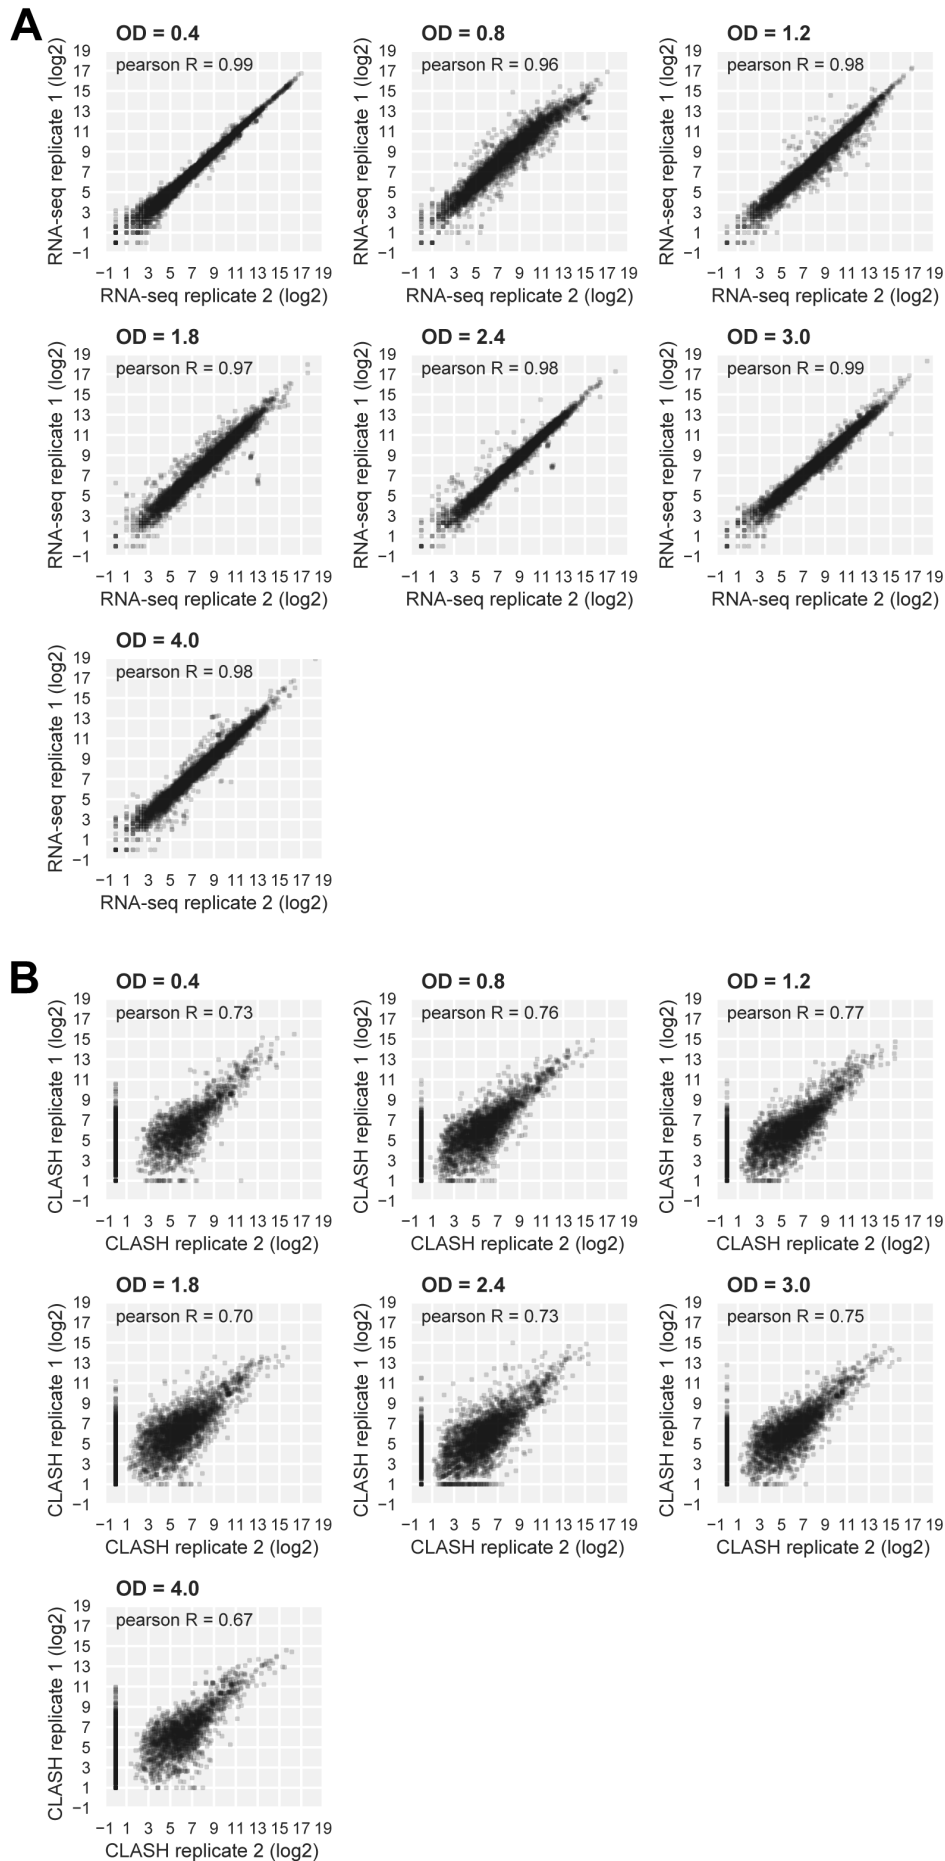



**Figure 1–figure supplement 2. RNAseq and Hfq CLASH replicate datasets are highly correlated.**

(A, B) Scatter plots showing the distribution of log<sub>2</sub> Transcripts Per Million (TPM) normalised read counts for Hfq CLASH (A) and RNA-seq (B) biological replicates. Pearson R coefficients describing the correlation between the two independent experiments at each OD<sub>600</sub> are included.

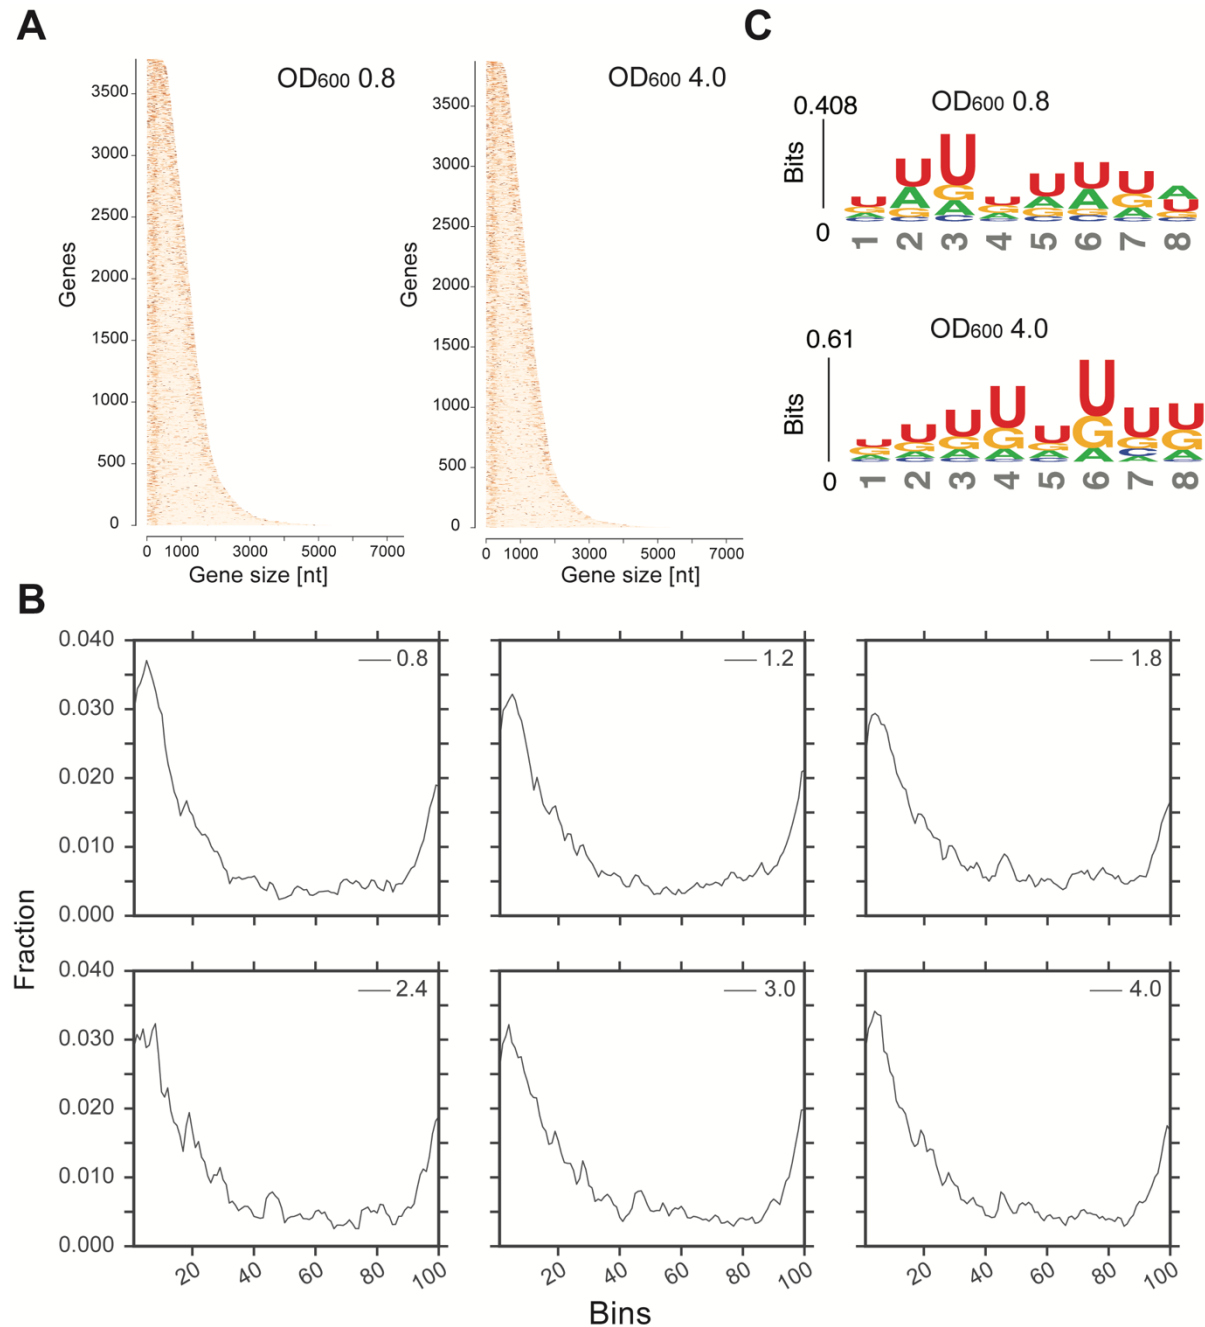

**Figure 1–figure supplement 3. Transcriptome-wide maps of Hfq binding to mRNA genes.**

(A) Heatmaps showing the distribution of Hfq binding sites across all mRNA genes at OD<sub>600</sub> 0.8 and 4.0. The genes are sorted by their sequence length (x-axis); the darker a nucleotide is, the more Hfq is crosslinked to it. To generate the heatmap, Hfq binding clusters were generated. A 5'- and 3'UTR length of 200bp was used.

(B) Hfq binds to poly-U tracks. Significant k-mers (4-8 nt in length) were identified using the pyMotif tool of the pyCRAC package (Webb et al., 2014) and the motif logo was generated using all k-mers with a Z-score > 3, with kpLogo (Wu and Bartel, 2017). (C) A more stringent selection of the genes used to generate the distribution of Hfq binding to the transcriptome: all genes with overlapping 5' or 3'UTRs were removed from the analysis to avoid 'duplicate' counting. For all remaining cDNAs, FDR intervals of minimum 20 nt were considered for distribution plotting. The interval length (with UTR flanks as in the GTF annotation file) for each gene was normalized over 100 bins (x-axis), and the fraction of hits in each bin was calculated (y-axis).

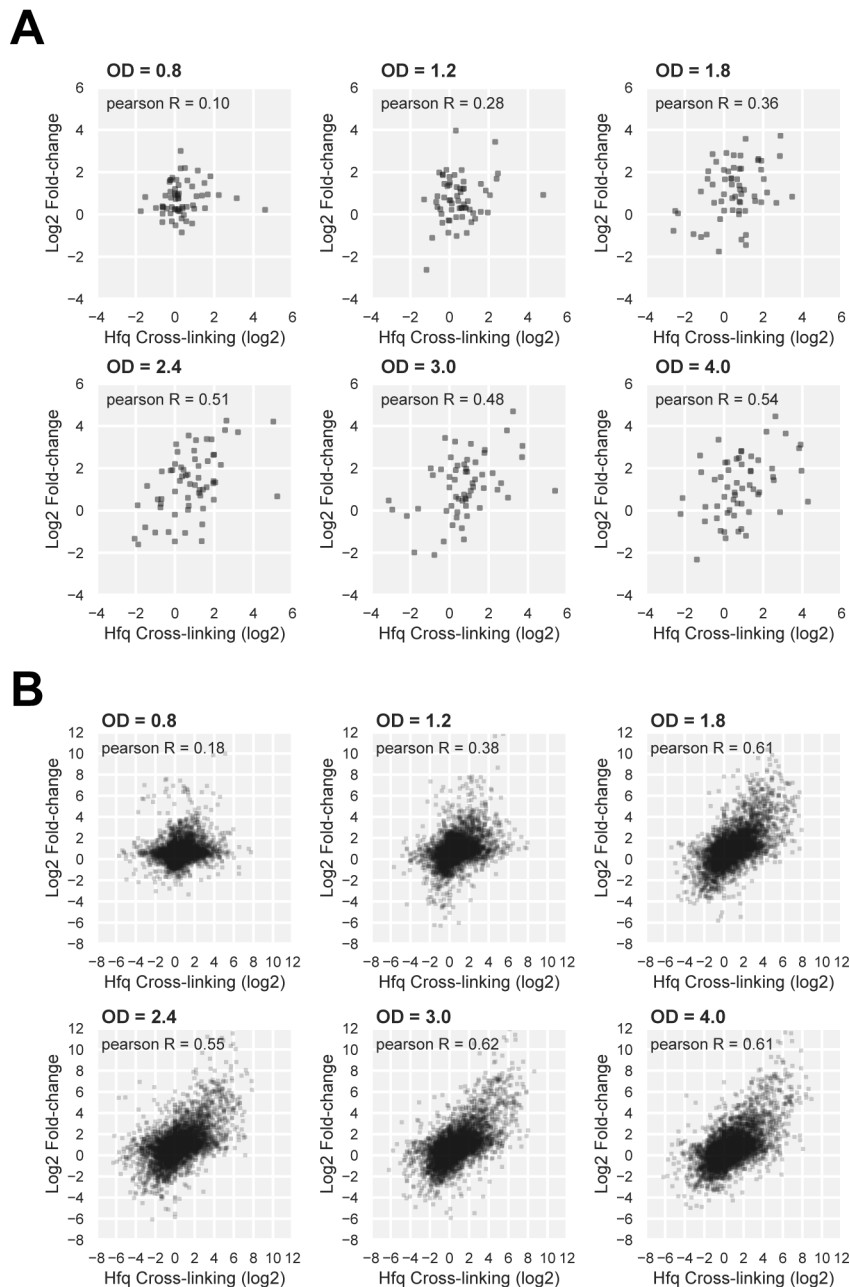

**Figure 2–figure supplement 1. The sRNA and mRNA levels are not always strongly correlated with Hfq binding during the various stages of growth.**

Scatter plots comparing changes in Hfq binding (x-axis) to RNA levels (y-axis) for the indicated OD<sub>600</sub> for sRNAs (A) and all transcript classes (B) show that the correlation improves at higher OD<sub>600</sub>. For each OD<sub>600</sub>, the Transcripts Per Million (TPM) normalised read counts at each

density-point were divided by the OD<sub>600</sub> 0.4 data, and the resulting ratios were log<sub>2</sub>-normalized. Pearson R coefficients describing the correlation between the two independent experiments at each OD<sub>600</sub> is also included for each plot.

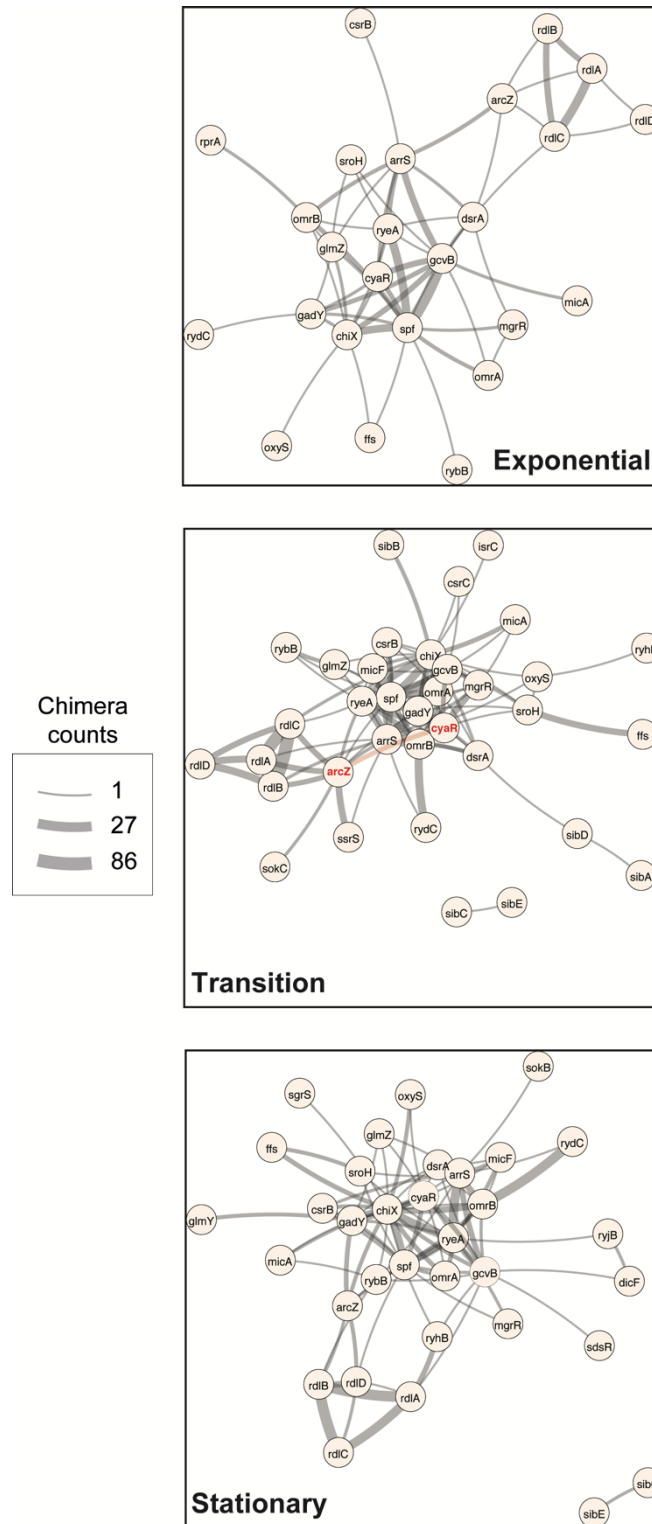

**Figure 4–figure supplement 1. sRNA-RNA interactions identified by CLASH are growth-stage specific.** sRNA-sRNA network generated from the statistically significant CLASH

interactions from two biological replicates, recovered at three main growth stages: exponential (OD<sub>600</sub> 0.4 and 0.8), transition (OD<sub>600</sub> 1.2, 1.8, 2.4) and early stationary (OD<sub>600</sub> 3.0 and 4.0). The thickness of the edges is proportional to the log<sub>2</sub>(unique chimera count for each interaction). Only sRNAs transcribed from independent promoters were included in the analysis.

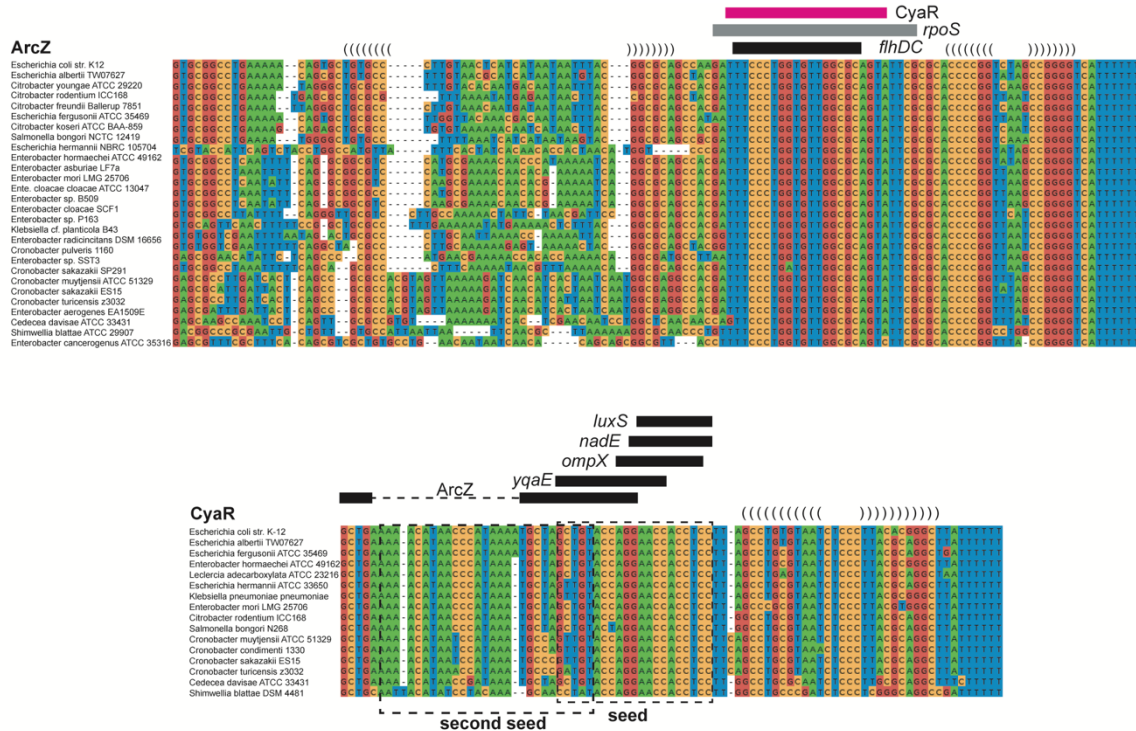

**Figure 4-figure supplement 2. Interactions between ArcZ, CyaR and GcvB are conserved.** Alignments of ArcZ, CyaR and GcvB were compiled as previously described (van Nues et al., 2016). Names of the enteric bacteria from which the sequence was retrieved are given on the left. Indicated are possible stem-loops (brackets), seed regions (boxed in dashed lines) and their interactions with various sections of ArcZ, CyaR or GcvB (blue and purple bars) or with other sRNAs and mRNAs (black bars). The CyaR sequence indicated with a blue bar is predicted to interact with two regions in GcvB (see blue bars in GcvB alignment), including the second seed sequence. A second interaction (pink bars) involves the seed sequence regions of CyaR and GcvB.

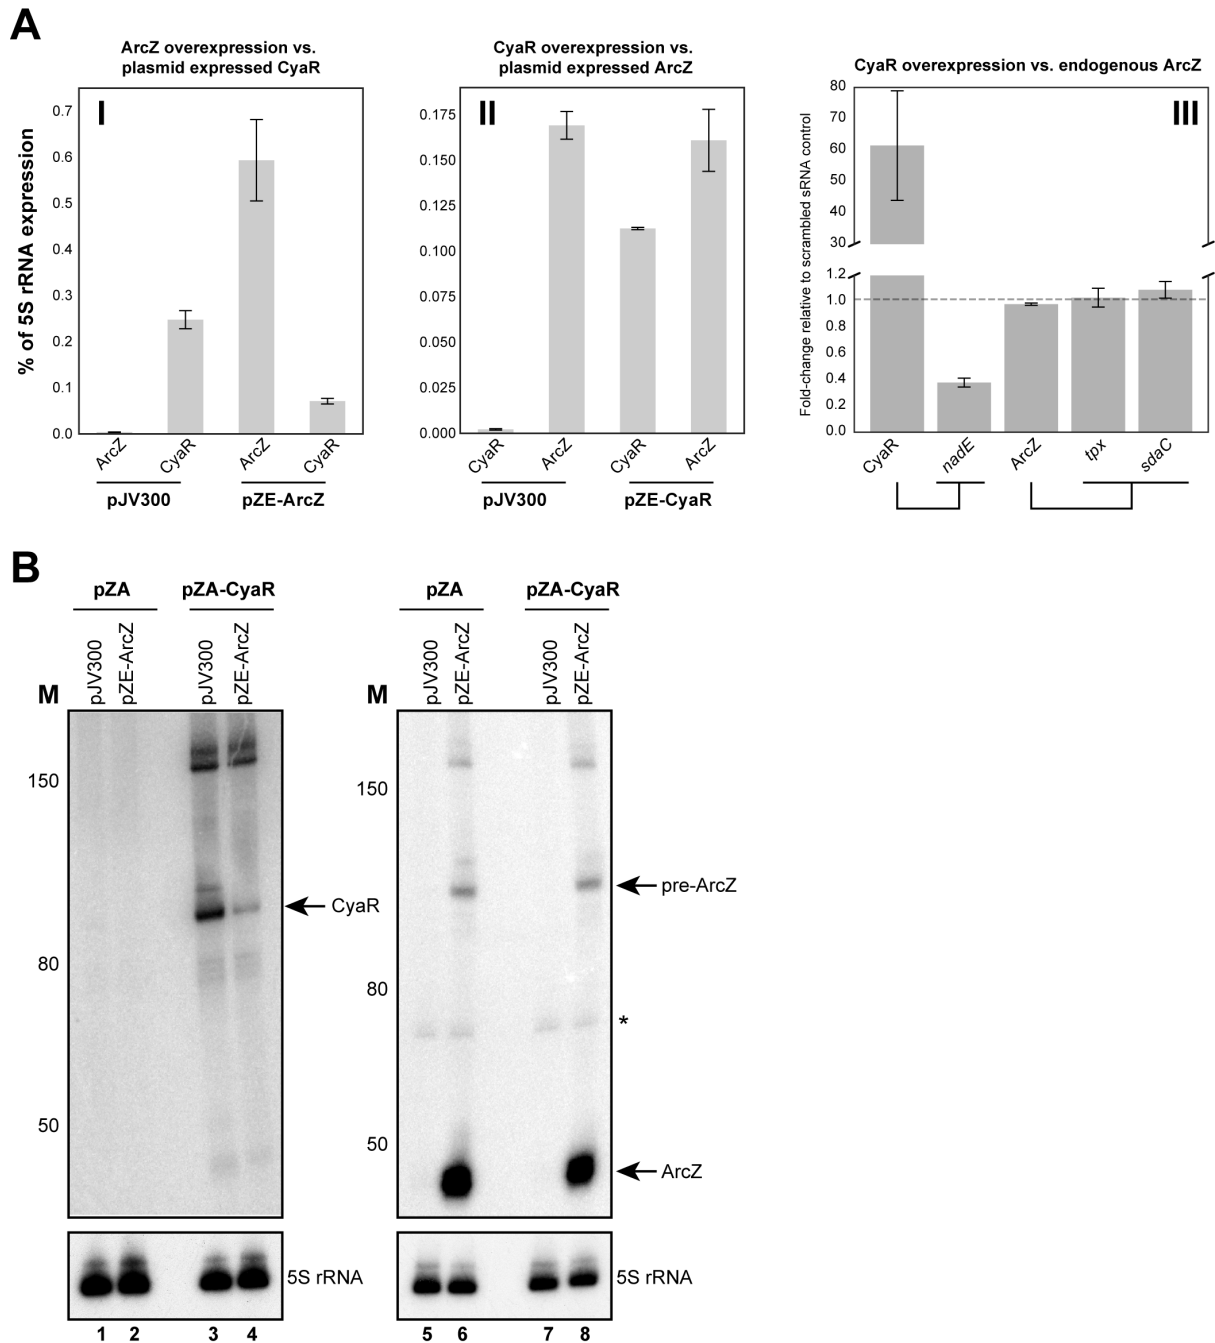

**Figure 4–figure supplement 3. ArcZ downregulates CyaR expression.**

(A) ArcZ and CyaR were overexpressed from a plasmid-borne IPTG inducible promoter (pZE-ArcZ and pZE-CyaR) and the data were compared to data from cells carrying a scrambled RNA plasmid (pJV300). The co-expressed candidate target sRNAs (expressed from pZA-derived backbone) were induced with anhydrotetracycline hydrochloride (panels I and II). The bars indicate the mean fold-change in expression relative to the level of 5S rRNA (*rrfD*) in cells with the indicated vector. In panel III endogenous ArcZ levels were measured upon overexpression of CyaR. Error bars indicate the standard error of the mean from three biological replicates and three technical replicates per experiment.

(B) Northern blot analysis of ArcZ and CyaR. The cells containing both the empty pZA and pJV300 plasmids (lanes 1, 5, 9) do not express ArcZ and CyaR at detectable levels.



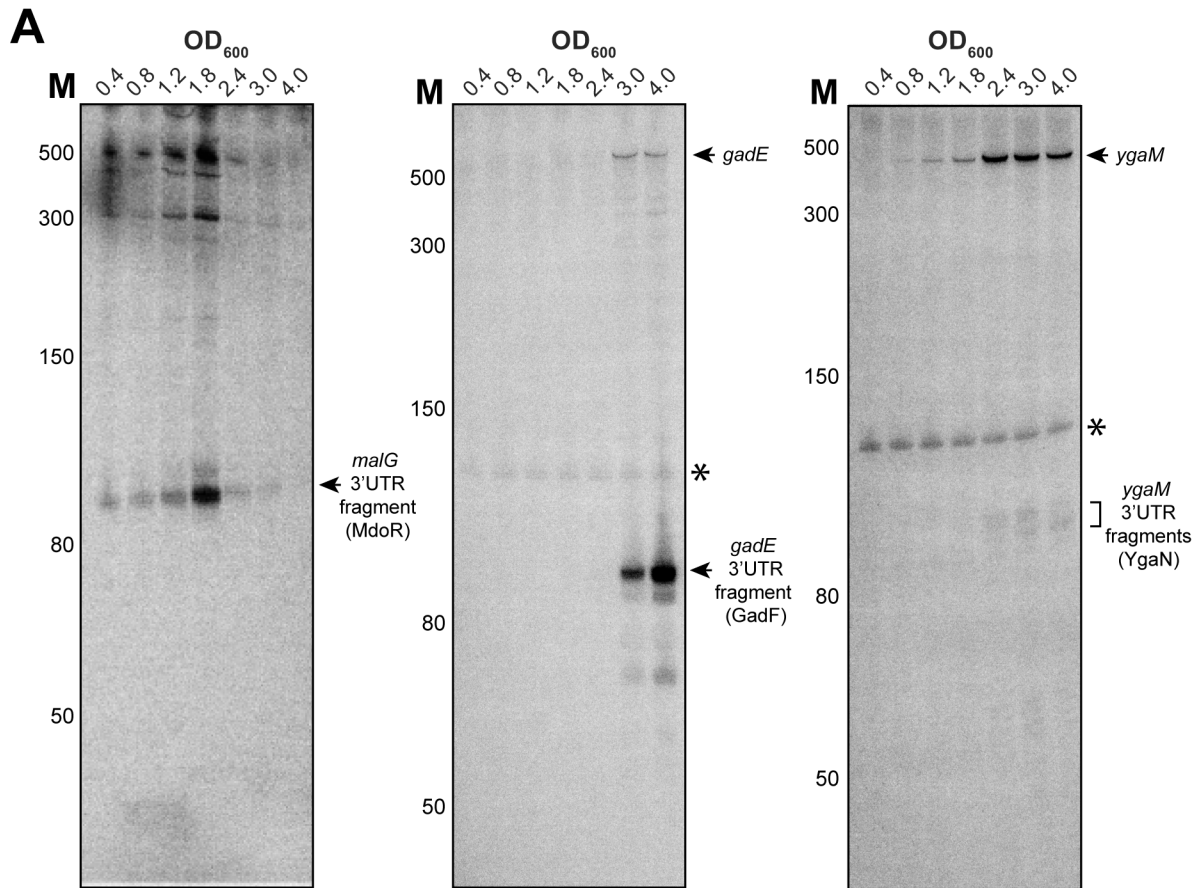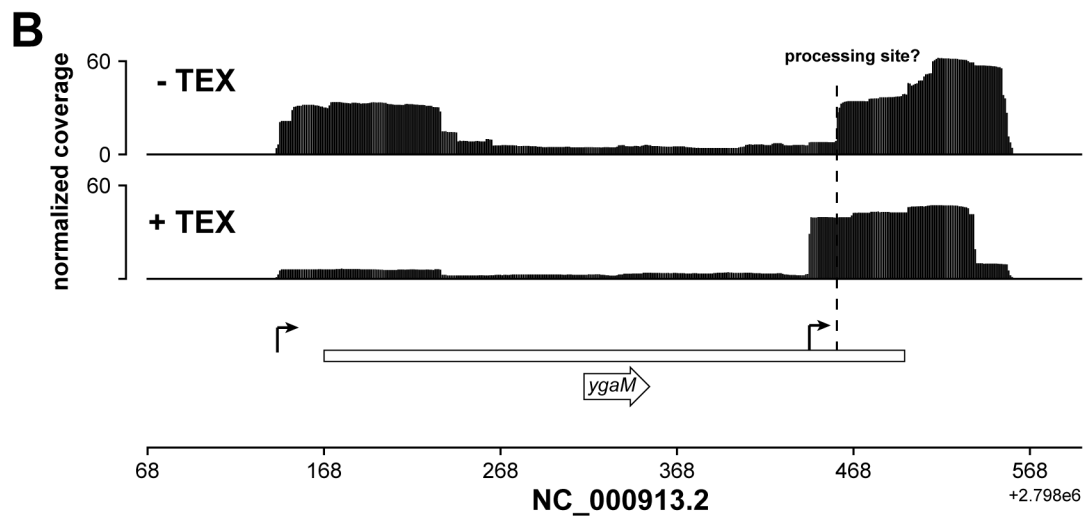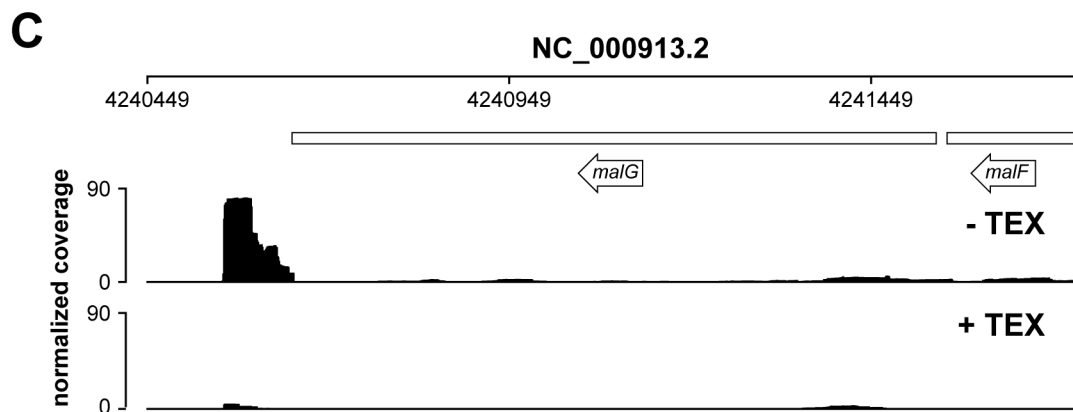

**Figure 5–figure supplement 1. *YgaM*, *gadE* and *malG* contain sRNAs in their 3'UTRs.**

**(A)** Validation of *malG* 3'UTR (MdoR), *ygaM* 3'UTR (YgaN) and *gadE* 3'UTR (GadF) sRNAs by Northern blot. Total RNA extracted from cells at the indicated optical densities (OD<sub>600</sub>) was resolved on 8% PAA-UREA gels and subjected to Northern blotting using oligos that hybridize with the 3'UTR of the respective transcripts. The asterisk indicates cross-reactivity of the probe with the 5S rRNA. The locations of the 3'UTR-derived fragments are indicated. MdoR and YgaN are ~110nt, whereas GadF fragment is ~90nt.

**(B, C)** Analysis of (Terminator 5'-Phosphate Dependent Exonuclease (TEX) RNA-seq datasets (Thomason et al., 2015) indicates that YgaN has an independent promoter, while MdoR is a degradation product of the *malEFG* operon. Genome browser tracks showing the location and normalised reads of *ygaM* and *malG* fragments in the absence of TEX (-TEX) and in the presence of TEX (+TEX). The *ygaM* and putative YgaN promoters are indicated. Independently transcribed YgaN could be further processed by RNases, at the site marked with a dashed vertical line.

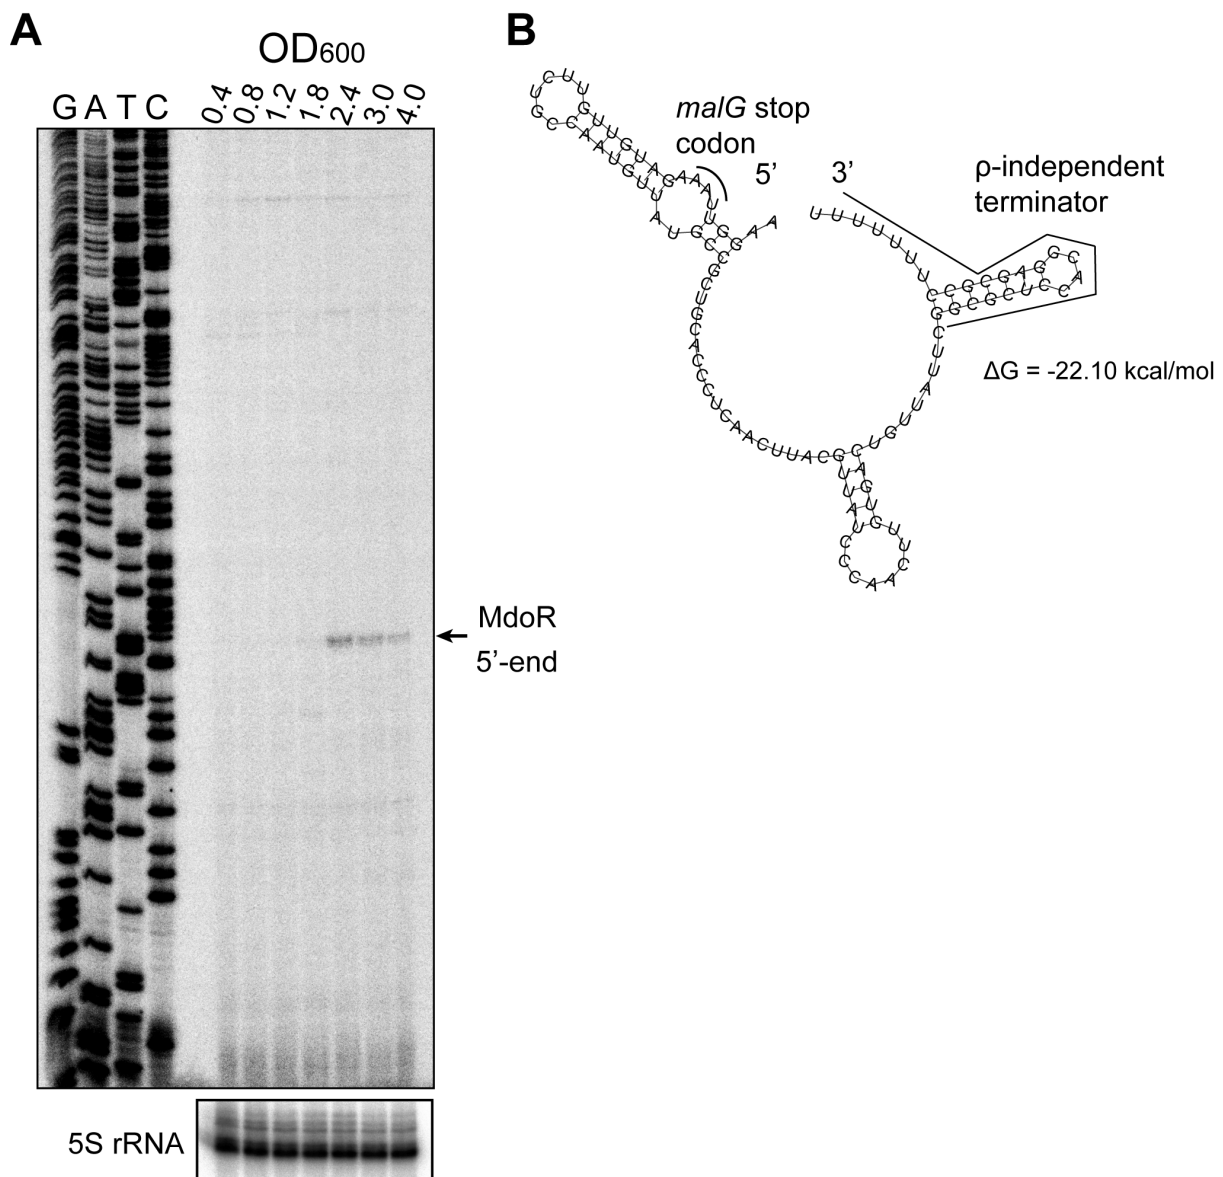

**Figure 6—figure supplement 1. Conservation and target prediction analyses of MdoR.**

(A) MdoR contains conserved and variable regions. Sequence conservation analysis of MdoR in several Gram-negative bacteria species (Mafft algorithm with defaults); the arrow indicates the 5'-end of MdoR; the *malG* stop codon and Rho-independent terminator sites are highlighted; the horizontal black lines indicate the base-pairing regions of MdoR with *ptsH* (top), OhsC, *ompA* and *ompC* (bottom) in *E. coli* as predicted by CLASH combined with *in silico* folding (RNACofold).

(B) MdoR is predicted to interact with its targets using two seed regions. Interaction regions within MdoR and top target mRNAs predicted by CopraRNA(Wright et al., 2014, 2013). Density plots showing the relative frequency of a specific MdoR (Left) or mRNA (Right) nucleotide position in all predicted sRNA-mRNA interactions with a p-value < 0.01 in all considered homologs. The vertical lines indicate local maxima; the aligned regions of the homologs are shown in grey, whereas the interacting regions are shown in arbitrary colors; only the top 20 representative clusters members are shown in the aligned regions, with the gene names indicated on the right.

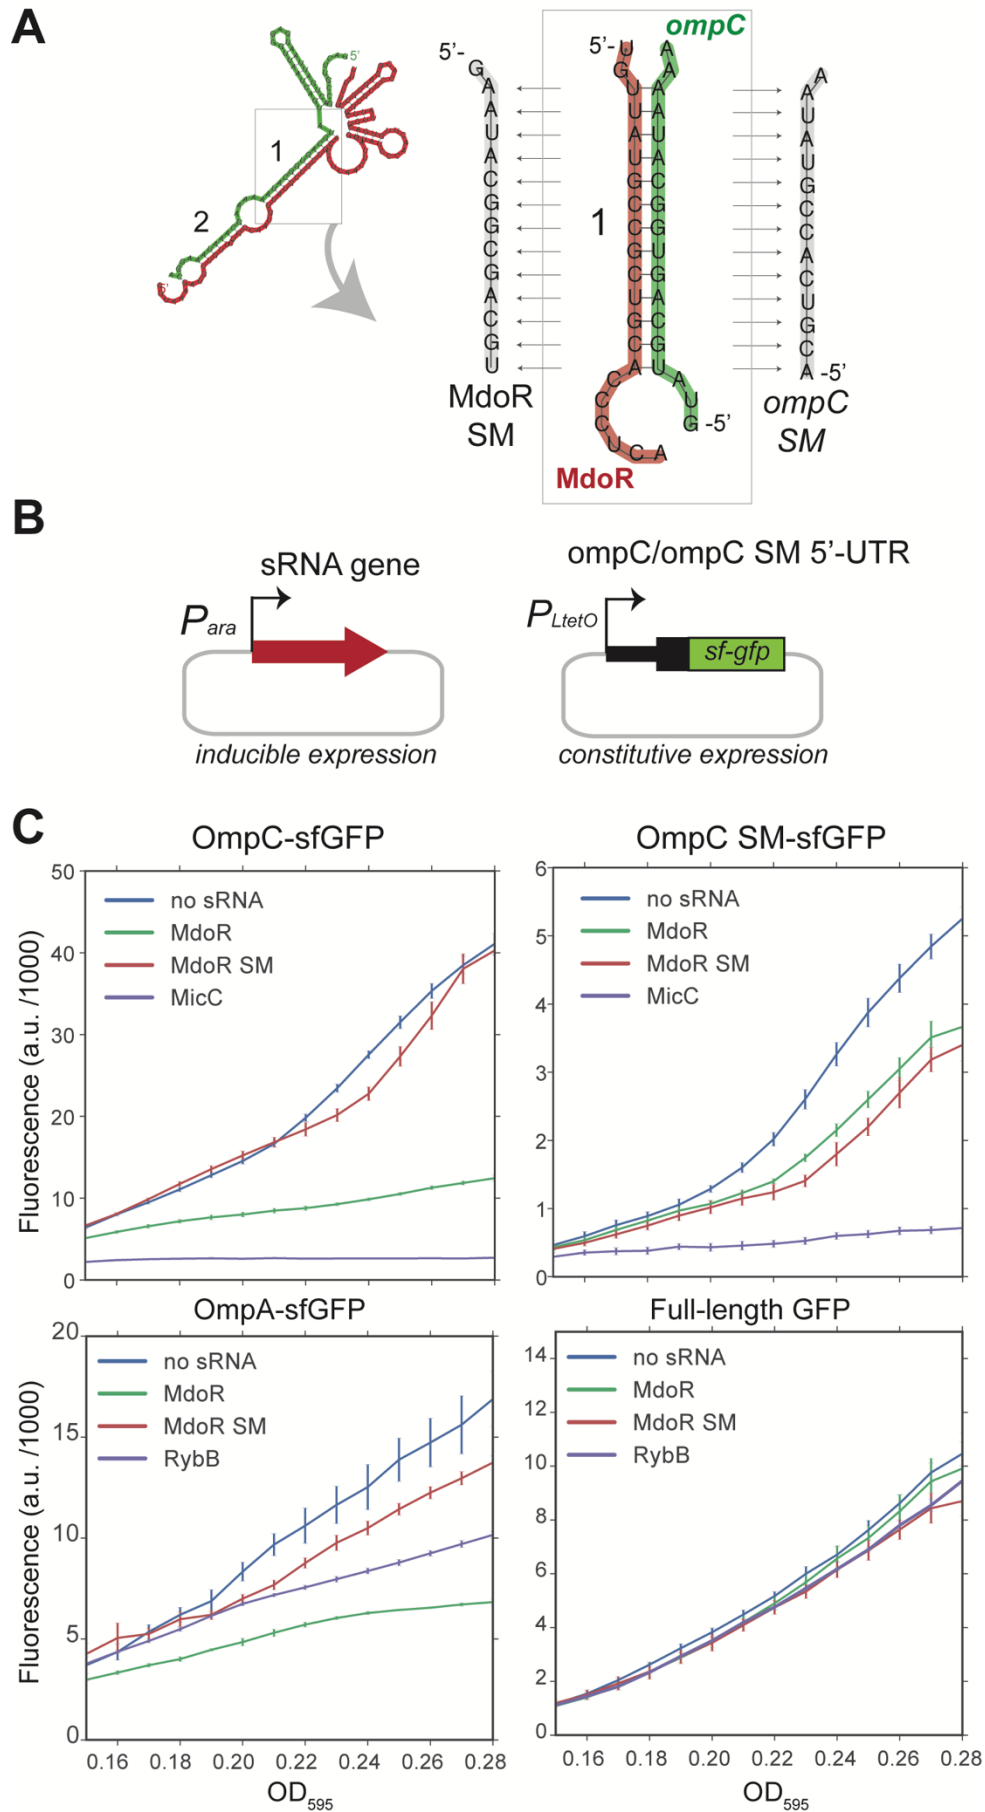

### Figure 8–figure supplement 1. Validation of MdoR-ompC interaction using GFP reporters.

(A) Design of the wild-type and mutant *ompC* constructs. The panel indicates the base-pairing region within the MdoR-*ompC* duplex that was mutated. We created an MdoR seed mutant (SM) and an *ompC* mutant in which base pairing with MdoR SM was restored.

(B) Plasmid system used for the reporter assay: in *E. coli* TOP10 cells, low-copy plasmids constitutively overexpress target 5'UTRs fused to sfGFP and medium-copy plasmids overexpress the full-length sRNAs upon induction with L-arabinose.

(C) MdoR downregulates expression of OmpC and OmpA sfGFP fusions. *In vivo* fluorescence measurements of OmpC, OmpC SM and OmpA sfGFP fusion proteins was measured using a Tecan plate reader system. As a negative control we included sfGFP alone in the presence or absence of sRNAs. The 'no sRNA' expressing strains contain the empty pBAD plasmid. The y-axis indicates fluorescence units (F.U.) reported by the plate reader. Experiments were performed in technical and biological triplicates; the fluorescence means and SEM of three biological replicates are reported. Source data for are provided as a Source Data file.

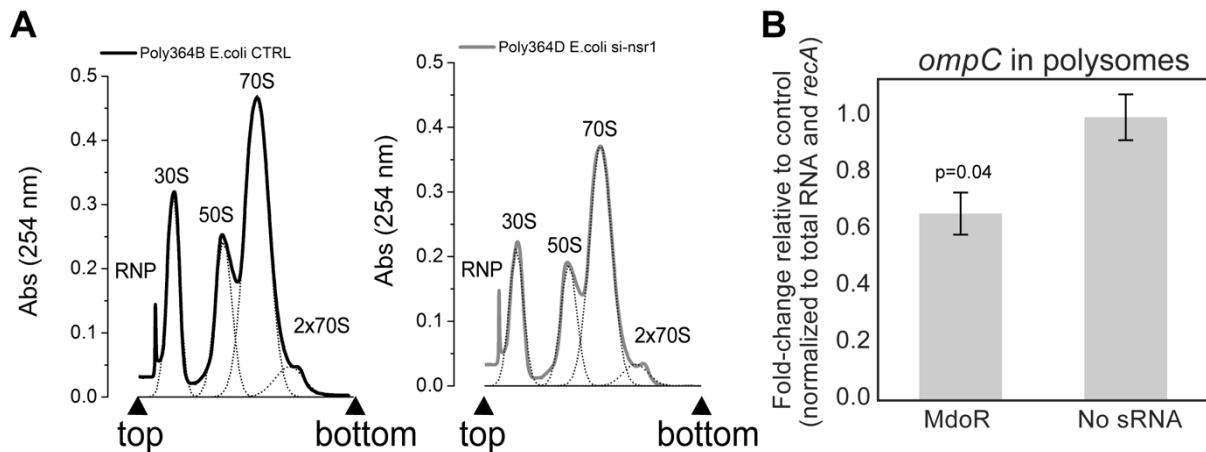

### Figure 8–figure supplement 2. MdoR regulates *ompC* mRNA translation in *E. coli*.

(A) Cultures at OD<sub>600</sub> 0.4 overexpressing MdoR or no sRNA for 15 minutes were subjected to polysome profiling. Profiles of the polysomal (2x70S) and subpolysomal fractions obtained for the empty plasmid control and MdoR overexpression samples.

(B) RT-qPCR analysis of the polysomal fractions: A 'total' fraction was obtained by mixing equal amounts/volumes of the polysomal and subpolysomal fractions and is representative of the cytosol/cell lysate content. Total RNA was extracted from all fractions (polysomal, subpolysomal and total). Expression of *ompC* in the polysomal fractions was quantified relative to the amount in 'total' fraction, normalized to *recA*, and calculated as fold-change relative to the control sample (y-axis). The experiments were performed in technical triplicates; the standard error of the mean (SEM) of three biological replicates fold changes are reported as error bars. Significance of the difference in *ompC* mRNA level in polysomes was assessed with a two-tailed Student's t-test. Source data for are provided as a Source Data file.



## Supplementary References

- Thomason MK, Bischler T, Eisenbart SK, Förstner KU, Zhang A, Herbig A, Nieselt K, Sharma CM, Storza G. 2015. Global transcriptional start site mapping using differential RNA sequencing reveals novel antisense RNAs in *Escherichia coli*. *J Bacteriol.* doi:10.1128/JB.02096-14
- van Nues RW, Castro-Roa D, Yuzenkova Y, Zenkin N. 2016. Ribonucleoprotein particles of bacterial small non-coding RNA *IsrA* (IS61 or *McaS*) and its interaction with RNA polymerase core may link transcription to mRNA fate. *Nucleic Acids Res* **44**:2577–2592.
- Webb S, Hector RD, Kudla G, Granneman S. 2014. PAR-CLIP data indicate that *Nrd1-Nab3*-dependent transcription termination regulates expression of hundreds of protein coding genes in yeast. *Genome Biol* **15**:R8. doi:10.1186/gb-2014-15-1-r8
- Wright PR, Georg J, Mann M, Sorescu DA, Richter AS, Lott S, Kleinkauf R, Hess WR, Backofen R. 2014. CopraRNA and IntaRNA: Predicting small RNA targets, networks and interaction domains. *Nucleic Acids Res* **42**:119–123. doi:10.1093/nar/gku359
- Wright PR, Richter AS, Papenfort K, Mann M, Vogel J, Hess WR, Backofen R, Georg J. 2013. Comparative genomics boosts target prediction for bacterial small RNAs. *Proc Natl Acad Sci* **110**:E3487–E3496. doi:10.1073/pnas.1303248110
- Wu X, Bartel DP. 2017. KpLogo: Positional k -mer analysis reveals hidden specificity in biological sequences. *Nucleic Acids Res.* doi:10.1093/nar/gkx323
